# Supplementary material
Source: publisher figshare collection journal article supplement (https://acs.figshare.com/ndownloader/files/5304655)
Supplement: Supplementary file 1 [file 5304655]

## Supporting Information

### Catalytic Ester Metathesis Reaction and its Application to Transfer Hydrogenation of Esters

*Abhishek Dubey and Eugene Khaskin\**

Okinawa Institute of Science and Technology Graduate University, 1919-1 Tancha, Onna-son, Kunigami-gun, Okinawa, Japan 904-0495;  
eugene.khaskin@oist.jp

### Index

#### S.N.

|   |                                                                                                                |         |
|---|----------------------------------------------------------------------------------------------------------------|---------|
| 1 | General Specifications                                                                                         | S4      |
| 2 | Experimental Procedures                                                                                        | S4      |
|   | General Procedure for ester metathesis                                                                         |         |
|   | General Procedure for ester transfer hydrogenation                                                             |         |
| 3 | Experimental                                                                                                   |         |
|   | J-Young tube ester metathesis experiment with ethyl hexanoate <b>10</b>                                        | S5-S6   |
|   | Synthesis of D <sub>2</sub> -benzylhexanoate <b>46</b> and benzylhexanoate <b>47</b>                           | S6-S7   |
|   | J-Young tube deuterium scrambling during metathesis with D <sub>2</sub> -benzyl hexanoate and benzyl hexanoate | S8-S9   |
|   | Kinetic NMR experiments with benzyl acetate <b>19</b>                                                          | S10-S12 |
|   | Kinetic NMR experiments with ethyl benzoate <b>20</b>                                                          | S13-S14 |
|   | Stoichiometric NMR experiments with benzyl acetate and benzyl alcohol                                          | S14-S19 |
|   | Discussion of mechanism                                                                                        | S20-S22 |
| 4 | DFT energies and optimized geometries                                                                          | S23-S25 |
| 5 | GC/FID spectra of metathesis and hydrogenation reactions                                                       | S26-S59 |
| 6 | References                                                                                                     | S60     |

#### Figure Index:

**Figure S1:** <sup>1</sup>H NMR of ethyl hexanoate **10** metathesis with catalyst **2**.

**Figure S2:** Expansion of <sup>1</sup>H NMR of ethyl hexanoate **10** reaction with **2**.

**Figure S3:** <sup>1</sup>H NMR of benzyl hexanoate **47**.

**Figure S4:** <sup>1</sup>H NMR of D<sub>2</sub>-benzyl hexanoate **46**.

**Figure S5:** <sup>1</sup>H NMR of benzyl hexanoate **47** after metathesis reaction

**Figure S6:** <sup>1</sup>H NMR of D<sub>2</sub>-benzyl hexanoate **46** after metathesis reaction. β CH<sub>2</sub> of hexanol at ~1.5ppm (minor overlap with catalyst peaks) and of hexanoate at ~2.2ppm. α CH<sub>2</sub> of hexanol at 4.0-4.3ppm. α CH<sub>2</sub> of benzyl alcohol at 5.0-5.2ppm.

**Figure S7.** Kinetics with 1.5 mg of **3**. <sup>1</sup>H NMR whole spectrum.

**Figure S8.** Kinetics with 1.5 mg of **3** and **19**. 3.85ppm ethyl acetate  $\alpha$  CH<sub>2</sub> of ethanol; 4.1ppm ethyl benzoate  $\alpha$  CH<sub>2</sub> of ethanol; 4.90ppm benzyl acetate  $\alpha$  CH<sub>2</sub> of benzyl alcohol; 5.13ppm benzyl benzoate  $\alpha$  CH<sub>2</sub> of benzyl alcohol.

**Figure S9.** Appearance of  $\alpha$  CH<sub>2</sub> of ethyl acetate with 1.5 mg of **3**. 50 °C; measurements every 5 minutes. Integration data (green) fitted to a first order integral  $kt=\ln(X_0/(X_0-X'))$ .  $k=5.66E-2$ . X-axis each point =5minutes

**Figure S10.** Appearance of  $\alpha$  CH<sub>2</sub> of ethyl acetate with 3.0 mg of **3**. 50 °C; measurements every 5 minutes. Integration data (green) fitted to a first order integral  $kt=\ln(X_0/(X_0-X'))$ .  $k=5.58E-2$ . X-axis each point =5minutes

**Figure S11.** Appearance of  $\alpha$  CH<sub>2</sub> of ethyl benzoate with 3.0 mg of **3**. 50 °C; measurements every 5 minutes. No reasonable fit found. Induction period for the first half hour. X-axis each point =5minutes

**Figure S12.** Appearance of  $\alpha$  CH<sub>2</sub> of benzyl benzoate and with 3.0 mg of **3**. 50 °C; measurements every 5 minutes. Integration data (green) fitted to a first order integral  $kt=\ln(X_0/(X_0-X'))$ .  $k=5.50E-2$ . X-axis each point =5minutes

**Figure S13.** Kinetics with 4.0 mg of **3** and **20**. 3.85ppm ethyl acetate  $\alpha$  CH<sub>2</sub> of ethanol; 4.1ppm ethyl benzoate  $\alpha$  CH<sub>2</sub> of ethanol; 4.90ppm benzyl acetate  $\alpha$  CH<sub>2</sub> of benzyl alcohol; 5.13ppm benzyl benzoate  $\alpha$  CH<sub>2</sub> of benzyl alcohol.

**Figure S14.** Appearance of  $\alpha$  CH<sub>2</sub> of ethyl acetate with 4.0 mg of **3**. 50 °C; measurements every 5 minutes.

**Figure S15.** Appearance of  $\alpha$  CH<sub>2</sub> of ethyl benzoate with 3.0 mg of **3**. 50 °C; measurements every 5 minutes.

**Figure S16.** Appearance of  $\alpha$  CH<sub>2</sub> of benzyl benzoate and with 3.0 mg of **3**. 50 °C; measurements every 5 minutes.

**Figure S17.** <sup>1</sup>H NMR of **3**, soon after mixing with KO<sup>t</sup>Bu in C<sub>6</sub>D<sub>6</sub>.

**Figure S18.** <sup>1</sup>H NMR of **3**, 3 h after mixing with KO<sup>t</sup>Bu in C<sub>6</sub>D<sub>6</sub> and heating at 50°C.

**Figure S19.** <sup>1</sup>H NMR of **3** with 0.5 equiv of benzyl acetate after 10 minutes of heating at 50 °C. 3.90ppm quartet ethyl acetate  $\alpha$  CH<sub>2</sub> of ethanol; 4.1ppm quartet of ethyl benzoate  $\alpha$  CH<sub>2</sub> of ethanol; 4.95ppm benzyl acetate  $\alpha$  CH<sub>2</sub> of benzyl alcohol; 5.17ppm benzyl benzoate  $\alpha$  CH<sub>2</sub> of benzyl alcohol.

**Figure S20.** <sup>1</sup>H NMR of **3** with 1 equiv of benzyl acetate after 10 minutes of heating at 50°C. 3.90ppm quartet ethyl acetate  $\alpha$  CH<sub>2</sub> of ethanol; 4.1ppm quartet of ethyl benzoate  $\alpha$  CH<sub>2</sub> of ethanol; 4.95ppm benzyl acetate  $\alpha$  CH<sub>2</sub> of benzyl alcohol; 5.17ppm benzyl benzoate  $\alpha$  CH<sub>2</sub> of benzyl alcohol.

**Figure S21.** <sup>1</sup>H NMR of **3** with 1 equiv. of benzyl acetate after overnight at r.t. 3.90ppm quartet ethyl acetate  $\alpha$  CH<sub>2</sub> of ethanol; 4.1ppm quartet of ethyl benzoate  $\alpha$  CH<sub>2</sub> of ethanol; 4.95ppm benzyl acetate  $\alpha$  CH<sub>2</sub> of benzyl alcohol; 5.17ppm benzyl benzoate  $\alpha$  CH<sub>2</sub> of benzyl alcohol.

**Figure S22.** <sup>1</sup>H NMR solution from Figure S17 after adding 5 more equiv of benzyl acetate and leaving at r.t. for 3 hours. 3.90ppm quartet ethyl acetate  $\alpha$  CH<sub>2</sub> of ethanol; 4.1ppm quartet of ethyl benzoate  $\alpha$  CH<sub>2</sub> of ethanol; 4.95ppm benzyl acetate  $\alpha$  CH<sub>2</sub> of benzyl alcohol; 5.17ppm benzyl benzoate  $\alpha$  CH<sub>2</sub> of benzyl alcohol.

**Figure S23.** <sup>1</sup>H NMR of **3** with 6 equiv of **20**, 15 minutes after mixing at r.t. 3.90ppm quartet ethyl acetate  $\alpha$  CH<sub>2</sub> of ethanol obscured by carbon satellite of **20**; 4.1ppm quartet of ethyl benzoate  $\alpha$  CH<sub>2</sub> of ethanol

**Figure S24.** <sup>1</sup>H NMR of **3** with 6eq. of **20**, 4.5 hours after heating. 3.90ppm quartet ethyl acetate  $\alpha$  CH<sub>2</sub> of ethanol; 4.1ppm quartet of ethyl benzoate  $\alpha$  CH<sub>2</sub> of ethanol; 4.95ppm benzyl acetate  $\alpha$  CH<sub>2</sub> of benzyl alcohol; 5.17ppm benzyl benzoate  $\alpha$  CH<sub>2</sub> of benzyl alcohol.

**Figure S25.** Mechanistic Figure from the main text with deuteration experiment included

**Figure S26.** GC chromatograph (Table-1, entry-1)

**Figure S27.** GC chromatograph (Table-1, entry-2)

**Figure S28.** GC chromatograph (Table-1, entry-3)

**Figure S29.** GC chromatograph (Table-1, entry-4)

**Figure S30.** GC chromatograph (Table-1, entry-5)

**Figure S31.** GC chromatograph (Table-1, entry-6)

**Figure S32.** GC chromatograph (Table-1, entry-7)

**Figure S33.** GC chromatograph (Table-2, Entry-1)

**Figure S34.** GC chromatograph (Table-2, Entry-3)

**Figure S35.** GC chromatograph (Table-2, Entry-4)

**Figure S36.** GC chromatograph (Table-2, Entry-5)

**Figure S37.** GC chromatograph (Table-3, Entry-1)

**Figure S38.** GC chromatograph (Table-3, Entry-2)

**Figure S39.** GC chromatograph (Table-3, Entry-3)

**Figure S40.** GC chromatograph (Table-3, Entry-4)

**Figure S41.** GC chromatograph (Table-3, Entry-5)

**Figure S42.** GC chromatograph (Table-3, Entry-6)

**Figure S43.** GC chromatograph (Table-3, Entry-7)

**Figure S44.** GC chromatograph (Table-3, Entry-8)

**Figure S45.** GC chromatograph (Table-3, Entry-9)

**Figure S46.** GC chromatograph (Table-4, Entry-1)

**Figure S47.** GC chromatograph (Table-4, Entry-2)

**Figure S48.** GC chromatograph (Table-4, Entry-3)

**Figure S49.** GC chromatograph (Table-4, Entry-4)

**Figure S50.** GC chromatograph (Table-4, Entry-5)

**Figure S51.** GC chromatograph (Table-4, Entry-6)

**Figure S52.** GC chromatograph (Table-4, Entry-7)

**Figure S53.** GC chromatograph (Table-4, Entry-8)

**Figure S54.** GC chromatograph (Table-4, Entry-9)

**Figure S55.** GC chromatograph (Table-4, Entry-10)

**Figure S56.** GC chromatograph (Table-4, Entry-11)

**Figure S57.** GC chromatograph (Table-4, Entry-14)

**Figure S58.** GC chromatograph (Table-4, Entry-15)

**Figure S59.** GC chromatograph (Table-4, Entry-16)

## General Specifications

All catalytic experiments with metal complexes were carried out via a general procedure specified in the main manuscript. Identity and distribution of the products were established on a QP2010 Ultra Shimadzu GC/MS system equipped with a SH-Rxi-1ms 30meter column. Yields were determined by NMR for stoichiometric/low substrate J-Young tube experiments. In most cases, yields were calculated from GC/FID results using a GC2014 Shimadzu system equipped with a SH-Rxi-1ms 60meter column, with mesitylene internal standard added after reaction completion. Standards of alcohol and ester products were run against the internal standard to determine conversion ratios and an average value for the conversion factor was obtained after several runs. Inert atmosphere experiments were carried out under an atmosphere of purified nitrogen in an MBraun Unilab pro glovebox. Ester substrates were purchased from Aldrich, Alfa Aesar, TCI and Ark-pharma and were used as is without purification. Deuterated solvents used in the study: C<sub>6</sub>D<sub>6</sub> from Euroiso-top was transferred to the glove box, dried overnight over CaH<sub>2</sub> and filtered through celite. Complexes **2**, **3**, and **4** were purchased from TCI (**2**) and Aldrich (**3,4**). Complex **3** was also synthesized according to published procedure.<sup>1</sup>

<sup>1</sup>H, <sup>31</sup>P NMR spectra were recorded at 400, and 161 MHz respectively, using a Bruker Ascend(AvanceIII) 400MHz and JEOL ECZ series 400MHz spectrometers. <sup>1</sup>H and <sup>31</sup>P NMR chemical shifts are reported in ppm downfield from tetramethylsilane and corrected against PPh<sub>3</sub> (-6ppm) external standard respectively.

## Experimental Procedures

### General Procedure for ester metathesis

The catalyst (1 mg, 0.0016 mmol) and KO<sup>t</sup>Bu (0.9 mg, 0.008 mmol) were mixed together in a 11 mL screwcap vial in the glove box. 3 mL of toluene solvent was added and stirred for 5 min, after which the ester (equivalents given in Tables 1 and 2, but typically 500 equiv or 0.8 mmol) was added. The screw top vial was closed and the cap was wrapped with electric tape to prevent atmosphere exchange. The vial was taken out of the glove box and heated in an oil bath for 16 hours at 80 °C while the contents were being stirred. At the end of the reaction, 100 equiv of mesitylene internal standard were added based on the catalyst and the mixture was analyzed by GC/FID. Standards of pure symmetrical products were available in most cases and were earlier calibrated against the internal standard on the same GC/FID system and under the same run conditions/column. The symmetrical metathesis product had the same conversion factor as its starting material isomer. Information for standard conversion factors is given under each relevant GC trace (Figures S26-S59).

### General Procedure for ester hydrogenation

The catalyst (1 mg, 0.0016 mmol) and KO<sup>t</sup>Bu (0.9 mg, 0.008 mmol) were mixed together in a 11 mL screwcap vial in the glove box. 2 mL of toluene solvent was added and stirred for 5 min, after which the ester (amounts vary in Table 3 from 100 to 500 equiv, but typically 500 equiv or 0.16 mmol; 0.16 mmol for Table 4) and ethanol (20 equiv) was added before the vial was sealed. The screw top vial was closed and the cap was wrapped with electric tape to prevent atmosphere exchange. The vial was taken out of the glove box and heated in an oil bath for 16 hours at 80 °C while the contents were being stirred. At the end of the reaction, 100 equiv of mesitylene internal standard were added based on the catalyst and the mixture was analyzed by GC/FID. Standards of pure alcohol products were available and were earlier



calibrated against mesitylene on the same GC/FID system under the same run conditions/column.

## Experimental

### NMR experiment with ethyl hexanoate **10** and complex **2**.

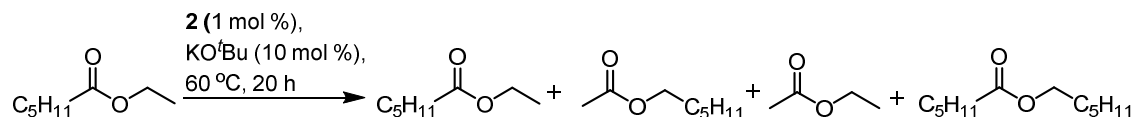

Base, catalyst and ester were mixed together in a J-Young NMR tube in  $\text{C}_6\text{D}_6$ , heated at  $60\text{ }^\circ\text{C}$ , and the reaction was checked the next day. Although lower catalyst loadings than (0.5 mol %) were viable for the reaction in the case of **2**, the reaction was only consistently reproducible when a 1 mol % loading was used. Based on the integration of the  $\alpha\text{ CH}_2$  in hexanol moieties and  $\beta\text{ CH}_2$  in hexanoate moieties, the metathesis proceeded to at least 98% completion. Ethyl ethanoate, which is not observed by GC/FID or GC/MS, is easily detected here and in all subsequent NMR experiments.

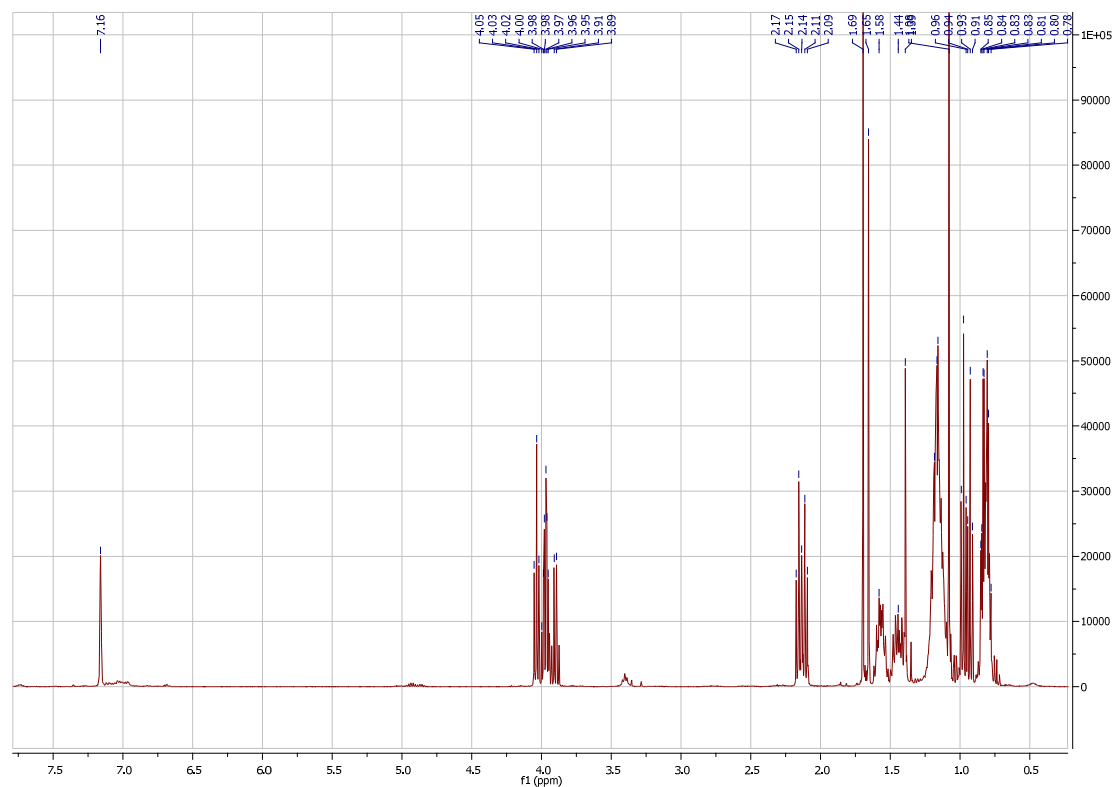

**Figure S1.**  $^1\text{H}$ NMR of ethyl hexanoate **10** metathesis with catalyst **2**.

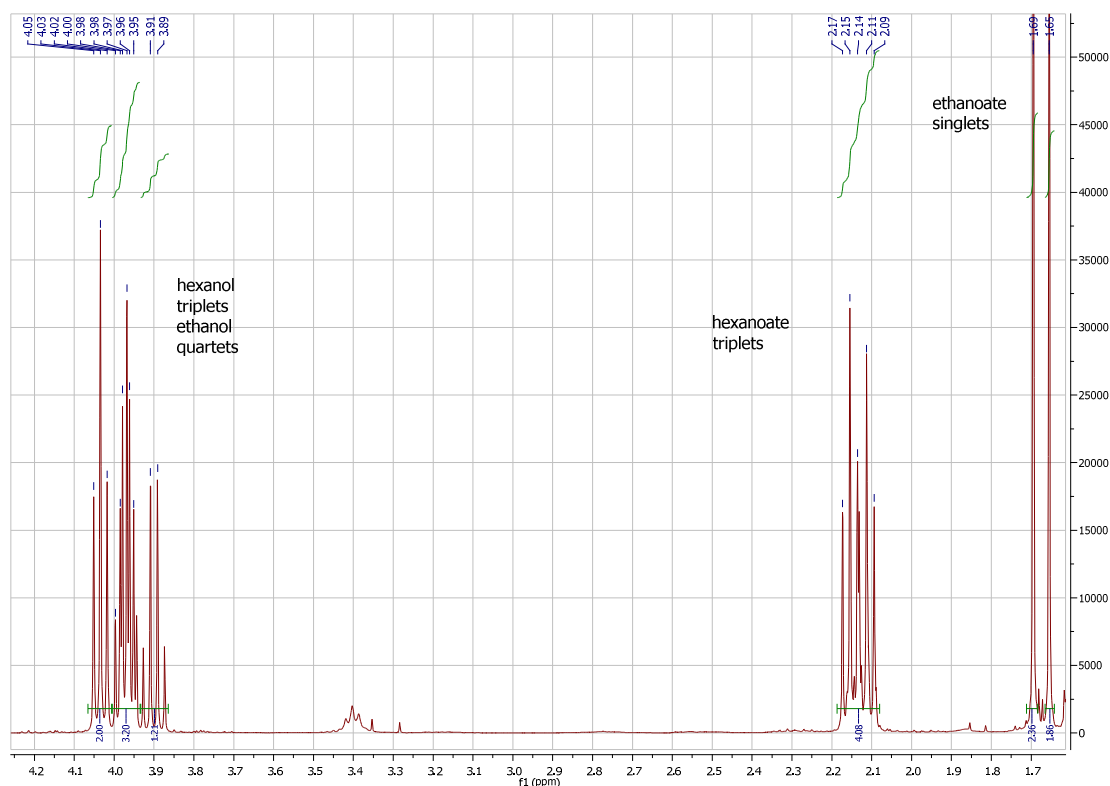

**Figure S2.** Expansion of  $^1\text{H}$ NMR of ethyl hexanoate **10** reaction with **2**.

### Synthesis of $\text{D}_2$ benzylhexanoate **46** and subsequent scrambling experiment.

#### Synthesis of $\text{D}_2$ benzylic alcohol (Procedure adapted from earlier work)<sup>2</sup>

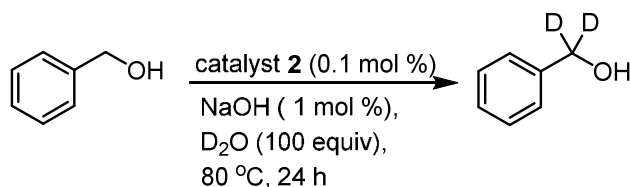

Under an argon atmosphere, 1 mL of benzyl alcohol was mixed with 100 equiv of deuterated water (18.5 mL) in a Schlenk tube, and 1 mol % of NaOH (~4 mg) and 0.1 mol % of RuMACHO catalyst (5.4 mg) were added. The tube was closed and heated at 80  $^\circ\text{C}$  for 24 h, with periodic shaking in order to remove condensation from walls. After one day, the product was extracted with ether (2 x 20 mL), washed with water, concentrated  $\text{NaHCO}_3$ , and concentrated NaCl solution, dried over anhydrous  $\text{MgSO}_4$ , filtered and concentrated to obtain pure  $\text{D}_2$ -benzylalcohol which was used in the next step after NMR confirmation.

#### Synthesis of $\text{D}_2$ benzylic hexanoate **46**:

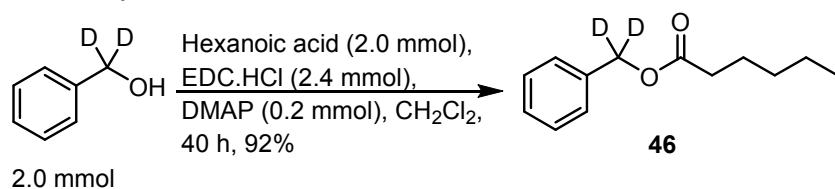

To a solution of hexanoic acid (232.3 mg, 2.0 mmol), EDC.HCl (460 mg, 2.4 mmol), and DMAP (24.4 mg, 0.2 mmol) in CH<sub>2</sub>Cl<sub>2</sub> (6 mL) was added benzyl alcohol (220 mg, 2.0 mmol). After 40 h, chloroform (20 mL) and water (20 mL) were added and the layers were separated. The aqueous layer was extracted with chloroform (20 mL) and the combined organic layers were washed with brine (50 mL), dried over MgSO<sub>4</sub>, and concentrated under reduced pressure. The crude product was purified by column chromatography (hexane : ethyl acetate = 98 : 2) to give the product as a colorless liquid (92% yield). <sup>1</sup>H NMR (400MHz, CDCl<sub>3</sub>)  $\delta$  0.87 (t, *J* = 6.8 Hz, 3H), 1.26-1.31 (m, 4H), 1.58-1.67 (m, 4H), 2.33 (t, *J* = 7.2 Hz, 2H), 7.32-7.35 (m, 5H) <sup>13</sup>CNMR (100 MHz, CDCl<sub>3</sub>)  $\delta$  13.9, 22.3, 24.6, 31.3, 34.3, 65.5, 128.1, 128.2, 128.5, 173.6.

### Synthesis of benzyl hexanoate **47**:<sup>3</sup>

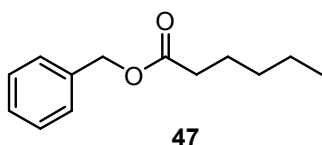

The title compound was prepared according to the procedure for the D<sub>2</sub>-benzyl hexanoate. The product was obtained as a colorless liquid (96% yield). <sup>1</sup>H NMR (400MHz, CDCl<sub>3</sub>)  $\delta$  0.87 (t, *J* = 6.8 Hz, 3H), 1.37-1.25 (m, 4H), 1.63 (quint, *J* = 7.6 Hz, 2H), 2.33 (t, *J* = 7.6 Hz, 2H), 5.10 (s, 2H), 7.28-7.37 (m, 5H).

### Deuterium scrambling experiment.

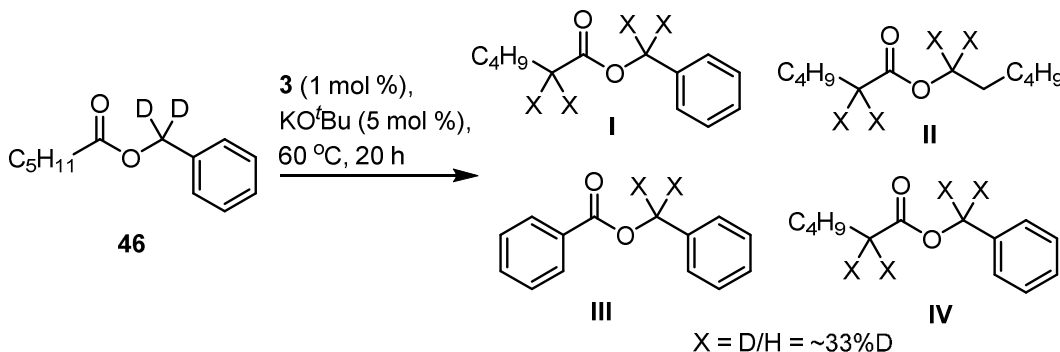

The experiment was done as described above for a catalytic ester metathesis except with D<sub>2</sub>-benzyl acetate **46** and normal benzyl acetate **47** as substrates in J-Young NMR tubes. 1 mol % of catalyst **3** was used and heating was stopped after 16 hours. With the para-H peaks of benzoate products used as the standard and comparing the two reactions, the deuterated substrate showed that scrambling occurred into the  $\beta$  CH<sub>2</sub> to the same extent as onto the  $\alpha$  CH<sub>2</sub> of the hexyl moieties. Although careful integration of the NMR makes it difficult to say that the scrambling is statistical, it is unambiguously present to a large extent. We argue that this is due to the presence of hexyl aldehyde, which is capable of undergoing keto-enol tautomerism and subsequent H/D scrambling through activation of the OH bond by a metal intermediate. Other hydrogen bonds, including those on the phenyl ring of the benzyl moiety, are unaffected.

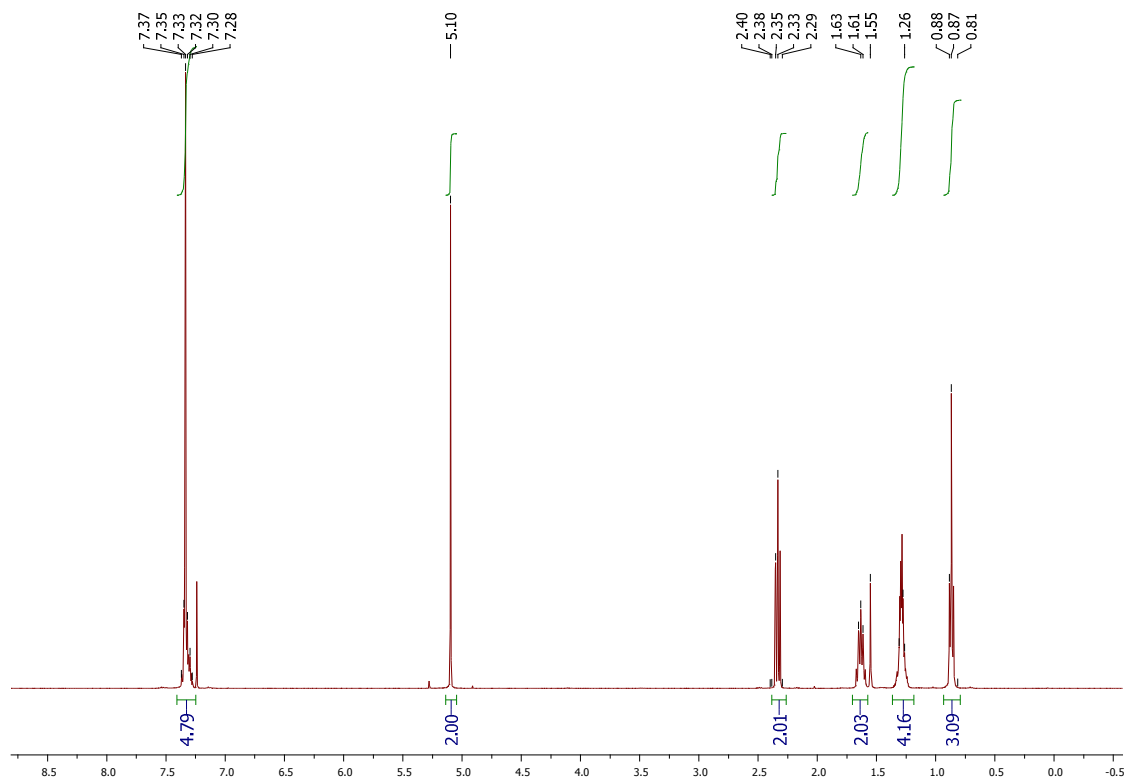

Figure S3. <sup>1</sup>H NMR of benzyl hexanoate 47.

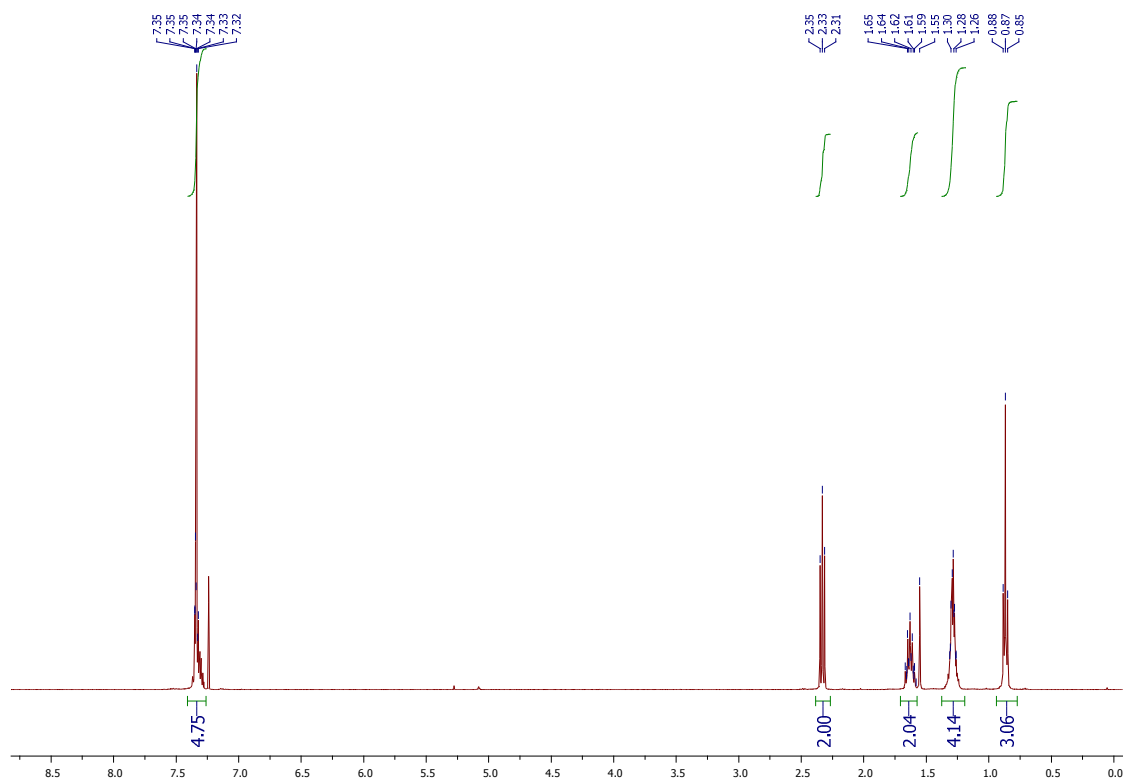

Figure S4. <sup>1</sup>H NMR of D<sub>2</sub>-benzyl hexanoate 46.

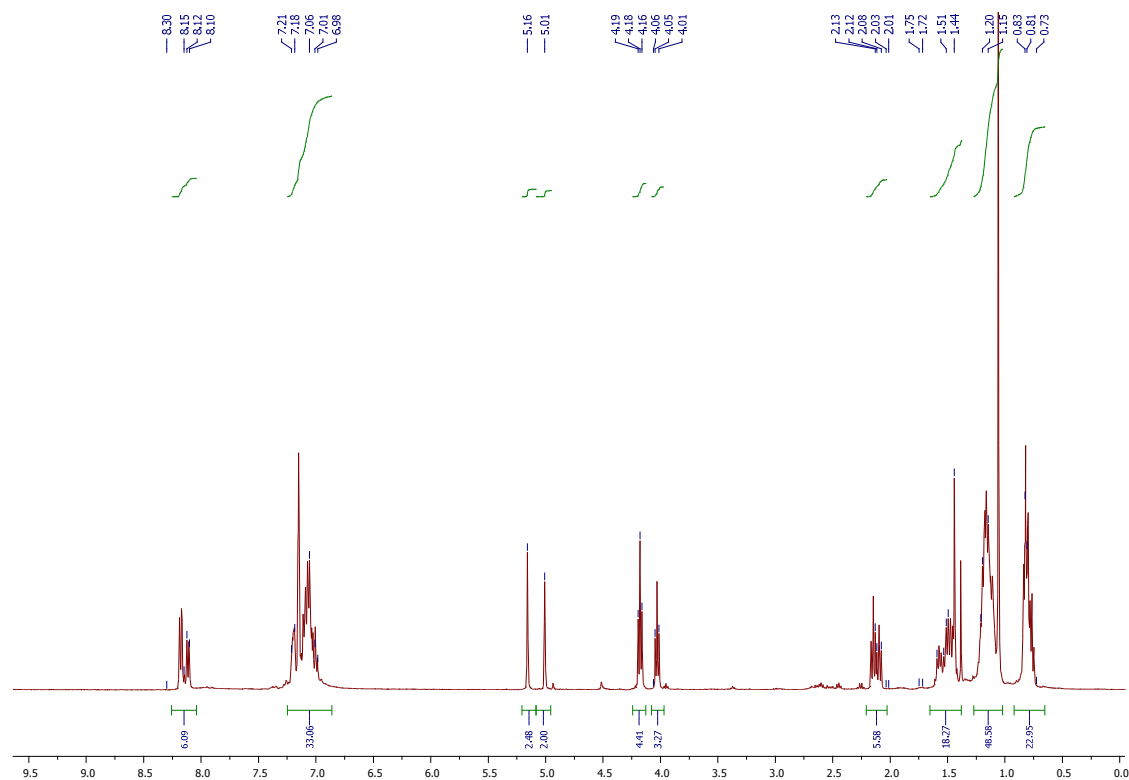

**Figure S5.**  $^1\text{H}$  NMR of benzyl hexanoate **47** after metathesis reaction

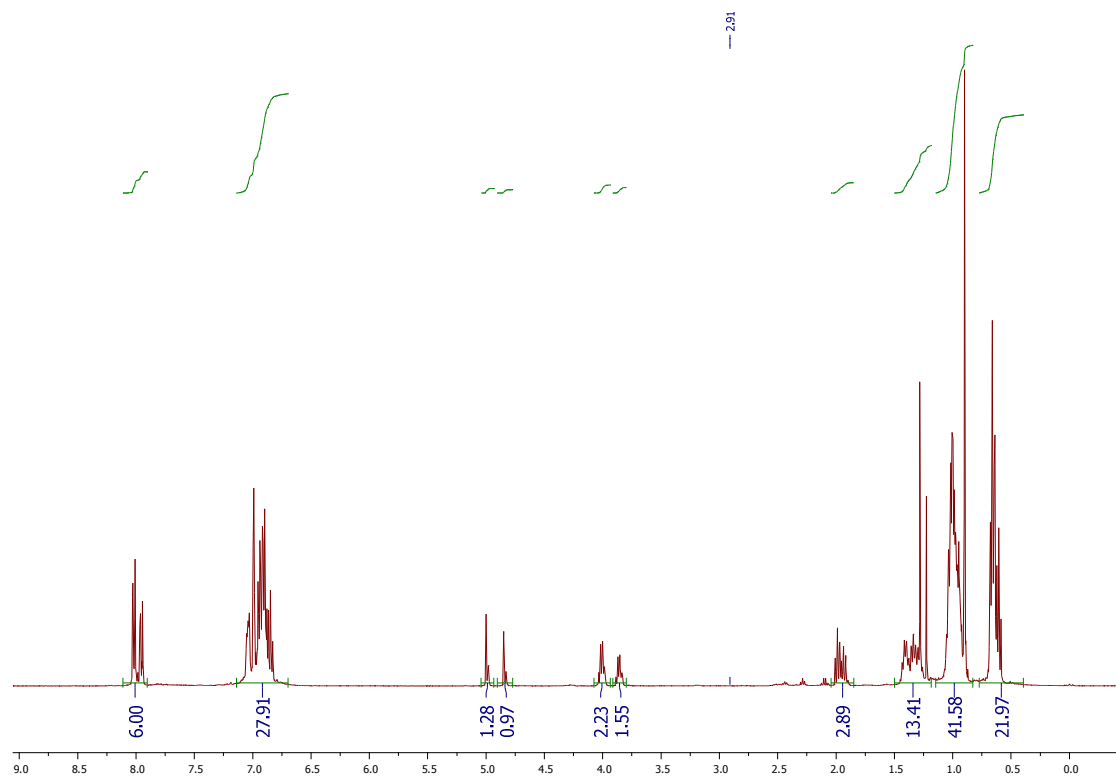

**Figure S6.**  $^1\text{H}$  NMR of  $\text{D}_2$ -benzyl hexanoate **46** after metathesis reaction.  $\beta$   $\text{CH}_2$  of hexanol at  $\sim 1.5\text{ppm}$  (minor overlap with catalyst peaks) and of hexanoate at  $\sim 2.2\text{ppm}$ .  $\alpha$   $\text{CH}_2$  of hexanol at  $4.0\text{-}4.3\text{ppm}$ .  $\alpha$   $\text{CH}_2$  of benzyl alcohol at  $5.0\text{-}5.2\text{ppm}$ .

### Kinetic NMR experiments with benzyl acetate 19

A series of reactions were set up that varied the concentration of the catalyst with a constant concentration of benzyl acetate substrate of 1.57mmol in 0.6 mL of C<sub>6</sub>D<sub>6</sub> (0.26M, 223μL.). The catalyst was mixed together with 1.2 equiv. of KO<sup>t</sup>Bu base in a J-Young NMR tube, solvent was added followed by the substrate. Afterwards, the kinetic experiment was started as soon as possible at 50 °C in the JEOL ECZS instrument, typically within half an hour after mixing. The reaction was followed for 4.5 hours.

The amounts of catalyst, as well as the initial reaction rate as calculated based on the appearance of ethyl acetate as the representative product, are given in the table below (Table S1). The first 50 minutes of heating were used to obtain the data. While the results are preliminary, they suggest that the rate is complex in catalyst. It increases as the concentration is increased but above 0.5 mol % catalyst to substrate, it begins to decrease. A similar effect is also seen in the stoichiometric experiments where 2:1 or 1:1 mixtures of catalyst to substrate react very sluggishly, but the rate is increased upon the addition (5 more equivalents) of substrate. The optimum amount of catalyst to substrate, as far as reaction rate is concerned, seems to be between 0.4 and 0.5 mol %.

When looking beyond initial data points, the most important finding is that the symmetrical products ethyl acetate and benzyl benzoate follow a first order rate law of appearance at the beginning of the reaction representative first order rate law curves are given below for one reaction (Figures S7-S12). In the latter parts of the reaction this cannot hold, as equilibrium kinetics become more important. The rate law for the appearance of unsymmetrical product ethyl benzoate is complex, and there is an effective induction period (Figure S11). Since this product is more thermodynamically stable than the starting material and the symmetrical isomers (see DFT results below), we conclude that the reaction is under kinetic control. Stoichiometric experiments with a lower amount of ester confirm that ethyl benzoate will be the major product after long reaction times (see Stoichiometric NMR experiments below).

The concentration of the <sup>t</sup>OBu ion which is present in a 5x excess to the catalyst, is not sufficient to cause transesterification, the base catalyzed exchange of alcohol moieties between esters, and interfere with the overall result. Even at the highest concentration, ethyl benzoate followed the same complex rate of appearance while the other products fit well within a first order curve. We can conclude that transesterification is not a significant reaction as otherwise the mixture of products would be equal or the curve for ethyl benzoate appearance would differ significantly from the curves obtained at lower concentration.

**Table S1.** Amounts of catalyst **3** used in kinetic experiments with initial rates calculated based on EtOAc appearance from excel's linear regression function. Integration obtained from JEOL's Delta NMR software. Reactions carried out in 0.6 mL of C<sub>6</sub>D<sub>6</sub> and a constant concentration of benzyl acetate of 0.26M; heating at 50 °C with measurement intervals of 5 minutes.

| Mol % Cat | Initial rate | M (cat) |
|-----------|--------------|---------|
| 0.15      | 2.09         | 0.004   |
| 0.3       | 2.82         | 0.008   |
| 0.4       | 7.79         | 0.011   |
| 0.5       | 8.98         | 0.013   |
| 0.6       | 4.50         | 0.016   |

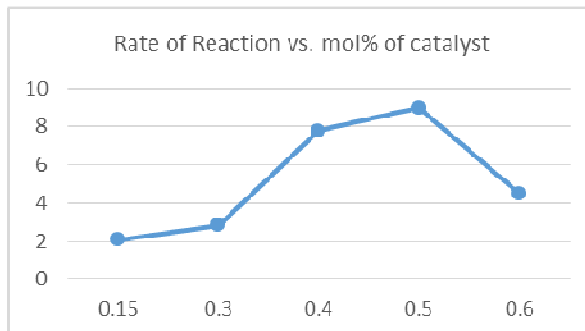

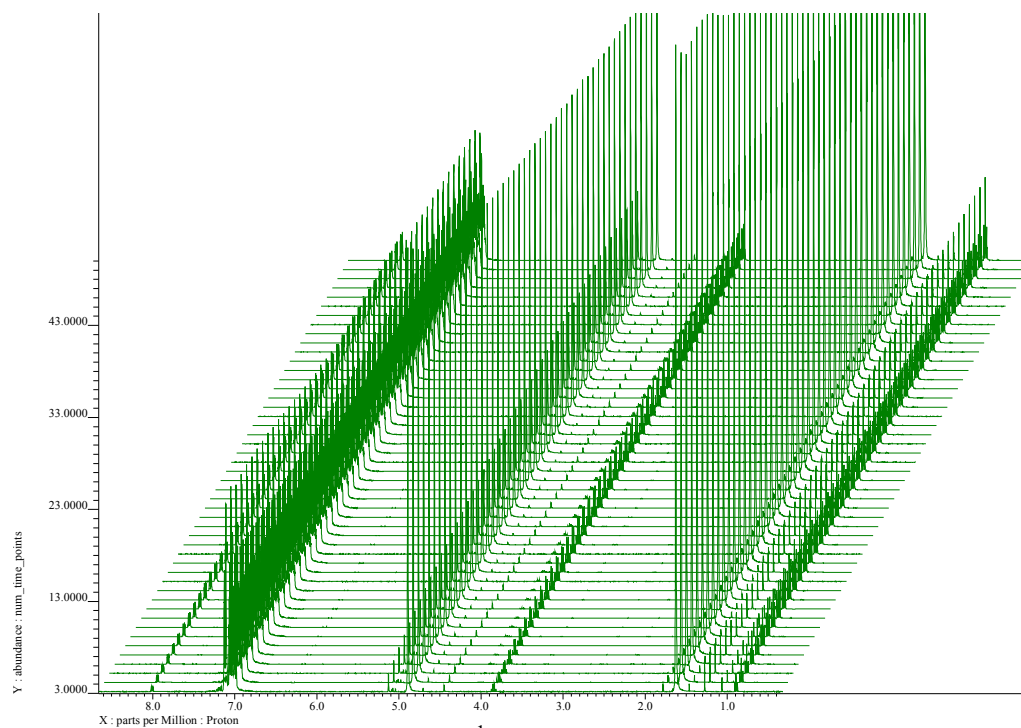

**Figure S7.** Kinetics with 1.5 mg of **3**.  $^1\text{H}$ NMR whole spectrum.

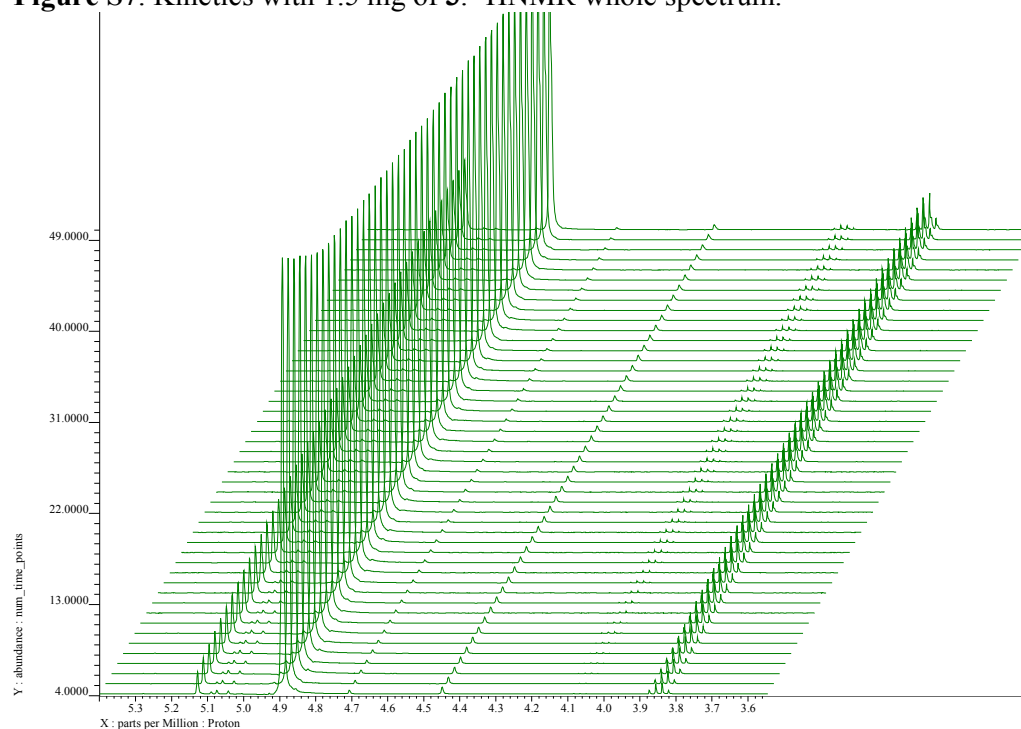

**Figure S8.** Kinetics with 1.5 mg of **3** and **19**. 3.85ppm ethyl acetate  $\alpha$   $\text{CH}_2$  of ethanol; 4.1ppm ethyl benzoate  $\alpha$   $\text{CH}_2$  of ethanol; 4.90ppm benzyl acetate  $\alpha$   $\text{CH}_2$  of benzyl alcohol; 5.13ppm benzyl benzoate  $\alpha$   $\text{CH}_2$  of benzyl alcohol.

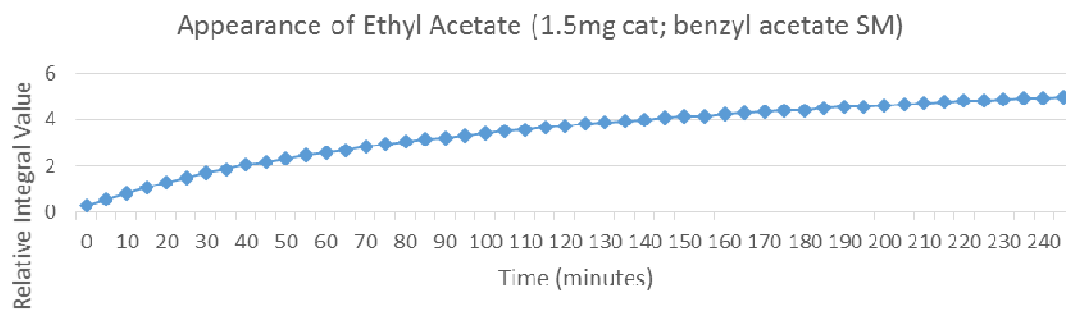

**Figure S9.** Appearance of  $\alpha$  CH<sub>2</sub> of ethyl acetate with 1.5 mg of **3**. 50 °C; measurements every 5 minutes.

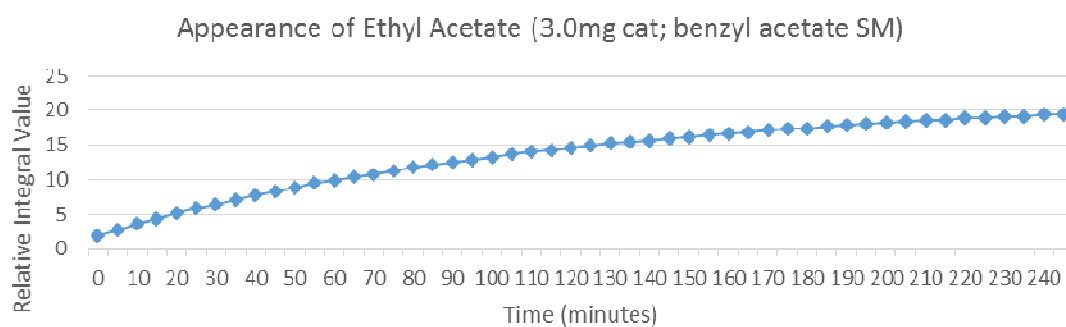

**Figure S10.** Appearance of  $\alpha$  CH<sub>2</sub> of ethyl acetate with 3.0 mg of **3**. 50 °C; measurements every 5 minutes.

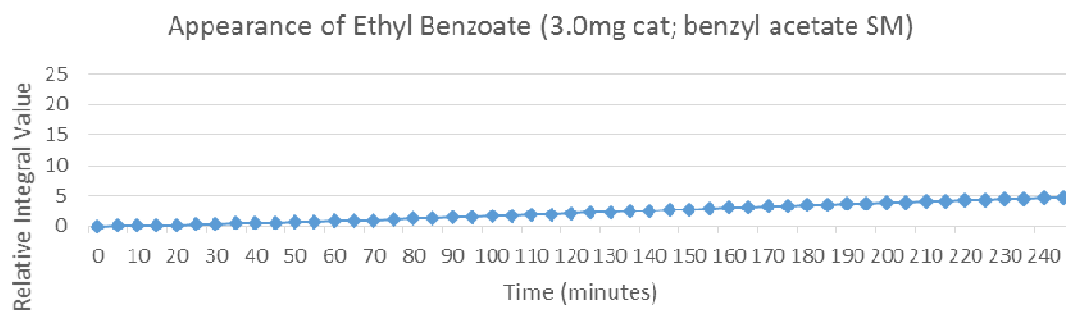

**Figure S11.** Appearance of  $\alpha$  CH<sub>2</sub> of ethyl benzoate with 3.0 mg of **3**. 50 °C; measurements every 5 minutes.

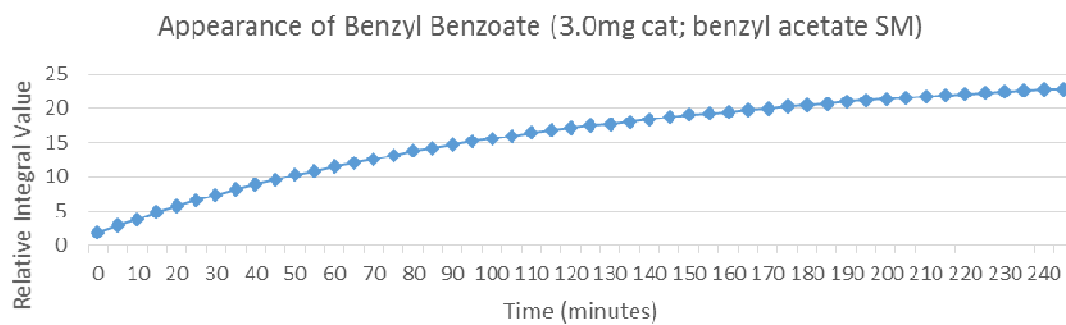

**Figure S12.** Appearance of  $\alpha$  CH<sub>2</sub> of benzyl benzoate and with 3.0 mg of **3**. 50 °C; measurements every 5 minutes.



### Kinetic NMR experiments with ethyl benzoate **20**

Only one experiment was performed with **20** in order to confirm the findings seen in the kinetic experiments performed on the mirror substrate **19**. From the experiments with benzyl acetate, it was determined that the optimum rate would be reached at ~4 mg. of catalyst in 0.6 mL of C<sub>6</sub>D<sub>6</sub> with a 250 excess of ethyl benzoate (0.26M as above, 228  $\mu$ L.). The reactants were mixed together with 1.2 equiv. of KO<sup>t</sup>Bu (4mg) in a Young tube and the kinetics were followed every 5 minutes at 50 °C (Figure S13). We could confirm that the symmetrical products benzyl benzoate and ethyl acetate appeared at the same rate (Figures S14, S16) and the rate of appearance of the unsymmetrical **19** was significantly slower (Figure S15). The reaction was too close to equilibrium for close curve fitting after one hour. Due to the starting material **20** being more thermodynamically stable than **19** and when compared to both symmetrical products, it was the most abundant compound present at the end of the reaction; as can be seen from the slowed rate for appearance of **19** after ~3h. This situation would persist indefinitely.

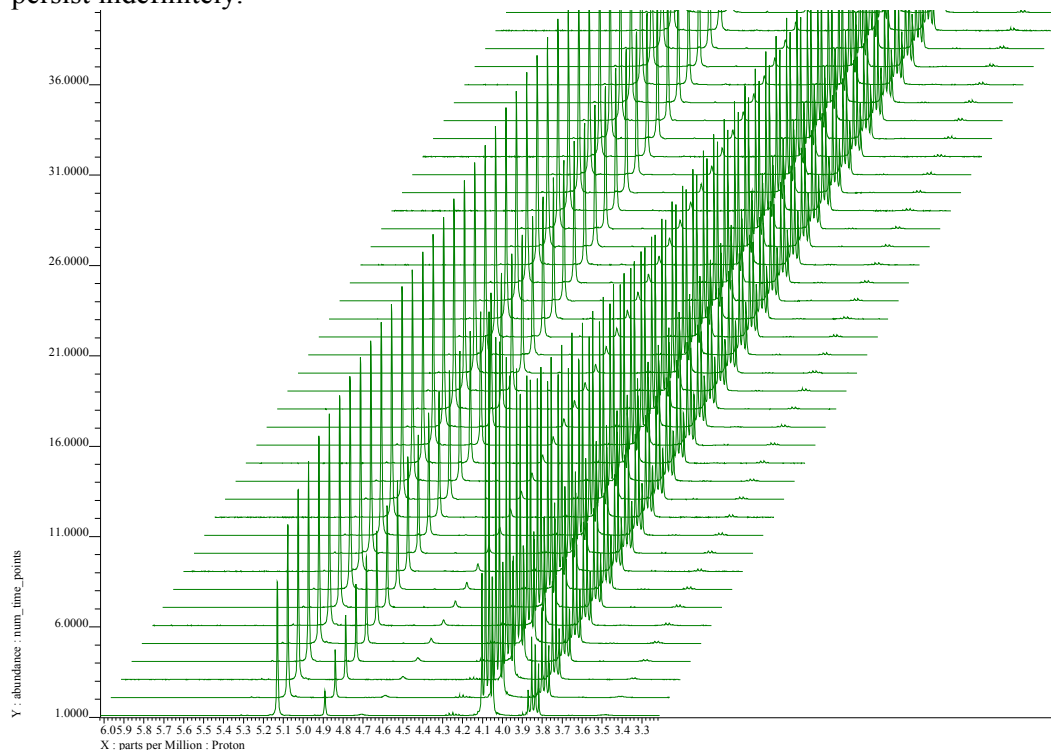

**Figure S13.** Kinetics with 4.0 mg of **3** and **20**. 3.85ppm ethyl acetate  $\alpha$  CH<sub>2</sub> of ethanol; 4.1ppm ethyl benzoate  $\alpha$  CH<sub>2</sub> of ethanol; 4.90ppm benzyl acetate  $\alpha$  CH<sub>2</sub> of benzyl alcohol; 5.13ppm benzyl benzoate  $\alpha$  CH<sub>2</sub> of benzyl alcohol.

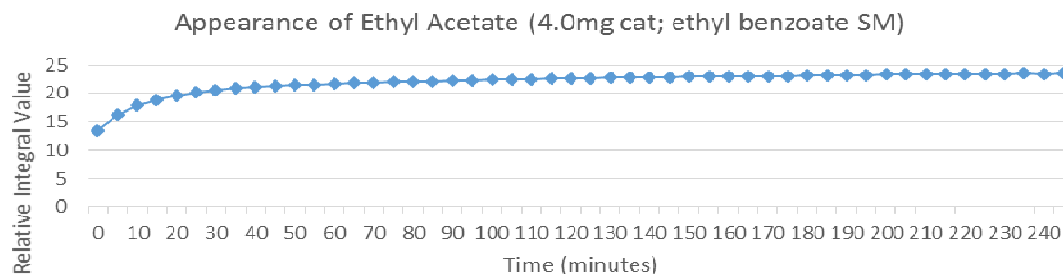

**Figure S14.** Appearance of  $\alpha$  CH<sub>2</sub> of ethyl acetate with 4.0 mg of **3**. 50 °C; measurements every 5 minutes.

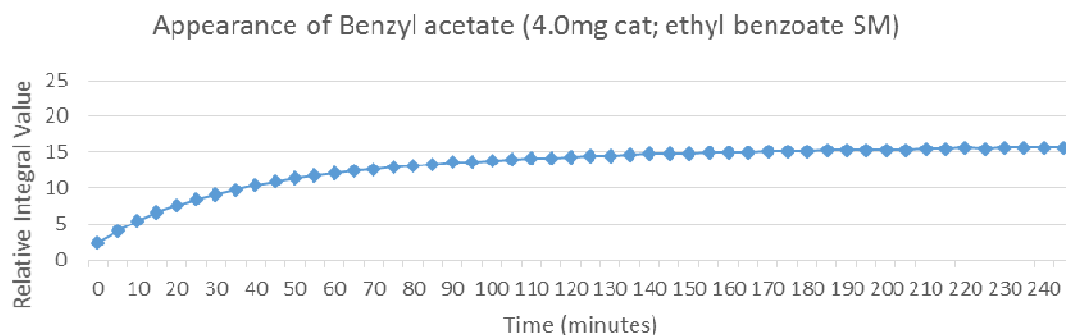

**Figure S15.** Appearance of  $\alpha$  CH<sub>2</sub> of benzyl acetate with 4.0 mg of **3**. 50 °C; measurements every 5 minutes.

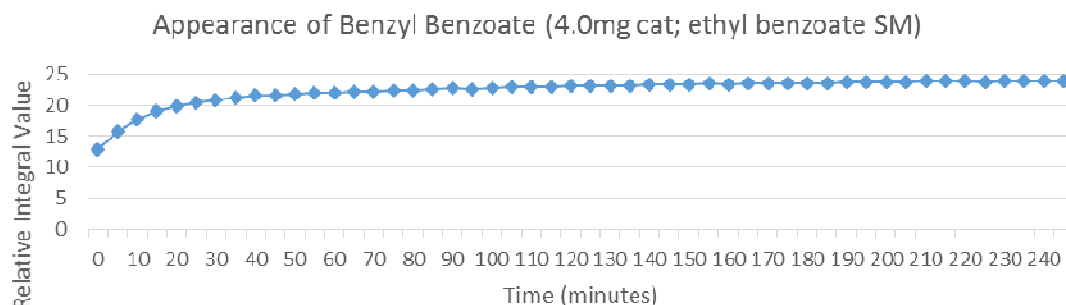

**Figure S16.** Appearance of  $\alpha$  CH<sub>2</sub> of benzyl benzoate and with 4.0 mg of **3**. 50 °C; measurements every 5 minutes.

### Stoichiometric NMR experiments

#### 1) Activation of the pre-catalyst complex **3**

10 mg of **3** (0.016 mmol) was mixed together with 2 mg of KO<sup>t</sup>Bu (0.018 mmol) in a J-Young NMR tube. 0.6 mL of C<sub>6</sub>D<sub>6</sub> was added. The mixture turned a light green color and a complex mixture of complexes is observed (Figure S17). After heating for 3 hours at 50 °C, the mixture turns a dark brown and most of the signals broaden (Figure S18). There are several trace hydrides at ~ -15ppm.

It's not surprising that the NMR pattern is complex, since **3** is known to be a mixture of isomers.<sup>2</sup> After deprotonation by base, the Cl<sup>-</sup> ligand is lost leading to the possibility of forming dimeric complexes and possibly complex equilibria. However, experiments described below allow us to conclude that the minor hydrides that we do see are side-products that are not active in the metathesis reaction. Addition of substrates to either the early green solution or the brown solution, does not change the outcome or the rate of these reactions.

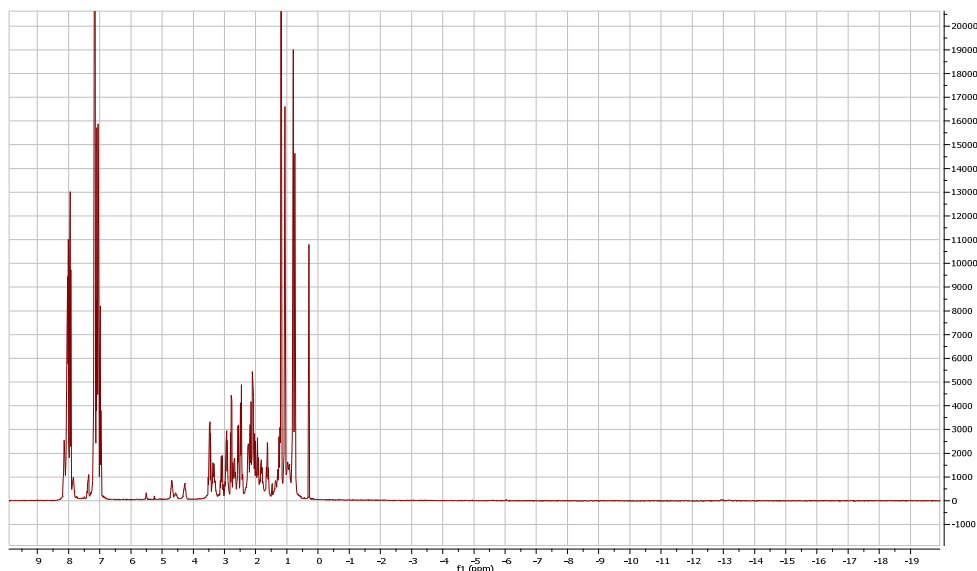

**Figure S17.**  $^1\text{H}$  NMR of **3**, soon after mixing with  $\text{KO}^t\text{Bu}$  in  $\text{C}_6\text{D}_6$ .

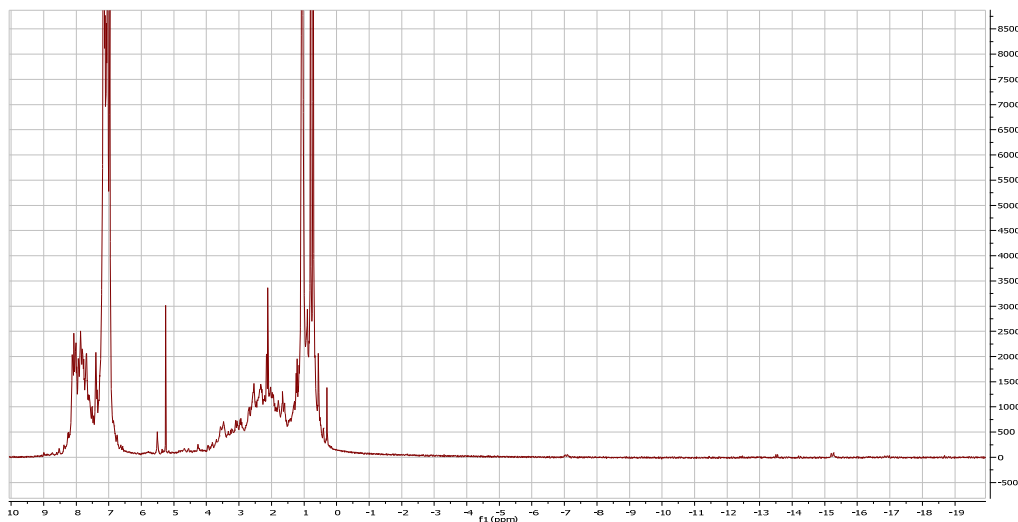

**Figure S18.**  $^1\text{H}$  NMR of **3**, 3 hours after mixing with  $\text{KO}^t\text{Bu}$  in  $\text{C}_6\text{D}_6$  and heating at  $50\text{ }^\circ\text{C}$ .

## 2) Reaction of activated **3** with benzyl acetate **19**

Adding 0.5 equiv. of benzyl acetate **19** to activated complex **3** (10 mg in 0.6 mL of  $\text{C}_6\text{D}_6$  activated with 2 mg of  $\text{KO}^t\text{Bu}$ ) surprisingly does not lead to a fast metathesis reaction. Even after standing for three hours at room temperature and ten minutes of heating at  $50\text{ }^\circ\text{C}$ , a very small amount of metathesis is seen (Figure S19). Adding the ester substrate to the brown mixture, does not affect the hydride pattern, but does lead to metathesis. In case of the green mixture, a new minor hydride pattern is generated upon addition of ester, but the metathesis reaction still occurs without a change in that second pattern. This does not prove that hydrides are not involved in metathesis, but along with them being present as trace species, makes it highly unlikely. The slow rate of metathesis when only 0.5 equiv. of **19** are used can be contrasted with the kinetic experiments where at the higher concentration of catalyst, already a few TONs are observed at room temperature ( $\sim 200$  equiv. of substrate) before reaction heating is started. Adding another 0.5 equiv. of benzyl acetate does not increase the slow

reaction rate, however it can be verified that the ester is not affected by the complexes, as the intensity of the signals of the ester changes by two times with respect to  $C_6D_6$ . It is thus unlikely that decomposition of the ester as a sacrificial substrate is necessary to generate the active species for metathesis (Figure S20).

After letting this mixture stand for 12 hours overnight at ambient temperature, NMR shows that complete metathesis has taken place. The major ester present is ethyl benzoate **20**, which is the thermodynamic product (Figure S21). After adding 5 more equivalents of benzyl acetate and letting the solution stand at r.t. for three hours, complete metathesis is seen, although the product distribution is more equal (Figure S22). This can be contrasted to using only 0.5 equiv. of ester, where three hours at r.t. resulted in a very slow reaction. Increasing the ester concentration when ester concentration is initially close to that of the catalyst, thus increases the rate of catalysis. Heating the reaction with now 6 equivalents of ester total for another 2 hours at 50 °C, regenerates the distribution pattern where **20** is the major product.

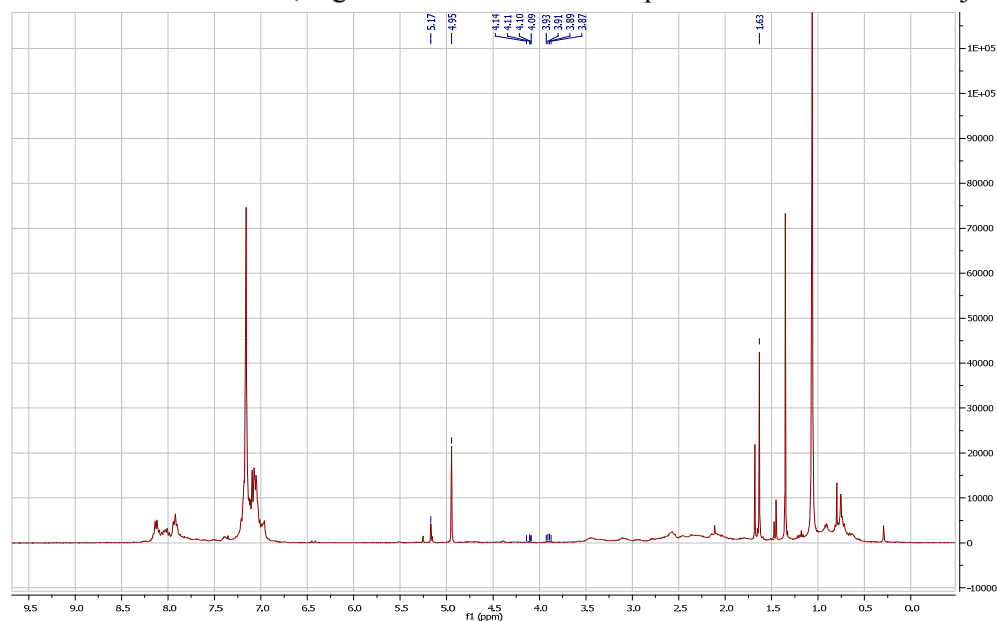

**Figure S19.**  $^1H$  NMR of **3** with 0.5 equiv of benzyl acetate after 10 minutes of heating at 50 °C. 3.90ppm quartet ethyl acetate  $\alpha$   $CH_2$  of ethanol; 4.1ppm quartet of ethyl benzoate  $\alpha$   $CH_2$  of ethanol; 4.95ppm benzyl acetate  $\alpha$   $CH_2$  of benzyl alcohol; 5.17ppm benzyl benzoate  $\alpha$   $CH_2$  of benzyl alcohol.

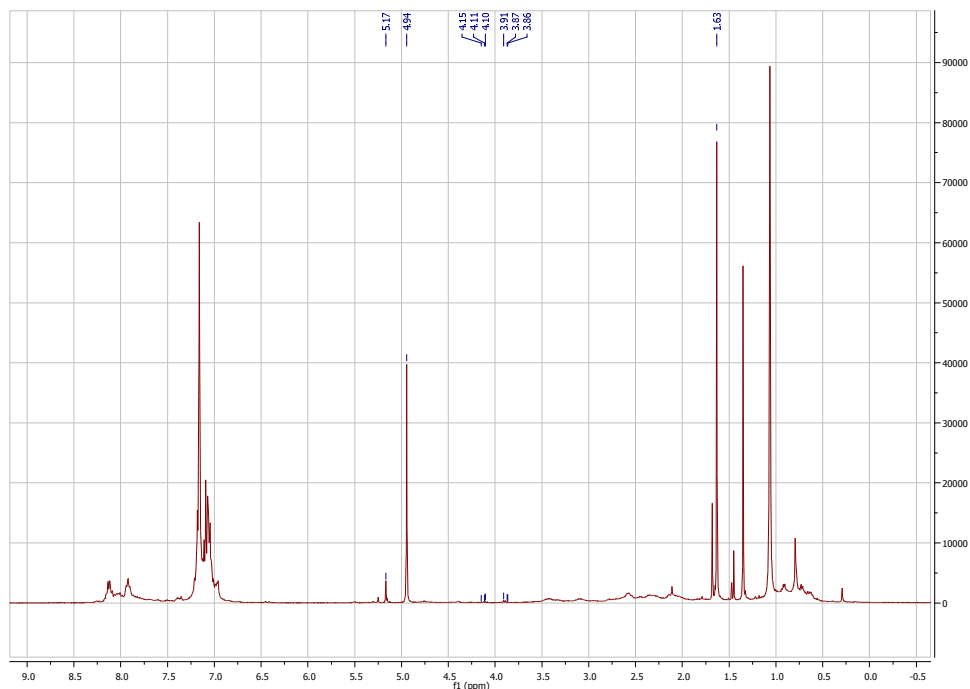

**Figure S20.** <sup>1</sup>H NMR of **3** with 1equiv of benzyl acetate after 10 minutes of heating at 50 °C. 3.90ppm quartet ethyl acetate α CH<sub>2</sub> of ethanol; 4.1ppm quartet of ethyl benzoate α CH<sub>2</sub> of ethanol; 4.95ppm benzyl acetate α CH<sub>2</sub> of benzyl alcohol; 5.17ppm benzyl benzoate α CH<sub>2</sub> of benzyl alcohol.

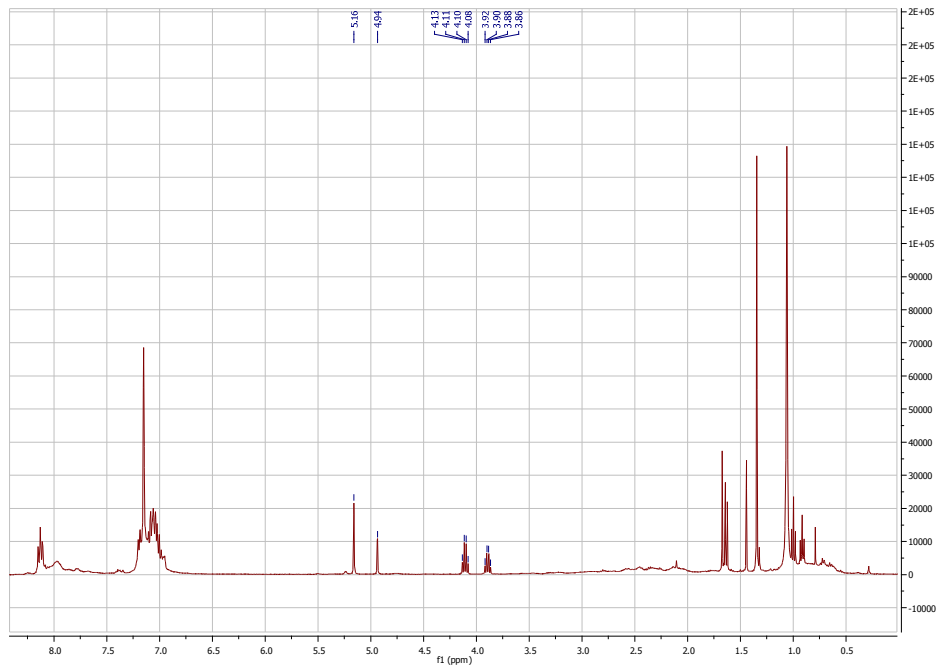

**Figure S21.** <sup>1</sup>H NMR of **3** with 1equiv of benzyl acetate after overnight at r.t. 3.90ppm quartet ethyl acetate α CH<sub>2</sub> of ethanol; 4.1ppm quartet of ethyl benzoate α CH<sub>2</sub> of ethanol; 4.95ppm benzyl acetate α CH<sub>2</sub> of benzyl alcohol; 5.17ppm benzyl benzoate α CH<sub>2</sub> of benzyl alcohol.

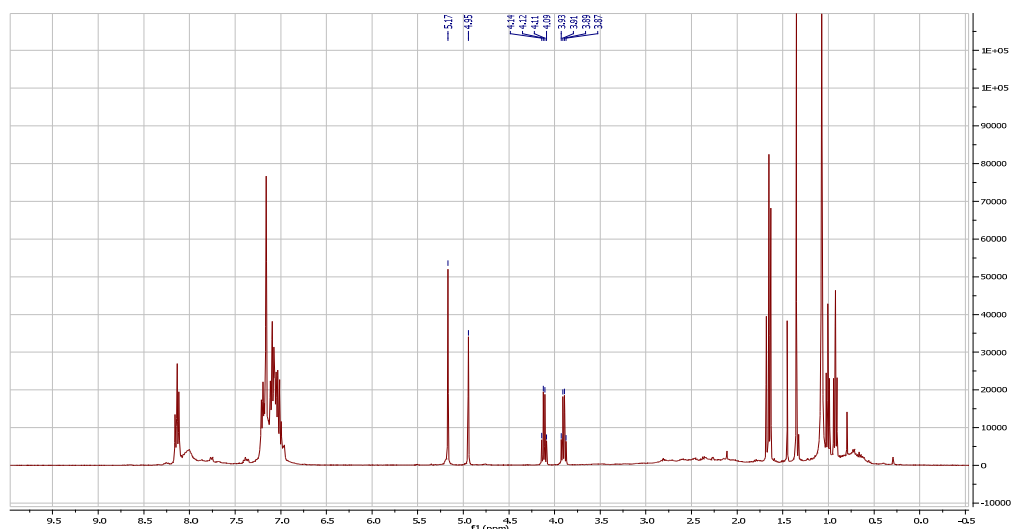

**Figure S22.**  $^1\text{H}$  NMR solution from Figure S17 after adding 5 more equiv of benzyl acetate and leaving at r.t. for 3 hours. 3.90ppm quartet ethyl acetate  $\alpha$   $\text{CH}_2$  of ethanol; 4.1ppm quartet of ethyl benzoate  $\alpha$   $\text{CH}_2$  of ethanol; 4.95ppm benzyl acetate  $\alpha$   $\text{CH}_2$  of benzyl alcohol; 5.17ppm benzyl benzoate  $\alpha$   $\text{CH}_2$  of benzyl alcohol.

### 3) Reaction of activated **3** with ethyl benzoate **20**

In order to have one parallel reaction to the stoichiometric experiment carried out with **19**, Activated complex **3** (10 mg in 0.6 mL of  $\text{C}_6\text{D}_6$  activated with 2 mg of  $\text{KO}^t\text{Bu}$ ) was used with 6 equiv. of **20** (13.6  $\mu\text{L}$ ). After 15 minutes at room temperature, only trace signals of metathesis products can be observed (Figure S23), with ethyl acetate  $\alpha$   $\text{CH}_2$  signal being obscured by the carbon satellites of the starting material. After 4.5 hours of heating at 50  $^\circ\text{C}$ , metathesis is observed (Figure S24), however the amount of the products is a lot less than that observed in Figures S13-S16, where 250 equiv. of **20** were used and the corresponding concentration of the ester was a lot higher.

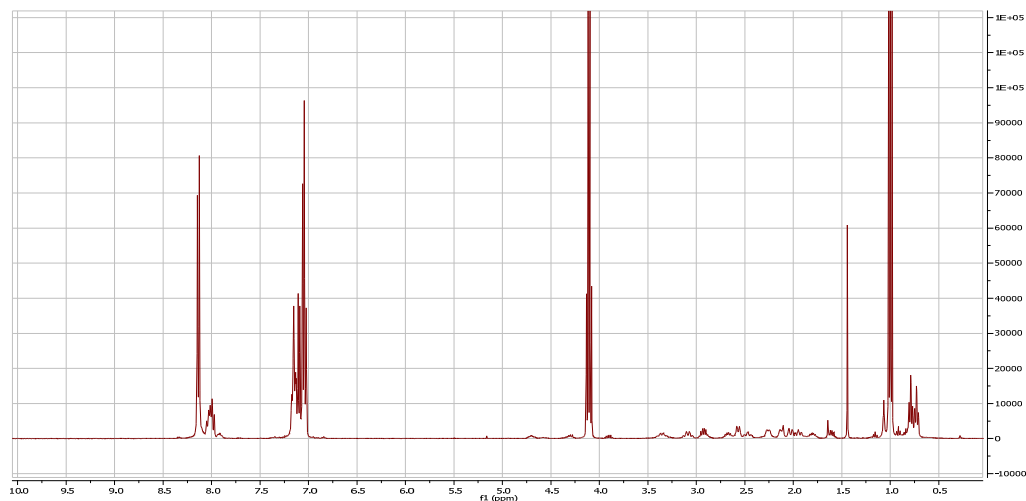

**Figure S23.**  $^1\text{H}$  NMR of **3** with 6 equiv. of **20**, 15 minutes after mixing at r.t. 3.90ppm quartet ethyl acetate  $\alpha$   $\text{CH}_2$  of ethanol obscured by carbon satellite of **20**; 4.1ppm quartet of ethyl benzoate  $\alpha$   $\text{CH}_2$  of ethanol

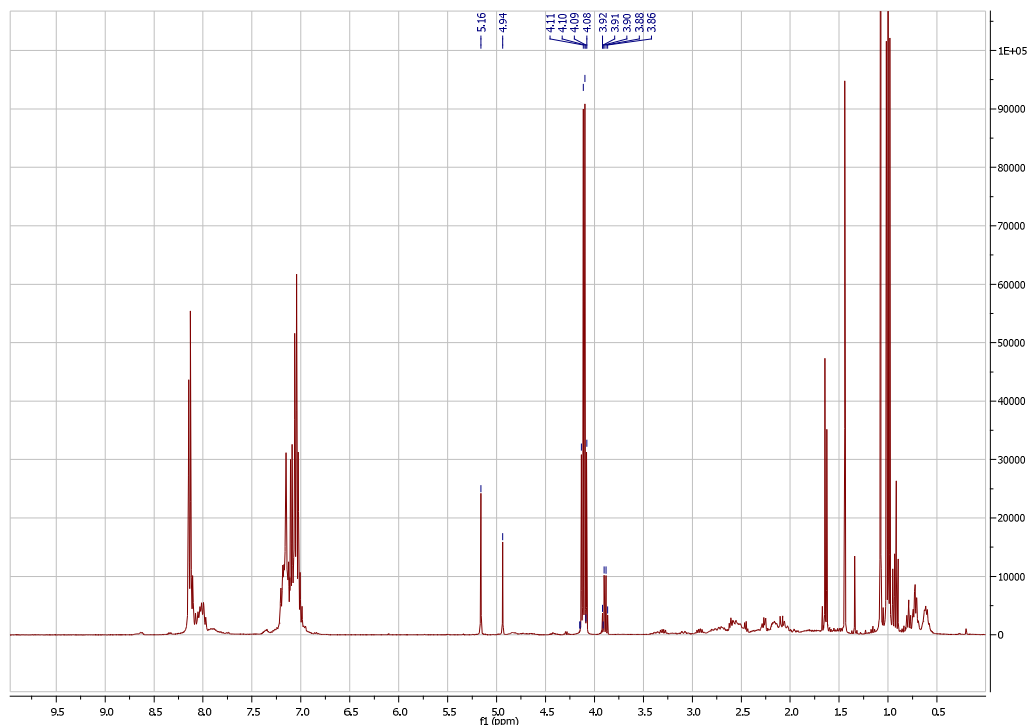

**Figure S24.**  $^1\text{H}$  NMR of **3** with 6 equiv. of **20**, 4.5 hours after heating. 3.90ppm quartet ethyl acetate  $\alpha$   $\text{CH}_2$  of ethanol; 4.1ppm quartet of ethyl benzoate  $\alpha$   $\text{CH}_2$  of ethanol; 4.95ppm benzyl acetate  $\alpha$   $\text{CH}_2$  of benzyl alcohol; 5.17ppm benzyl benzoate  $\alpha$   $\text{CH}_2$  of benzyl alcohol.

#### 4) Reaction of activated **3** with benzyl benzoate **18**

As in the above case with benzyl acetate, the symmetrical substrate benzyl benzoate was added in the same amounts of 0.5 equiv., another 0.5 equiv., and finally 5 equiv. The intervals between additions and the heating periods were the same as the reactions were done in parallel. The symmetrical substrate cannot show any metathesis and the reaction was done to confirm that the complex generates the same pattern of signals during the course of the reaction and that there is no significant decomposition from an interaction of the ester and the metal complex in order to generate a presumably active species. The intensity of the benzylic protons follows the order of addition when compared to  $\text{C}_6\text{D}_6$  and is not degraded after heating periods.

## Mechanistic Conclusions

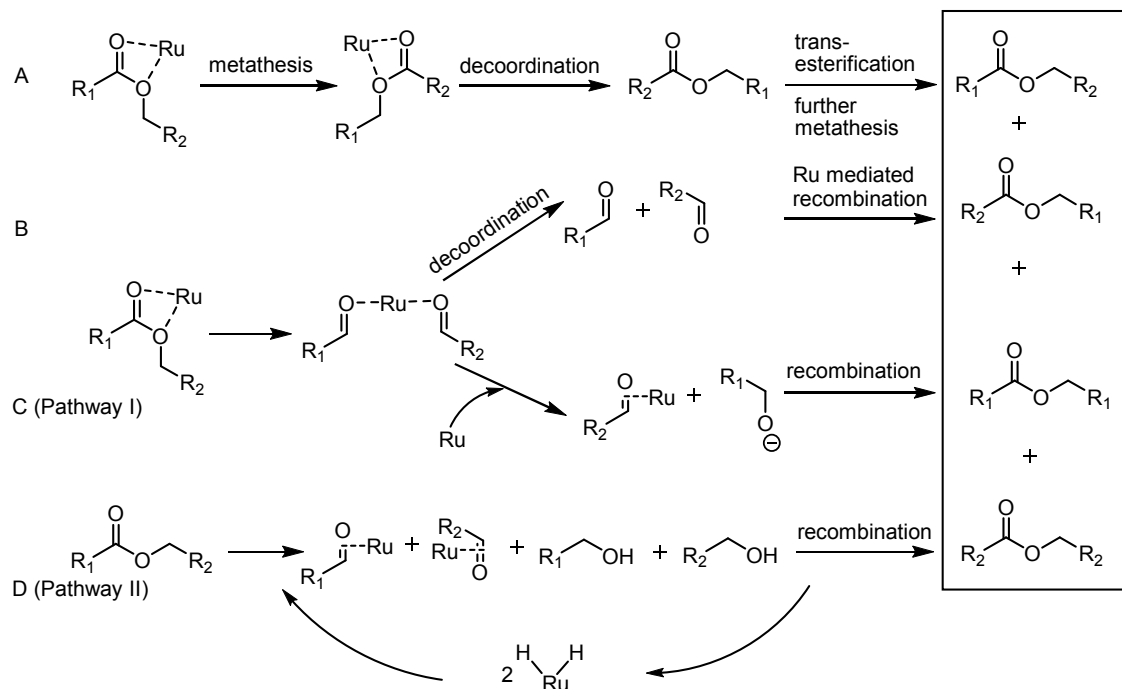

## Deuteration Experiment

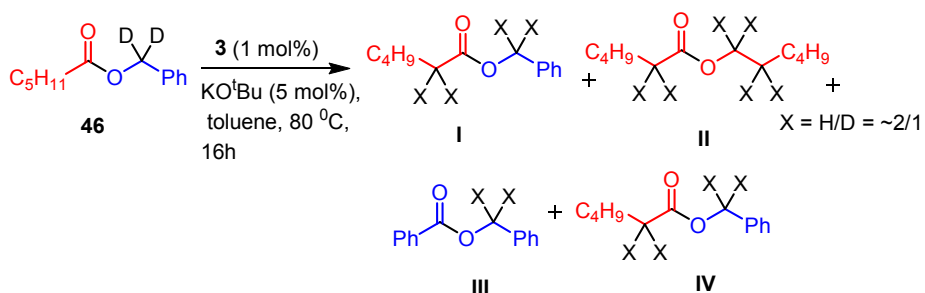

## Pathway C that results in faster appearance of symmetrical products

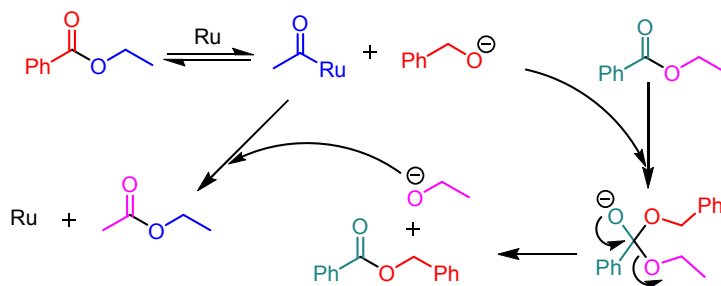

**Figure S25.** Mechanistic Figure from the main text with deuteration experiment included. Pathways C and D are I and II respectively in the main text.



The experiment on 2D-benzylhexanoate **46** gave deuteration in the  $\beta$  carbon position of the hexyl moiety to an equal extent with all the  $\alpha$  carbons. It is known that this scrambling can occur in aldehydes via the intermediacy of keto-enol tautomerism, which can be catalyzed by bases, though an ester enolate cannot be ruled out as the mechanism for scrambling the label into the  $\beta$  position. The presence of an intermediate aldehyde that can be captured by another reactant has been assumed in the synthesis of olefins from alcohols.<sup>4,5</sup> The evidence suggests the intermediacy of aldehyde or alcohol-like species that are either free in solution or are bound to the complex, and rules out the one-center pathway A. Although pathway A can also be ruled out via the kinetic experiments, as the unsymmetrical product should appear much more rapidly than the symmetrical esters and this is not the case.

Path B involves the separation of the ester into component parts: free aldehydes in solution which are then reformed, resulting in the appearance of the products. However, free aldehydes are not detected as trace species via <sup>1</sup>H NMR or by sampling the reaction mixture by GC/MS. A previous mechanistic report with the Milstein catalyst system also showed that free aldehyde will coordinate rapidly to the activated Ru species, and the resulting complexes are believed to be intermediates in catalytic alcohol dehydrogenative coupling.<sup>6</sup> Also, all products should form in equal rates if pathway B is followed, but this is not the case.

We could not differentiate between pathways B and C (pathway I in the main text) by stoichiometric experiments as we do not observe changes in the complex organometallic mixture when reacting activated complex **3** and **1** or **20**. Either free aldehyde or alcohol cannot be ruled out, but they were not present in sufficient amounts to be observed by NMR, although metathesis is observed. However, the kinetic experiments lead us to propose pathway C as the active mechanism. As mentioned above in ruling out pathways A and B, when reacting **3** and **19**, we can see that the two symmetrical products ethyl acetate and benzyl benzoate appear at equal rates following pseudo first-order kinetics, much more rapidly than the unsymmetrical product **20**, which has an infective ‘induction period’ before starting to appear in the reaction.

Pathway C is involves one part of the ester remaining coordinated to the Ru complex, while the other is released as an alkoxy species. **20** is more stable than **19** by ~1.8 kcal/mol and is ~1.0kcal/mol more stable than the two symmetrical species (see SI for gas phase DFT results). After long reaction times, **20** is the major species present in the reaction mixture as expected from thermodynamics. Moreover, when the reverse reaction is performed, with **20** as the starting material, the symmetric products also appear at the same rate and faster than unsymmetrical product **19**. While the reverse reaction now does follows the thermodynamic profile, it is also the exact mirror of the reaction with **19**, which does not.

Initial rates in catalyst found that the rate is complex and rises slowly until ~0.4mol% of catalyst, after which it begins to decrease. Most dramatically, a reaction with 18mol% of catalyst and **20** showed significantly slower activity (~30% metathesis efficiency after 4.5 hours at 80°C) than a reaction set up with only 0.4mol% catalyst (full metathesis after 4.5 hours at 50°C). The same decrease of activity was observed when performing the reaction with **19** as the starting ester. A pictorial explanation for how symmetrical products might be preferred in pathway C, and why free ester accelerates the reaction, is presented in the bottom panel of Figure S25. Both the concentration of free ester and the amount of active catalyst are important in the reaction. As presented, if the first step is reversible, there is a maximum catalyst loading beyond which the rate should not increase.

Symmetrical products are formed initially according to this pathway, and the unsymmetrical product can be generated when the catalyst subsequently reacts with these symmetrical products. In the case of **20** as starting material, **19** can be generated after reaction between the catalyst and ethyl acetate. Importantly, an acyl Ru species that is suggested by the mechanism also helps explain the rapid deactivation of the catalyst when

methyl esters are involved, as this pathway would lead to covalently bound HCO-Ru that is easily converted to CO. It is unlikely that these types of organometallic species (RCO-Ru) would be tolerant of other functional groups as well.

It is also possible that a trace amounts of catalyst converted to a dihydride complex is active in the metathesis reaction by converting the ester into alcohol constituent parts (i.e. ester hydrogenation occurs, followed by dehydrogenative alcohol coupling) according to pathway D (pathway II in the main text). The trace dihydride species can be generated from dehydrogenation of ester; or from trace impurities. However, esters where dehydrogenation is highly unlikely, such as an aryl/aryl ester, and **19** or **20** (Table 3, entries 4-5) on which kinetic experiments were done, did not decompose to a detectable extent even at high catalyst concentration, and showed no interaction with the active catalyst even at stoichiometric loadings on the NMR timescale, suggesting that impurities or ester CH activation can be ruled out in the one component metathesis reaction.

On the other hand, in the hydrogenation reaction where ethanol or other alcohols are used, the dihydride complex can easily form from ethanol, even at -80°C as reported by Milstein.<sup>6</sup> Adding one equivalent of benzyl alcohol to activated catalyst **3** at room temperature does lead to what is apparently a coordinated aldehyde complex with two broad peaks at 2.6 and 4.6ppm, but no benzyl benzoate product. Benzyl alcohol retards the rate of the metathesis reaction in comparison to an NMR reaction set up without benzyl alcohol. Adding 5 eq. of **19** to this mixture and heating for 50°C for one hour leads a measurably slower rate of metathesis compared to a mixture with the same concentration of all reactants, but without benzyl alcohol. This result helps explain the experimental finding that hydrogenation with benzyl alcohol gives poorer results than hydrogenation with ethanol.

Even if a dihydride complex does not form upon the addition of ethanol, free hydrogen is released in the ethanol coupling reaction to form ethyl acetate, where the first turnover is observed even at low temperatures.<sup>6</sup> The presence of free H<sub>2</sub> from excess alcohol in the closed reaction system opens up an opportunity for Ru dihydride complex formation *in-situ*. An alternative pathway may thus be available for ester scrambling during the hydrogenation reaction. The activity of some substrates in hydrogenation that proved to be inactive in metathesis, as well the dramatic improvement in the activity of catalyst **4**, suggests that both pathways C and D can be active in transfer hydrogenation of esters, and it is likely that only pathway C is active in one-component ester metathesis.

A final note must be made on the trans-esterification reaction catalyzed by KO<sup>t</sup>Bu where two esters react according to the following equation: R<sub>1</sub>COOR<sub>2</sub> + R<sub>3</sub>COOR<sub>4</sub> → R<sub>1</sub>COOR<sub>2</sub> + R<sub>3</sub>COOR<sub>4</sub> + R<sub>1</sub>COOR<sub>4</sub> + R<sub>3</sub>COOR<sub>2</sub>. This reaction has been described previously.<sup>7</sup> This is a completely different reaction from the one described by us as no reduction or oxidation of R<sub>1</sub>-R<sub>4</sub> fragments takes place. It is true that rapid trans-esterification can facilitate scrambling once metathesis has occurred, and pathway C requires attack of a primary alkoxide on an ester to generate another primary alkoxide, which is immediately consumed by the Ru intermediate. There is an excess of a tertiary alkoxide in the reaction mixture, however under our reaction conditions this <sup>t</sup>O<sup>t</sup>Bu catalyzed transesterification is not as rapid as metathesis at 80°C. This can be seen in the GC traces for the transfer hydrogenation of esters, for example Figure S46 in the SI, where significant amounts of hexyl ethanoate are detected in the presence of a large excess of ethanol and some extra equivalents of KO<sup>t</sup>Bu. Most importantly, we found no change in the metathesis reaction outcome when using KHMDS, a very bulky base that is very unlikely to participate in trans-esterification, when compared to KO<sup>t</sup>Bu.

## DFT energies and optimized geometries (Cartesian coordinates)

### Benzyl Acetate

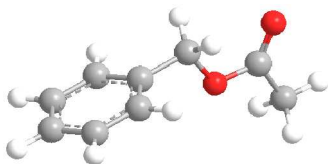

```
C  -0.40512506 -0.60763873 -0.44748291
C   0.91792360  0.10836580 -0.41067908
H   0.85986648  1.10030188 -0.88106929
O   1.30058547  0.28353672  0.99162179
C   2.50604524  0.89236956  1.18459132
C  -0.45786843 -2.01039917 -0.39257613
C  -1.68669050 -2.67776999 -0.41742976
C  -2.87914643 -1.94783975 -0.50209768
H   1.70972287 -0.46451535 -0.91447642
C   2.81059938  1.01555191  2.66110067
O   3.22109690  1.27412522  0.27677648
H   3.77940366  1.50729827  2.79236228
H   2.82765128  0.01986795  3.12630964
H   2.02277539  1.59646938  3.16103756
C  -2.83701446 -0.54966423 -0.56054761
C  -1.60597779  0.11502277 -0.53295612
H   0.47160479 -2.58115466 -0.33090756
H  -1.71436567 -3.76818422 -0.38060734
H  -3.83814317 -2.46802111 -0.52990423
H  -3.76307324  0.02334753 -0.63251080
H  -1.57409232  1.20594920 -0.58140280
```

### Benzyl Benzoate

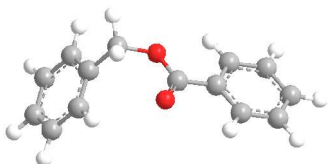

```
C   1.08699144 -0.63256646 -0.97871969
C   2.52743151 -0.80545030 -0.56194733
H   3.18263070 -0.09371253 -1.08034616
O   2.69737017 -0.62287970  0.88165637
C   3.02441255  0.63371949  1.29753902
C   0.21214396 -1.73169559 -0.97771871
C  -1.12625759 -1.57653001 -1.35451124
C  -1.60259893 -0.31696814 -1.73856363
H   2.86900049 -1.83303230 -0.74164447
C   3.16643624  0.71151855  2.78442480
O   3.18689259  1.57964597  0.54169205
C   3.50697583  1.95480235  3.34532070
C   3.65453580  2.08295328  4.72803677
C   3.46424996  0.97086437  5.55939347
C  -0.73651772  0.78379946 -1.74548134
C   0.60164540  0.62801855 -1.36812946
H   0.58467660 -2.71590705 -0.68334502
H  -1.79673375 -2.43779460 -1.35176401
H  -2.64606131 -0.19432618 -2.03420464
H  -1.10344210  1.76605120 -2.04864956
```

|   |            |             |             |
|---|------------|-------------|-------------|
| H | 1.27939917 | 1.48347750  | -1.36421620 |
| C | 3.12449114 | -0.26963732 | 5.00420221  |
| C | 2.97513333 | -0.40297090 | 3.62072156  |
| H | 3.64945136 | 2.80654376  | 2.67929936  |
| H | 3.91795159 | 3.05013518  | 5.15904128  |
| H | 3.58048902 | 1.07105213  | 6.64008311  |
| H | 2.97454695 | -1.13560422 | 5.65102346  |
| H | 2.70939560 | -1.36519046 | 3.18441930  |

Ethyl Acetate

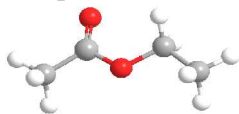

14

|   |             |             |             |
|---|-------------|-------------|-------------|
| C | -0.61340347 | -0.44730613 | 0.07378975  |
| C | 0.61302004  | 0.43777972  | 0.05464133  |
| O | 0.65776868  | 1.57755490  | -0.36918082 |
| O | 1.69294010  | -0.22028842 | 0.56483431  |
| C | 2.94012946  | 0.53170527  | 0.55870282  |
| H | -0.69023838 | -0.99300803 | 1.02304863  |
| H | -0.53337417 | -1.19257183 | -0.73192322 |
| H | -1.50567582 | 0.16454872  | -0.09292685 |
| C | 4.01593409  | -0.36087427 | 1.15114584  |
| H | 2.79664411  | 1.45212920  | 1.14360709  |
| H | 3.16802541  | 0.82380997  | -0.47706794 |
| H | 4.97511936  | 0.17691083  | 1.16039792  |
| H | 4.14113460  | -1.27698313 | 0.55734683  |
| H | 3.77035397  | -0.64434379 | 2.18404732  |

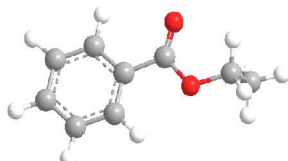

Ethyl Benzoate

|   |             |             |             |
|---|-------------|-------------|-------------|
| C | 0.12167731  | -0.29031154 | -1.12638516 |
| C | 0.46637712  | 0.39218966  | 0.19025819  |
| O | 1.89470520  | 0.65827425  | 0.29260418  |
| C | 2.65822223  | -0.35575153 | 0.79014352  |
| C | 4.10829793  | 0.00712038  | 0.84461914  |
| O | 2.20446123  | -1.43066217 | 1.15111676  |
| C | 4.59105212  | 1.25776019  | 0.41897180  |
| C | 5.95835169  | 1.53885434  | 0.49193092  |
| C | 6.84917635  | 0.57794113  | 0.98749820  |
| C | 6.37067582  | -0.66870068 | 1.41259137  |
| C | 5.00545626  | -0.95395601 | 1.34230040  |
| H | 0.46462789  | 0.30808274  | -1.98200334 |
| H | -0.96974281 | -0.40767113 | -1.20384703 |
| H | 0.57738268  | -1.28766704 | -1.18044722 |
| H | 0.16063817  | -0.21970356 | 1.04953432  |
| H | 0.00373555  | 1.38548626  | 0.26240806  |
| H | 3.89423110  | 2.00097310  | 0.03280460  |
| H | 6.33028193  | 2.50976664  | 0.16051218  |
| H | 7.91631309  | 0.80068311  | 1.04261461  |
| H | 7.06310977  | -1.41775686 | 1.80009318  |
| H | 4.61009537  | -1.91669527 | 1.66830932  |

| number | Compound                   | ZPVE(kcal/mol) | E(Hartrees) | E(kcal/mol)  | E0(Hartrees) | E0(kcal/mol) | G(kcal/mol) |
|--------|----------------------------|----------------|-------------|--------------|--------------|--------------|-------------|
| A      | ethyl<br>acetate<br>benzyl | 71.7036        | -59.53448   | -37364.37546 | -59.420214   | -37292.66109 | 50.94       |
| B      | acetate<br>ethyl           | 103.9837       | -89.099852  | -55919.86901 | -88.934143   | -55815.86855 | 79.7341     |
| C      | benzoate<br>benzyl         | 104.6466       | -89.103976  | -55922.45727 | -88.937212   | -55817.79469 | 81.5611     |
| D      | benzoate                   | 137.1105       | -118.670021 | -74478.37321 | -118.451522  | -74341.24127 | 110.2215    |

### Computational details.

Theoretical calculations in this work have been performed using density functional theory (DFT) method,<sup>8</sup> specifically functional PBE,<sup>9</sup> implemented in an original program package “Priroda”.<sup>10,11</sup> In PBE calculations relativistic Stevens-Basch-Krauss (SBK) effective core potentials (ECP)<sup>12</sup> optimized for DFT-calculations have been used. Basis set was 311-split for main group elements with one additional polarization *p*-function for hydrogen. Full geometry optimization has been performed without constraints on symmetry. For all species under investigation frequency analysis has been carried out. All minima have been checked for the absence of imaginary frequencies.

## GC/FID spectra of metathesis and hydrogenation reactions

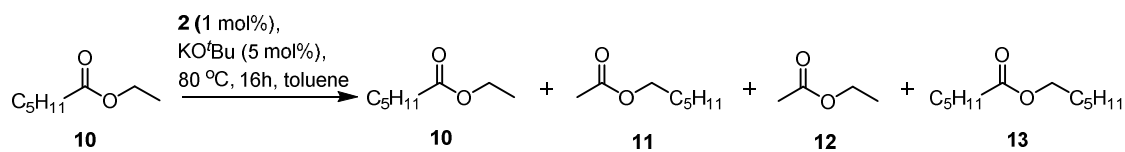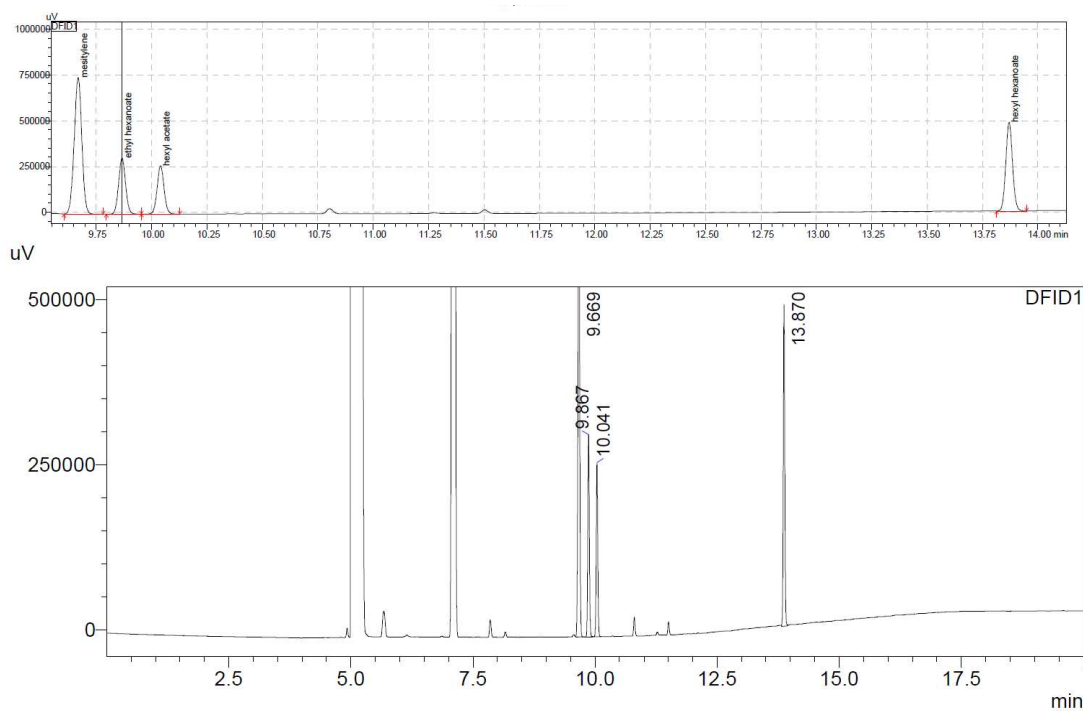

### <Peak Table>

| Peak# | Ret. Time | Area    | Height  | Conc.  | Unit | Mark | Name            |
|-------|-----------|---------|---------|--------|------|------|-----------------|
| 1     | 9.669     | 1786215 | 740858  | 43.979 | ppm  | V    | mesitylene      |
| 2     | 9.867     | 668937  | 302887  | 16.470 | ppm  |      | ethyl hexanoate |
| 3     | 10.041    | 570336  | 262418  | 14.042 | ppm  | V    | hexyl acetate   |
| 4     | 13.870    | 1036024 | 477682  | 25.508 | ppm  | V    | hexyl hexanoate |
| Total |           | 4061512 | 1783845 |        |      |      |                 |

% efficiency of metathesis calculated based on the difference between two esters **11** and **10** with respect to internal standard and conversion factor.

**Figure S26.** GC chromatograph (Table-1, entry-1)

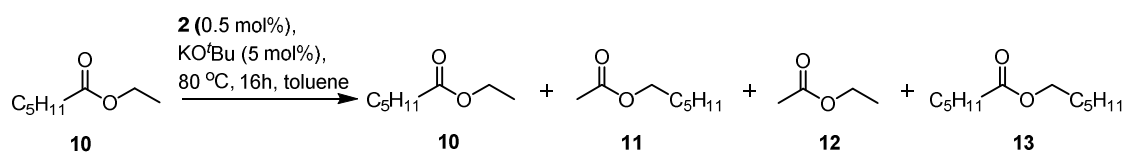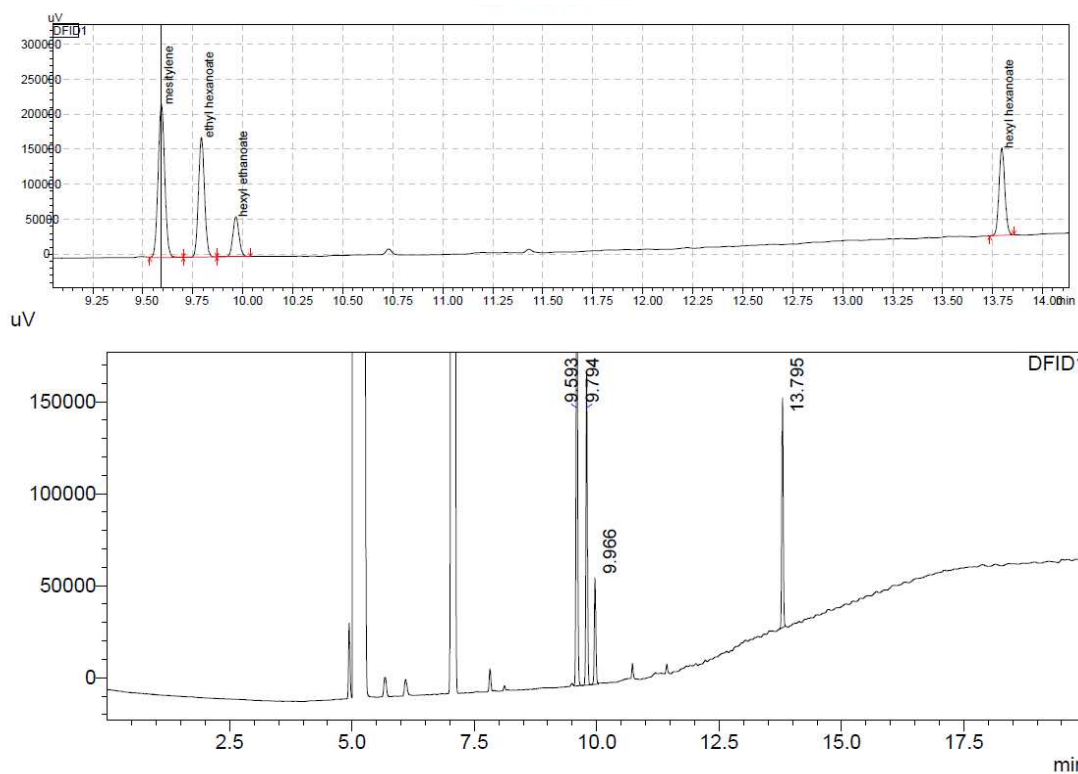

#### <Peak Table>

| Peak# | Ret. Time | Area    | Height | Conc.  | Unit | Mark | Name            |
|-------|-----------|---------|--------|--------|------|------|-----------------|
| 1     | 9.593     | 504061  | 217959 | 40.498 | ppm  | V    | mesitylene      |
| 2     | 9.794     | 361978  | 169915 | 29.083 | ppm  | V    | ethyl hexanoate |
| 3     | 9.966     | 125921  | 56995  | 10.117 | ppm  | V    | hexyl ethanoate |
| 4     | 13.795    | 252696  | 123029 | 20.302 | ppm  | M    | hexyl hexanoate |
| Total |           | 1244656 | 567899 |        |      |      |                 |

% efficiency of metathesis calculated based on the difference between two esters **11** and **10** with respect to internal standard and conversion factor.

**Figure S27.** GC chromatograph (Table-1, entry-2)

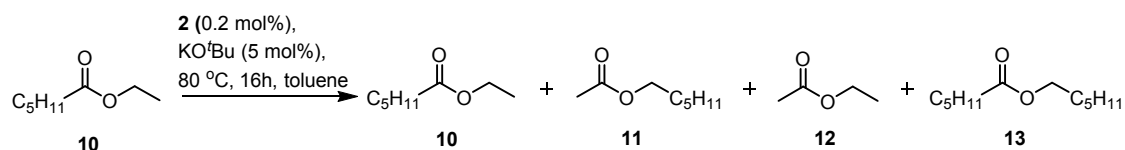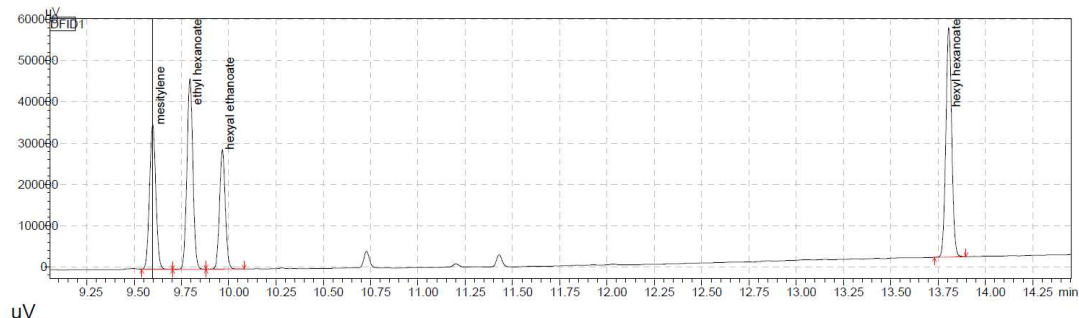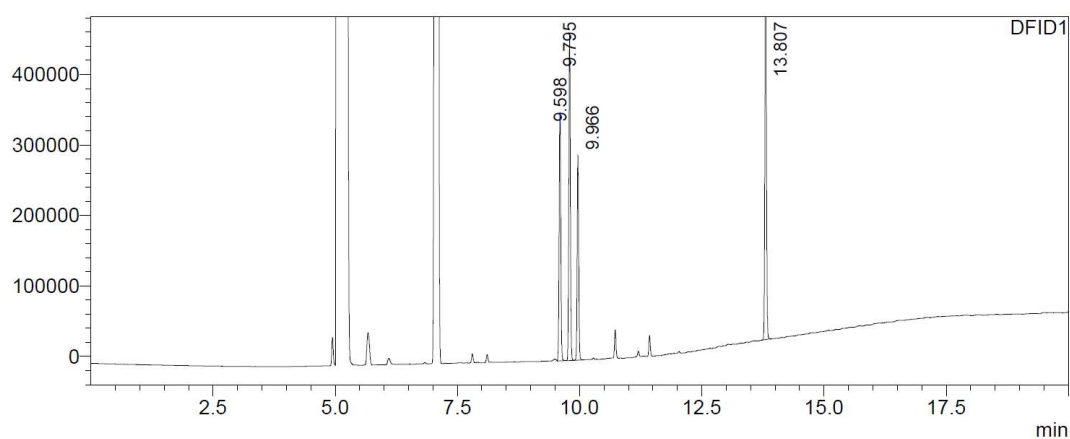

#### <Peak Table>

| Peak# | Ret. Time | Area    | Height  | Conc.  | Unit | Mark | Name            |
|-------|-----------|---------|---------|--------|------|------|-----------------|
| 1     | 9.598     | 815644  | 350076  | 22.411 | ppm  | V    | mesitylene      |
| 2     | 9.795     | 1007874 | 458590  | 27.692 | ppm  | V    | ethyl hexanoate |
| 3     | 9.966     | 618364  | 288910  | 16.990 | ppm  | V    | hexyl ethanoate |
| 4     | 13.807    | 1197654 | 552137  | 32.907 | ppm  | M    | hexyl hexanoate |
| Total |           | 3639536 | 1649713 |        |      |      |                 |

% efficiency of metathesis calculated based on the difference between two esters **11** and **10** with respect to internal standard and conversion factor.

**Figure S28.** GC chromatograph (Table-1, entry-3)



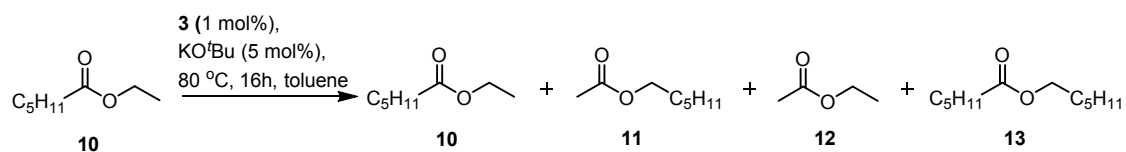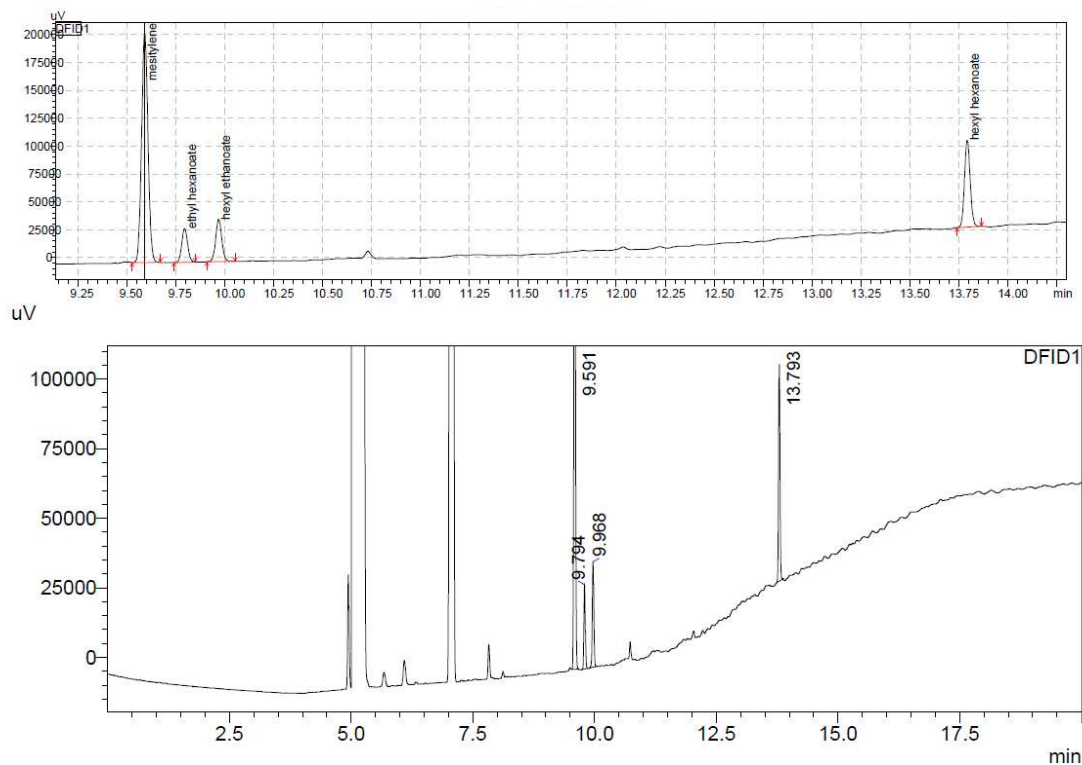

#### <Peak Table>

DFID1

| Peak# | Ret. Time | Area   | Height | Conc.  | Unit | Mark | Name            |
|-------|-----------|--------|--------|--------|------|------|-----------------|
| 1     | 9.591     | 468706 | 202787 | 60.696 | ppm  | M    | mesitylene      |
| 2     | 9.794     | 63210  | 30151  | 8.186  | ppm  | M    | ethyl hexanoate |
| 3     | 9.968     | 82535  | 37458  | 10.688 | ppm  | M    | hexyl ethanoate |
| 4     | 13.793    | 157771 | 77333  | 20.431 | ppm  | M    | hexyl hexanoate |
| Total |           | 772222 | 347729 |        |      |      |                 |

As **11** is  $\geq$  than starting material **10**, % efficiency is quantitative

**Figure S29.** GC chromatograph (Table-1, entry-4)

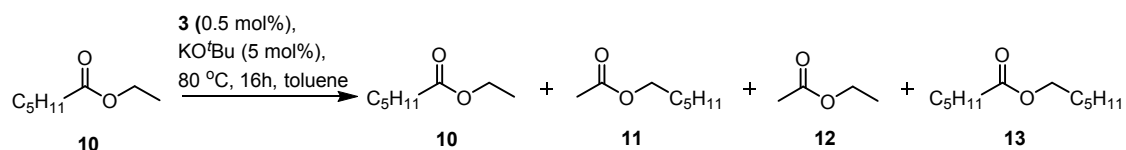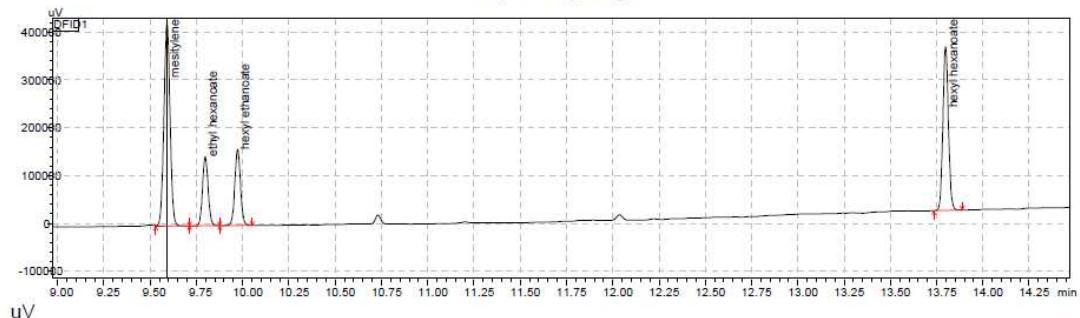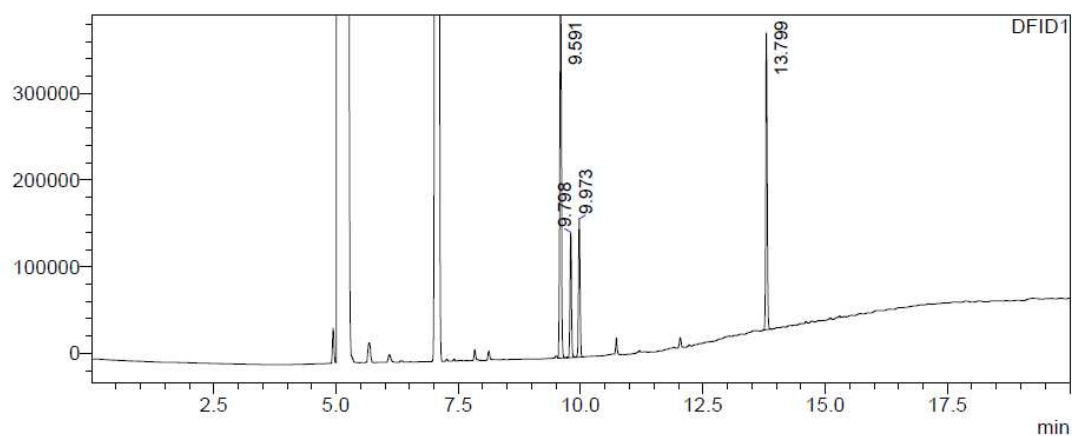

#### <Peak Table>

DFID1

| Peak# | Ret. Time | Area    | Height  | Conc.  | Unit | Mark | Name            |
|-------|-----------|---------|---------|--------|------|------|-----------------|
| 1     | 9.591     | 971768  | 416046  | 41.753 | ppm  | V    | mesitylene      |
| 2     | 9.798     | 304817  | 143410  | 13.097 | ppm  | V    | ethyl hexanoate |
| 3     | 9.973     | 342974  | 158467  | 14.736 | ppm  | V    | hexyl ethanoate |
| 4     | 13.799    | 707855  | 339842  | 30.414 | ppm  | M    | hexyl hexanoate |
| Total |           | 2327415 | 1057765 |        |      |      |                 |

As **11** is  $\geq$  than starting material **10**, % efficiency is quantitative

**Figure S30.** GC chromatograph (Table-1, entry-5)

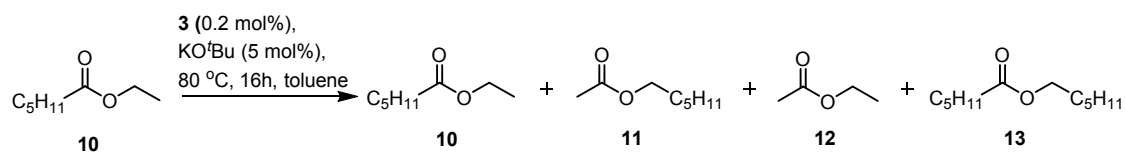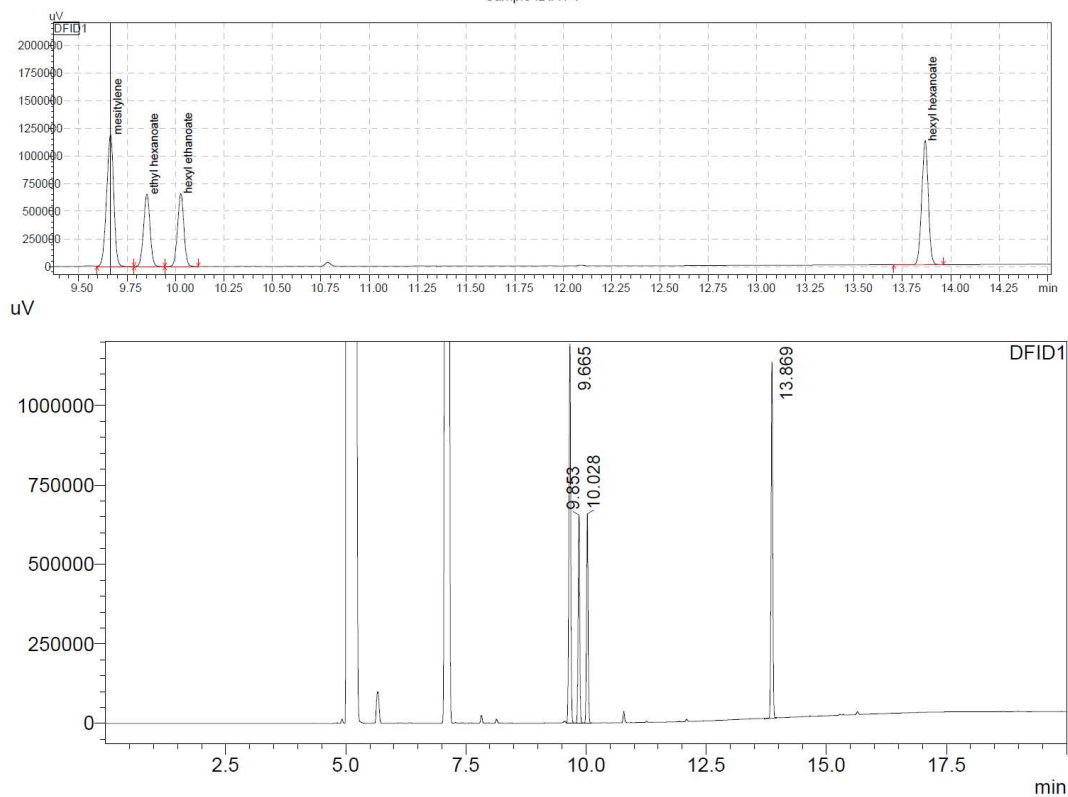

<Peak Table>

| Peak# | Ret. Time | Area    | Height  | Conc.  | Unit | Mark | Name            |
|-------|-----------|---------|---------|--------|------|------|-----------------|
| 1     | 9.665     | 3037546 | 1181817 | 34.998 | ppm  | V    | mesitylene      |
| 2     | 9.853     | 1511539 | 650098  | 17.416 | ppm  |      | ethyl hexanoate |
| 3     | 10.028    | 1486378 | 653908  | 17.126 | ppm  | V    | hexyl ethanoate |
| 4     | 13.869    | 2643616 | 1115234 | 30.460 | ppm  | V    | hexyl hexanoate |
| Total |           | 8679079 | 3601057 |        |      |      |                 |

% efficiency of metathesis calculated based on the difference between two esters **11** and **10** with respect to internal standard and conversion factor.

**Figure S31.** GC chromatograph (Table-1, entry-6)

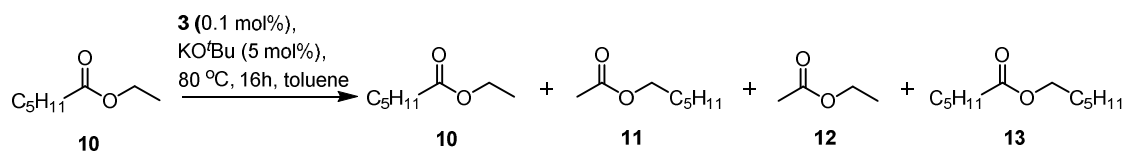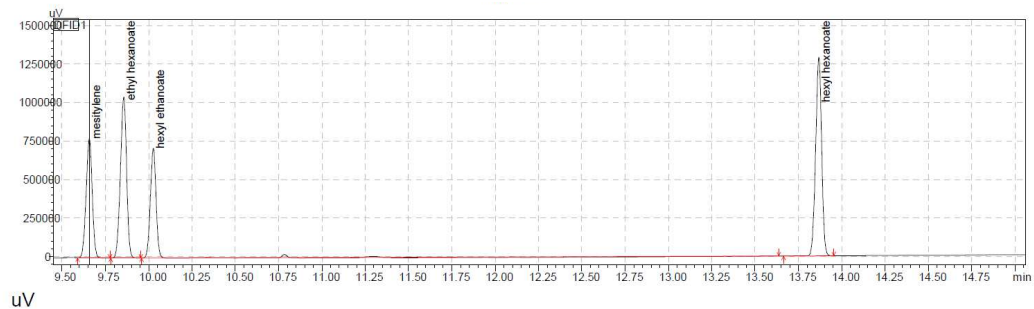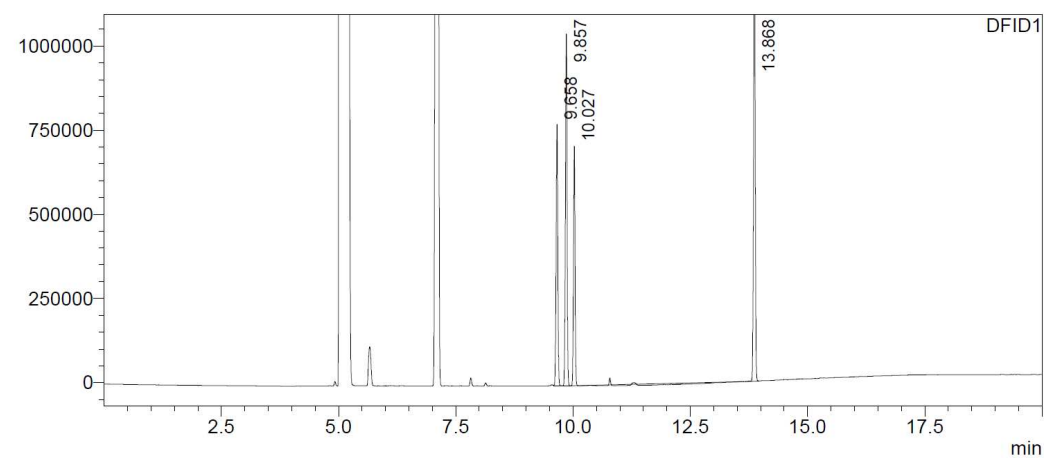

#### <Peak Table>

| Peak# | Ret. Time | Area    | Height  | Conc.  | Unit | Mark | Name            |
|-------|-----------|---------|---------|--------|------|------|-----------------|
| 1     | 9.658     | 1915128 | 772227  | 22.068 | ppm  | V    | mesitylene      |
| 2     | 9.857     | 2577437 | 1031657 | 29.700 | ppm  |      | ethyl hexanoate |
| 3     | 10.027    | 1058053 | 707888  | 12.192 | ppm  | S    | hexyl ethanoate |
| 4     | 13.868    | 3127592 | 1284281 | 36.040 | ppm  |      | hexyl hexanoate |
| Total |           | 8678210 | 3796053 |        |      |      |                 |

% efficiency of metathesis calculated based on the difference between two esters **11** and **10** with respect to internal standard and conversion factor.

**Figure S32.** GC chromatograph (Table-1, entry-7)

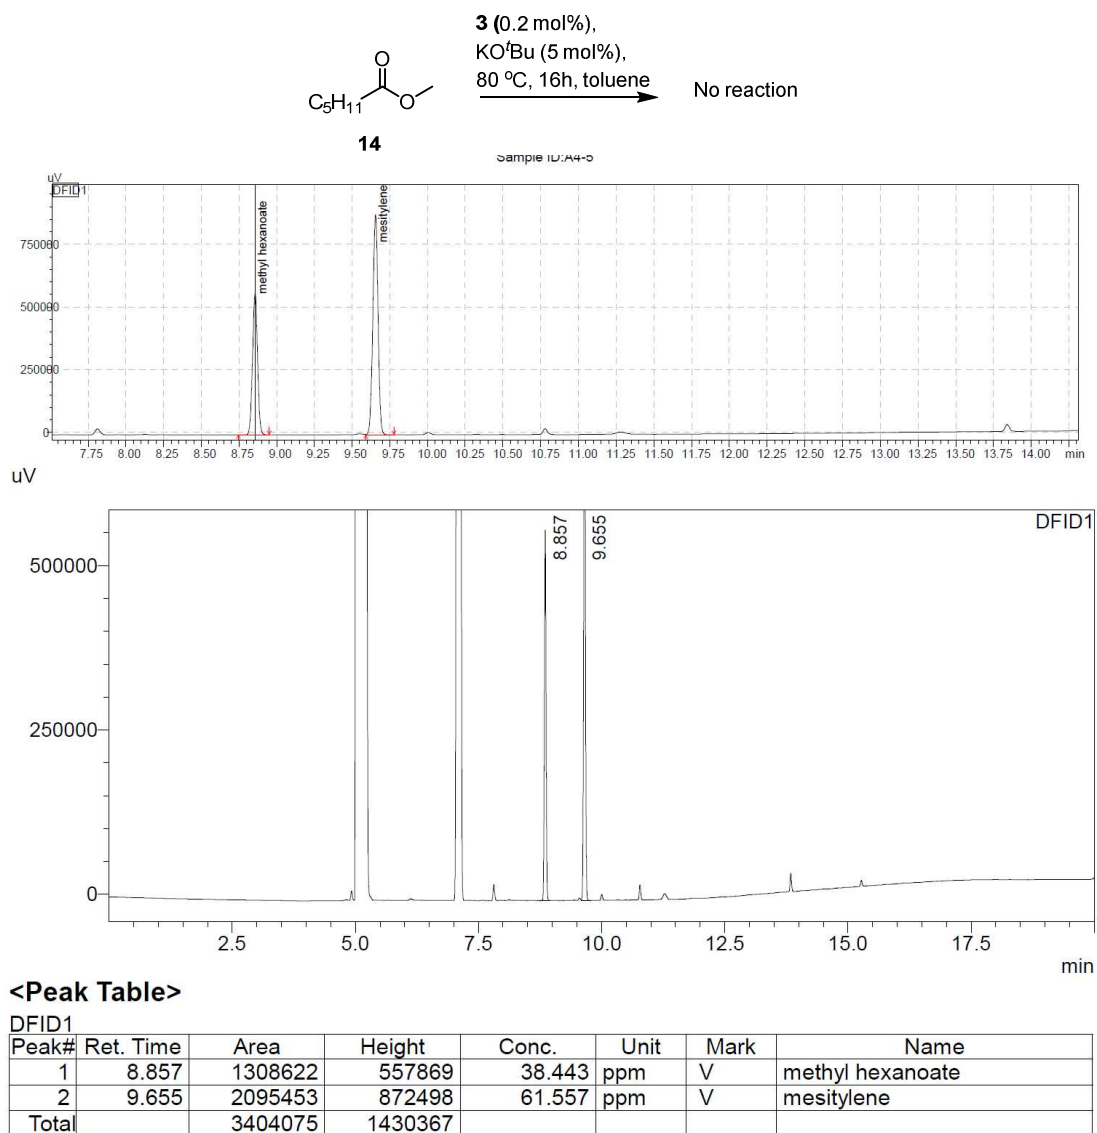

**Figure S33.** GC chromatograph (Table-2, Entry-1)

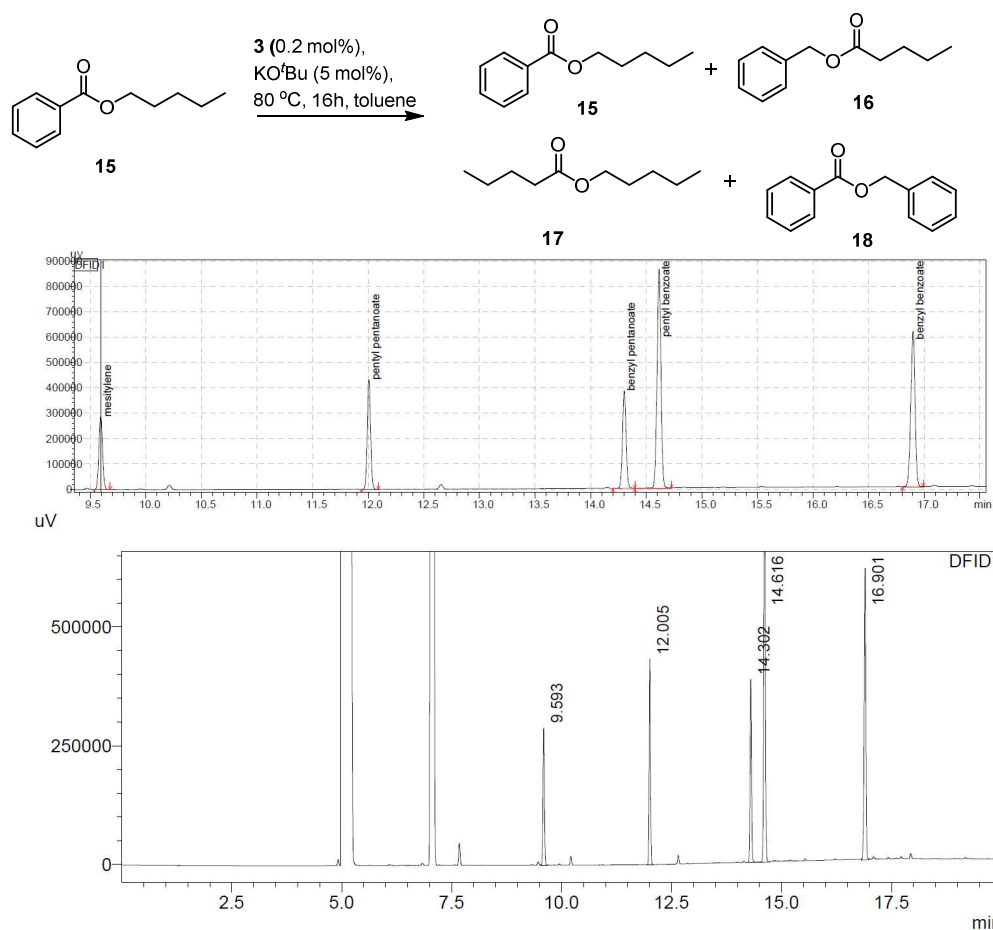

<Peak Table>

| Peak# | Ret. Time | Area    | Height  | Conc.  | Unit | Mark | Name              |
|-------|-----------|---------|---------|--------|------|------|-------------------|
| 1     | 9.593     | 670681  | 288175  | 10.800 | ppm  | V    | mesitylene        |
| 2     | 12.005    | 911694  | 429928  | 14.681 | ppm  | V    | pentyl pentanoate |
| 3     | 14.302    | 867900  | 383100  | 13.976 | ppm  | V    | benzyl pentanoate |
| 4     | 14.616    | 2109713 | 857436  | 33.974 | ppm  | V    | pentyl benzoate   |
| 5     | 16.901    | 1649879 | 612403  | 26.569 | ppm  | V    | benzyl benzoate   |
| Total |           | 6209867 | 2571042 |        |      |      |                   |

Metathesis efficiency is 99% due to benzyl benzoate being ~26% (should be 25). Pentyl benzoate **15**, the starting material, is more stable than benzyl pentanoate **16**, so efficiency cannot be measured from taking the difference of the two mixed aryl/alkyl esters.

**Figure S34.** GC chromatograph (Table-2, Entry-3)

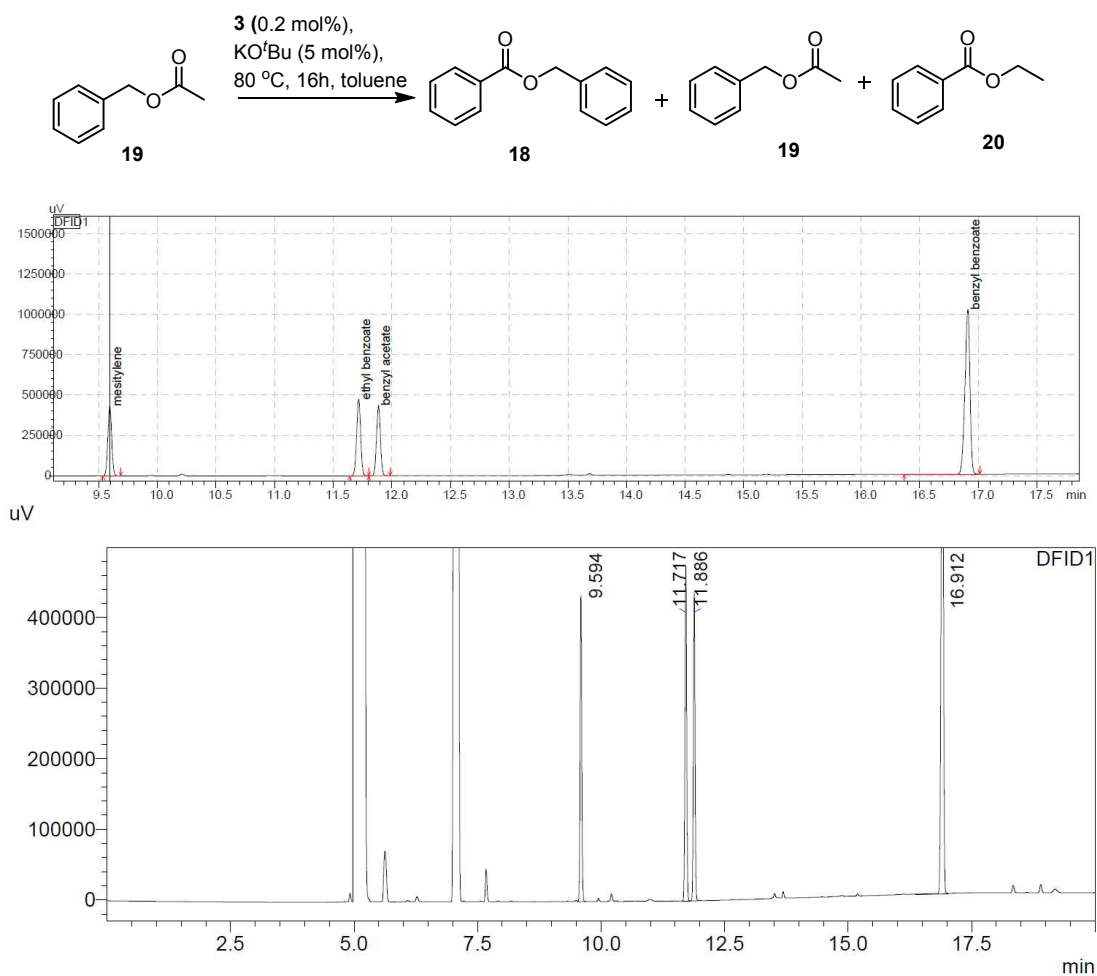

<Peak Table>

| Peak# | Ret. Time | Area    | Height  | Conc.  | Unit | Mark | Name            |
|-------|-----------|---------|---------|--------|------|------|-----------------|
| 1     | 9.594     | 1000568 | 432433  | 16.124 | ppm  | V    | mesitylene      |
| 2     | 11.717    | 1133712 | 472329  | 18.269 | ppm  |      | ethyl benzoate  |
| 3     | 11.886    | 1007358 | 434539  | 16.233 | ppm  | V    | benzyl acetate  |
| 4     | 16.912    | 3063891 | 1015804 | 49.374 | ppm  | V    | benzyl benzoate |
| Total |           | 6205529 | 2355105 |        |      |      |                 |

As **20** is  $\geq$  than starting material **19**, % efficiency is quantitative

**Figure S35.** GC chromatograph (Table-2, Entry-4)

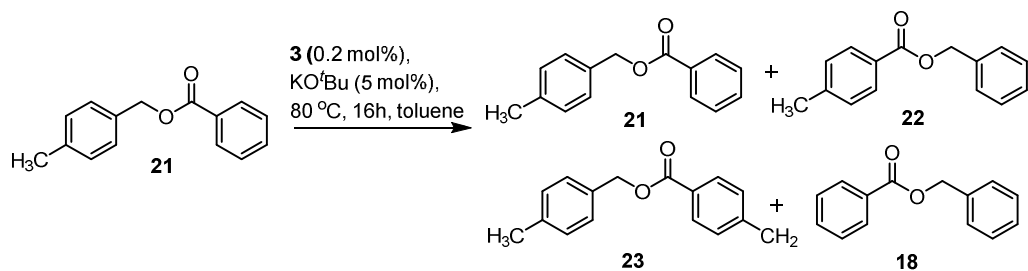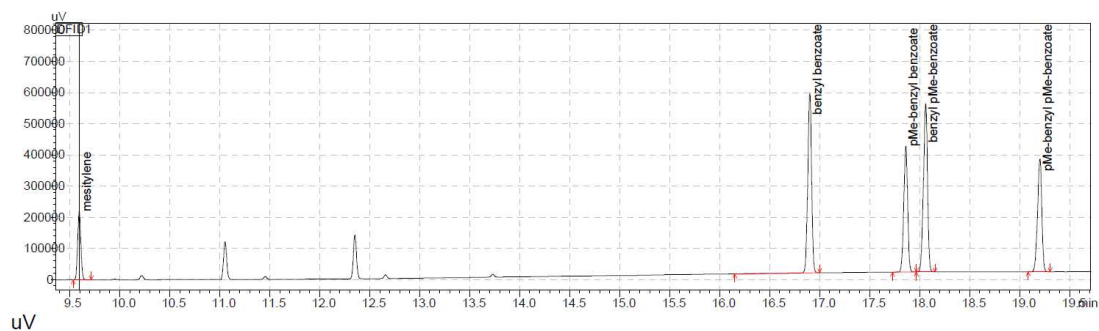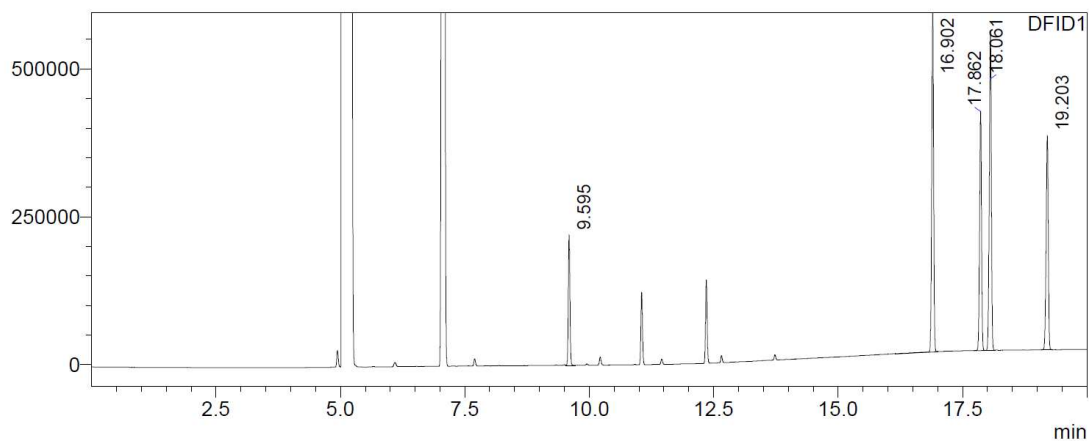

#### <Peak Table>

| Peak# | Ret. Time | Area    | Height  | Conc.  | Unit | Mark | Name                    |
|-------|-----------|---------|---------|--------|------|------|-------------------------|
| 1     | 9.595     | 499020  | 216941  | 8.704  | ppm  | V    | mesitylene              |
| 2     | 16.902    | 1545912 | 574222  | 26.965 | ppm  | V    | benzyl benzoate         |
| 3     | 17.862    | 1083863 | 402990  | 18.906 | ppm  |      | pMe-benzyl benzoate     |
| 4     | 18.061    | 1534721 | 536141  | 26.770 | ppm  | V    | benzyl pMe-benzoate     |
| 5     | 19.203    | 1069478 | 359187  | 18.655 | ppm  |      | pMe-benzyl pMe-benzoate |
| Total |           | 5732995 | 2089481 |        |      |      |                         |

As **22** is  $\geq$  than starting material **21**, % efficiency is quantitative

**Figure S36.** GC chromatograph (Table-2, Entry-5)



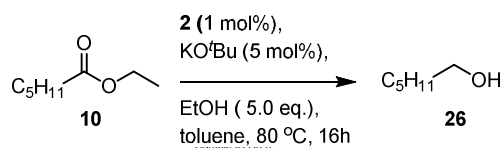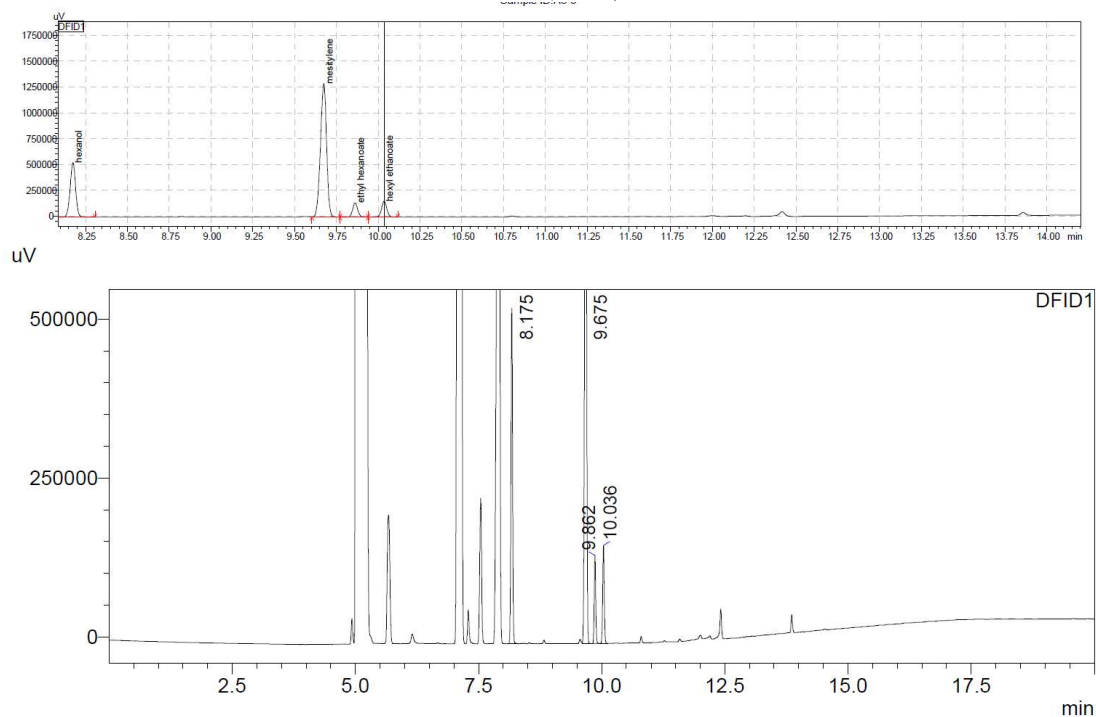

<Peak Table>

| Peak# | Ret. Time | Area    | Height  | Conc.  | Unit | Mark | Name            |
|-------|-----------|---------|---------|--------|------|------|-----------------|
| 1     | 8.175     | 1204771 | 525389  | 23.520 | ppm  |      | hexanol         |
| 2     | 9.675     | 3287751 | 1279433 | 64.184 | ppm  | V    | mesitylene      |
| 3     | 9.862     | 290504  | 136971  | 5.671  | ppm  |      | ethyl hexanoate |
| 4     | 10.036    | 339392  | 153253  | 6.626  | ppm  | V    | hexyl ethanoate |
| Total |           | 5122419 | 2095045 |        |      |      |                 |

Conversion factor for hexanol **26** with respect to mesitylene is 0.65

**Figure S37.** GC chromatograph (Table-3, Entry-1)

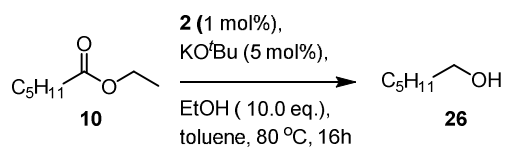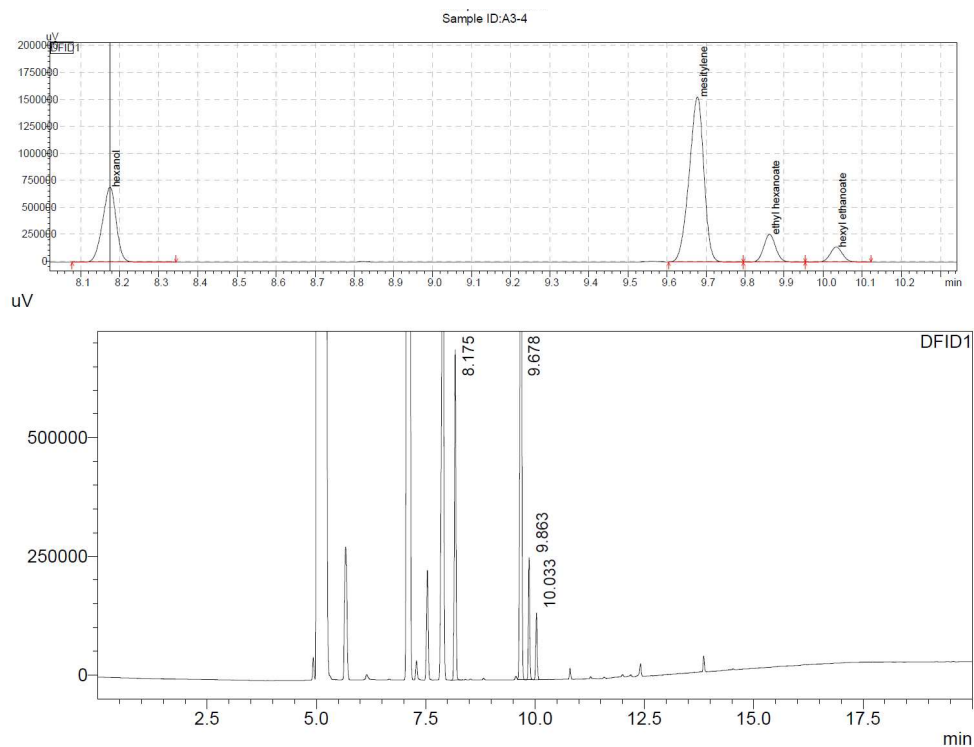

<Peak Table>

| Peak# | Ret. Time | Area    | Height  | Conc.  | Unit | Mark | Name            |
|-------|-----------|---------|---------|--------|------|------|-----------------|
| 1     | 8.175     | 1689331 | 692498  | 25.731 | ppm  | M    | hexanol         |
| 2     | 9.678     | 4016219 | 1523652 | 61.174 | ppm  | V    | mesitylene      |
| 3     | 9.863     | 548282  | 256030  | 8.351  | ppm  |      | ethyl hexanoate |
| 4     | 10.033    | 311419  | 138738  | 4.743  | ppm  | V    | hexyl ethanoate |
| Total |           | 6565251 | 2610918 |        |      |      |                 |

Figure S38. GC chromatograph (Table-3, Entry-2)

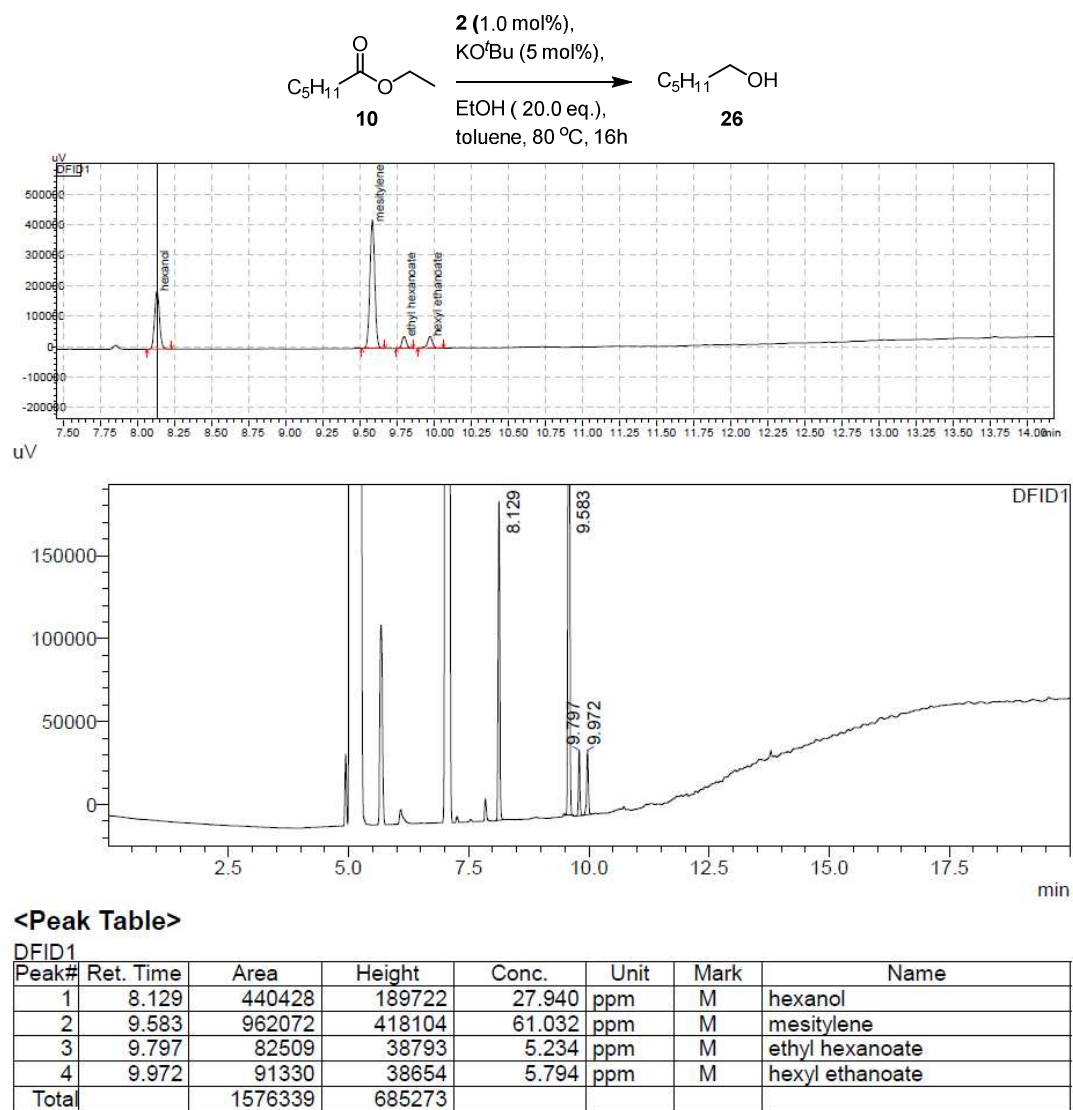

**Figure S39.** GC chromatograph (Table-3, Entry-3)

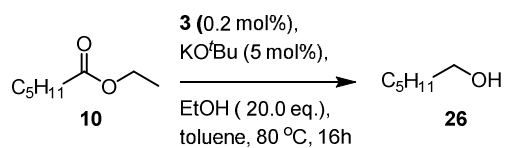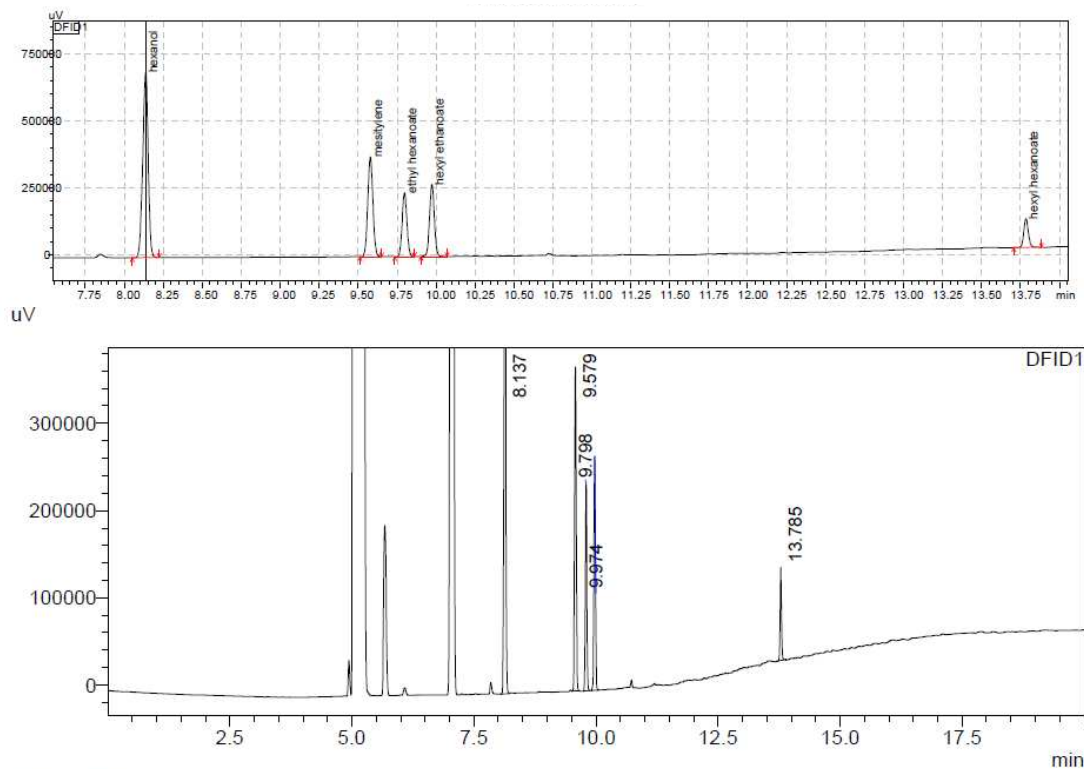

**<Peak Table>**

| Peak# | Ret. Time | Area    | Height  | Conc.  | Unit | Mark | Name            |
|-------|-----------|---------|---------|--------|------|------|-----------------|
| 1     | 8.137     | 1671871 | 687199  | 43.613 | ppm  |      | hexanol         |
| 2     | 9.579     | 859456  | 370054  | 22.420 | ppm  | M    | mesitylene      |
| 3     | 9.798     | 506374  | 236697  | 13.209 | ppm  | M    | ethyl hexanoate |
| 4     | 9.974     | 576599  | 263554  | 15.041 | ppm  | M    | hexyl ethanoate |
| 5     | 13.785    | 219130  | 106149  | 5.716  | ppm  | M    | hexyl hexanoate |
| Total |           | 3833429 | 1663654 |        |      |      |                 |

**Figure S40.** GC chromatograph (Table-3, Entry-4)

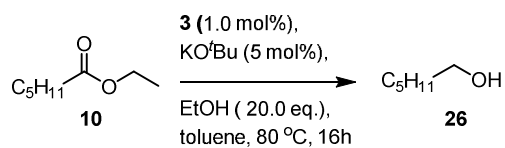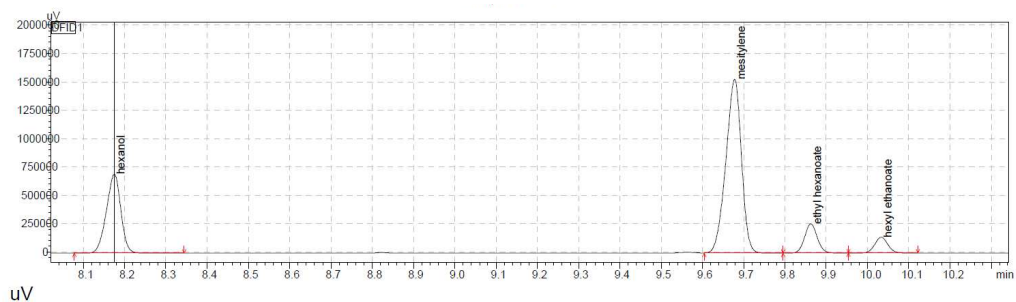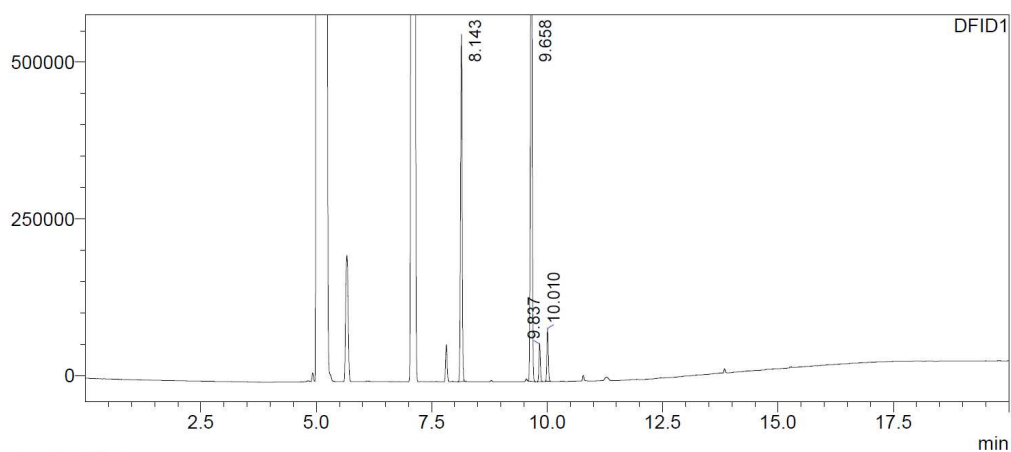

#### <Peak Table>

DFID1

| Peak# | Ret. Time | Area    | Height  | Conc.  | Unit | Mark | Name            |
|-------|-----------|---------|---------|--------|------|------|-----------------|
| 1     | 8.143     | 1324306 | 547305  | 33.708 | ppm  | M    | hexanol         |
| 2     | 9.658     | 2298225 | 949926  | 58.498 | ppm  |      | mesitylene      |
| 3     | 9.837     | 127602  | 59275   | 3.248  | ppm  | M    | ethyl hexanoate |
| 4     | 10.010    | 178588  | 83234   | 4.546  | ppm  | M    | hexyl ethanoate |
| Total |           | 3928720 | 1639740 |        |      |      |                 |

**Figure S41.** GC chromatograph (Table-3, Entry-5)

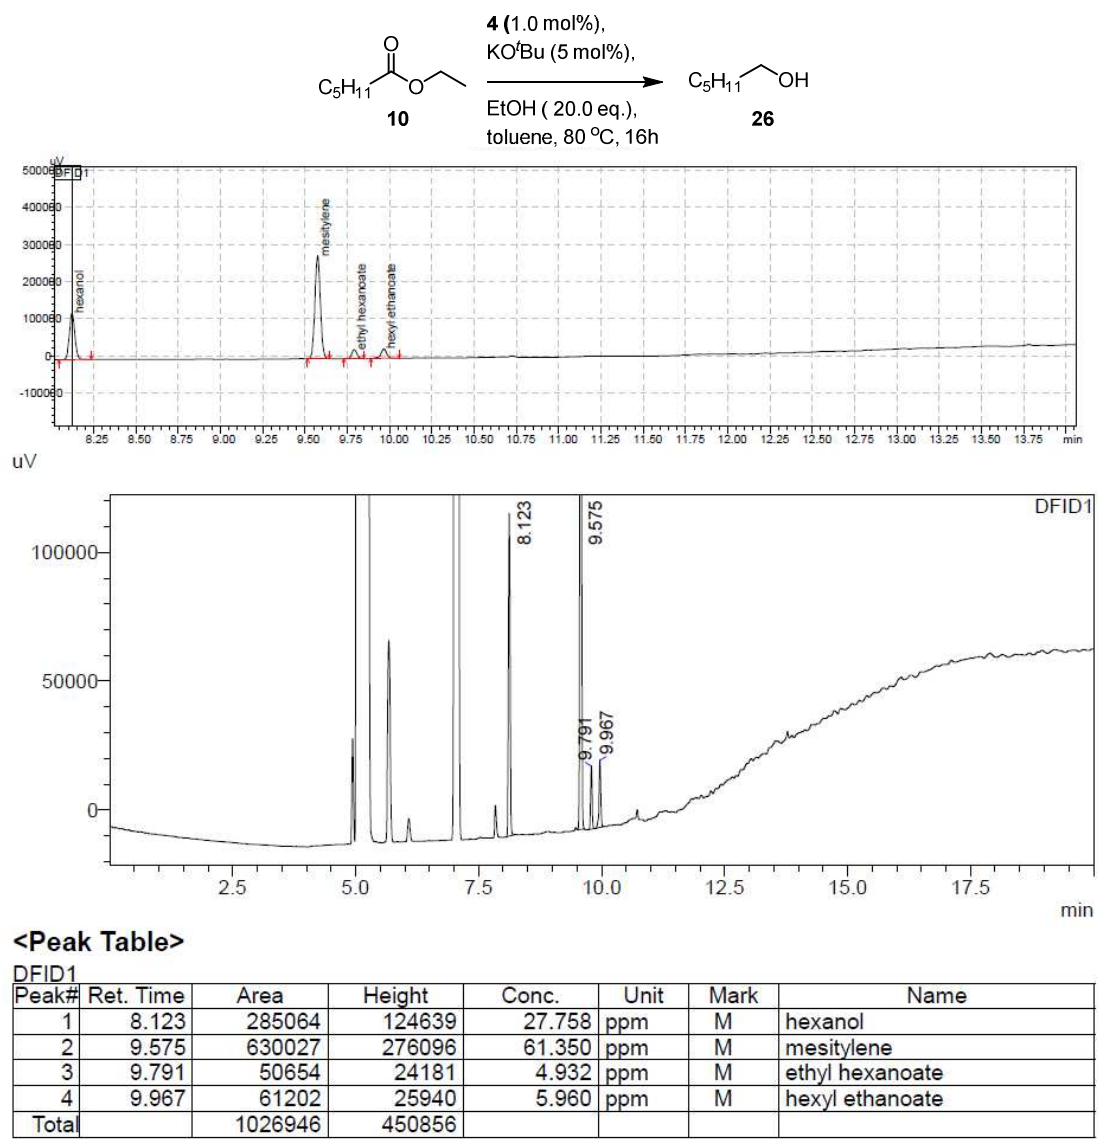

**Figure S42.** GC chromatograph (Table-3, Entry-6)

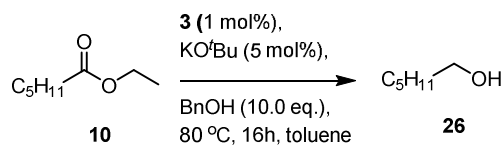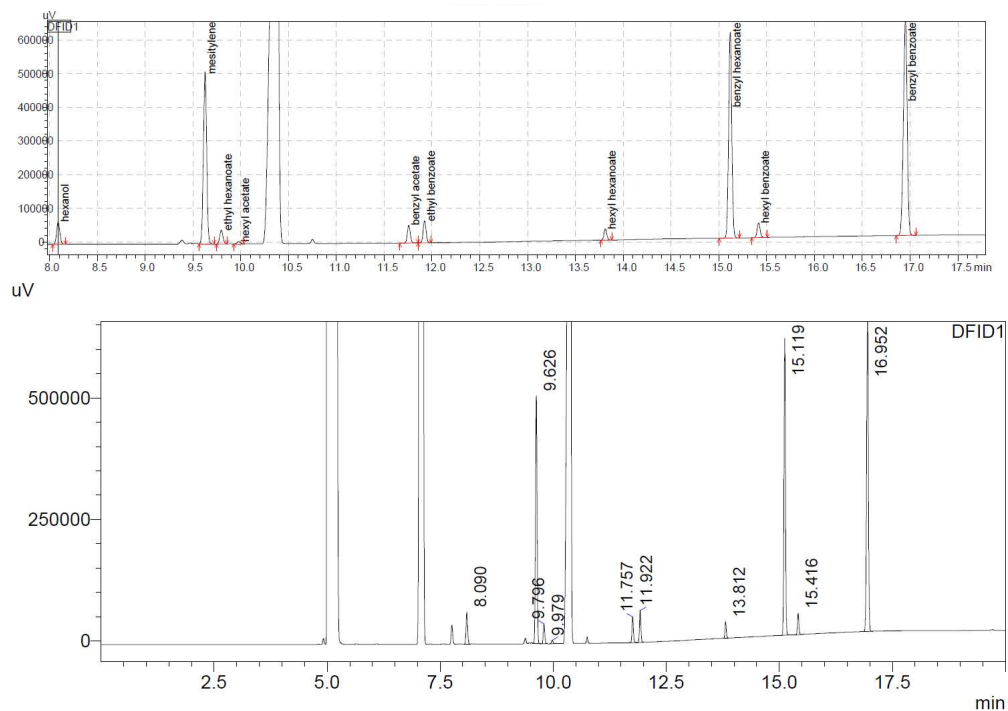

<Peak Table>

| Peak# | Ret. Time | Area    | Height  | Conc.  | Unit | Mark | Name             |
|-------|-----------|---------|---------|--------|------|------|------------------|
| 1     | 8.090     | 156236  | 65514   | 3.083  | ppm  |      | hexanol          |
| 2     | 9.626     | 1214299 | 509089  | 23.960 | ppm  | V    | mesitylene       |
| 3     | 9.796     | 93701   | 40184   | 1.849  | ppm  | M    | ethyl hexanoate  |
| 4     | 9.979     | 16946   | 6870    | 0.334  | ppm  | M    | hexyl acetate    |
| 5     | 11.757    | 116291  | 52502   | 2.295  | ppm  |      | benzyl acetate   |
| 6     | 11.922    | 143197  | 65437   | 2.826  | ppm  | V    | ethyl benzoate   |
| 7     | 13.812    | 67327   | 33055   | 1.328  | ppm  | M    | hexyl hexanoate  |
| 8     | 15.119    | 1408140 | 607414  | 27.785 | ppm  |      | benzyl hexanoate |
| 9     | 15.416    | 94317   | 43209   | 1.861  | ppm  | M    | hexyl benzoate   |
| 10    | 16.952    | 1757551 | 644027  | 34.679 | ppm  | M    | benzyl benzoate  |
| Total |           | 5068005 | 2067302 |        |      |      |                  |

Figure S43. GC chromatograph (Table-3, Entry-7)

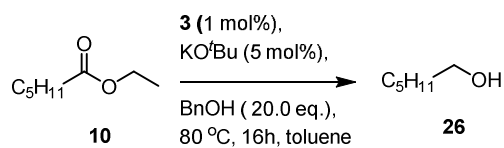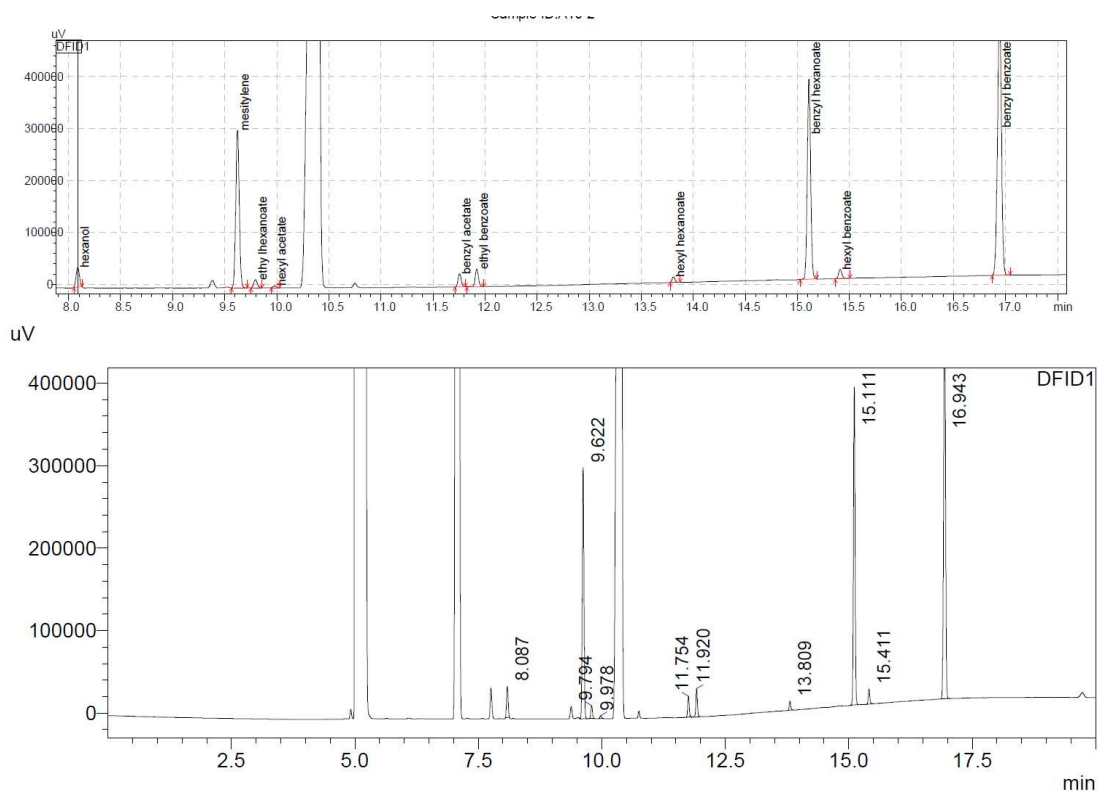

**<Peak Table>**

| Peak# | Ret. Time | Area    | Height  | Conc.  | Unit | Mark | Name             |
|-------|-----------|---------|---------|--------|------|------|------------------|
| 1     | 8.087     | 84084   | 37214   | 2.590  | ppm  | M    | hexanol          |
| 2     | 9.622     | 714672  | 303320  | 22.014 | ppm  | V    | mesitylene       |
| 3     | 9.794     | 36958   | 15620   | 1.138  | ppm  | M    | ethyl hexanoate  |
| 4     | 9.978     | 7483    | 3245    | 0.230  | ppm  | M    | hexyl acetate    |
| 5     | 11.754    | 53359   | 25155   | 1.644  | ppm  | M    | benzyl acetate   |
| 6     | 11.920    | 75416   | 33818   | 2.323  | ppm  |      | ethyl benzoate   |
| 7     | 13.809    | 21661   | 10632   | 0.667  | ppm  | M    | hexyl hexanoate  |
| 8     | 15.111    | 869849  | 381046  | 26.794 | ppm  | M    | benzyl hexanoate |
| 9     | 15.411    | 39421   | 17832   | 1.214  | ppm  | M    | hexyl benzoate   |
| 10    | 16.943    | 1343473 | 510964  | 41.384 | ppm  | M    | benzyl benzoate  |
| Total |           | 3246376 | 1338846 |        |      |      |                  |

**Figure S44.** GC chromatograph (Table-3, Entry-8)



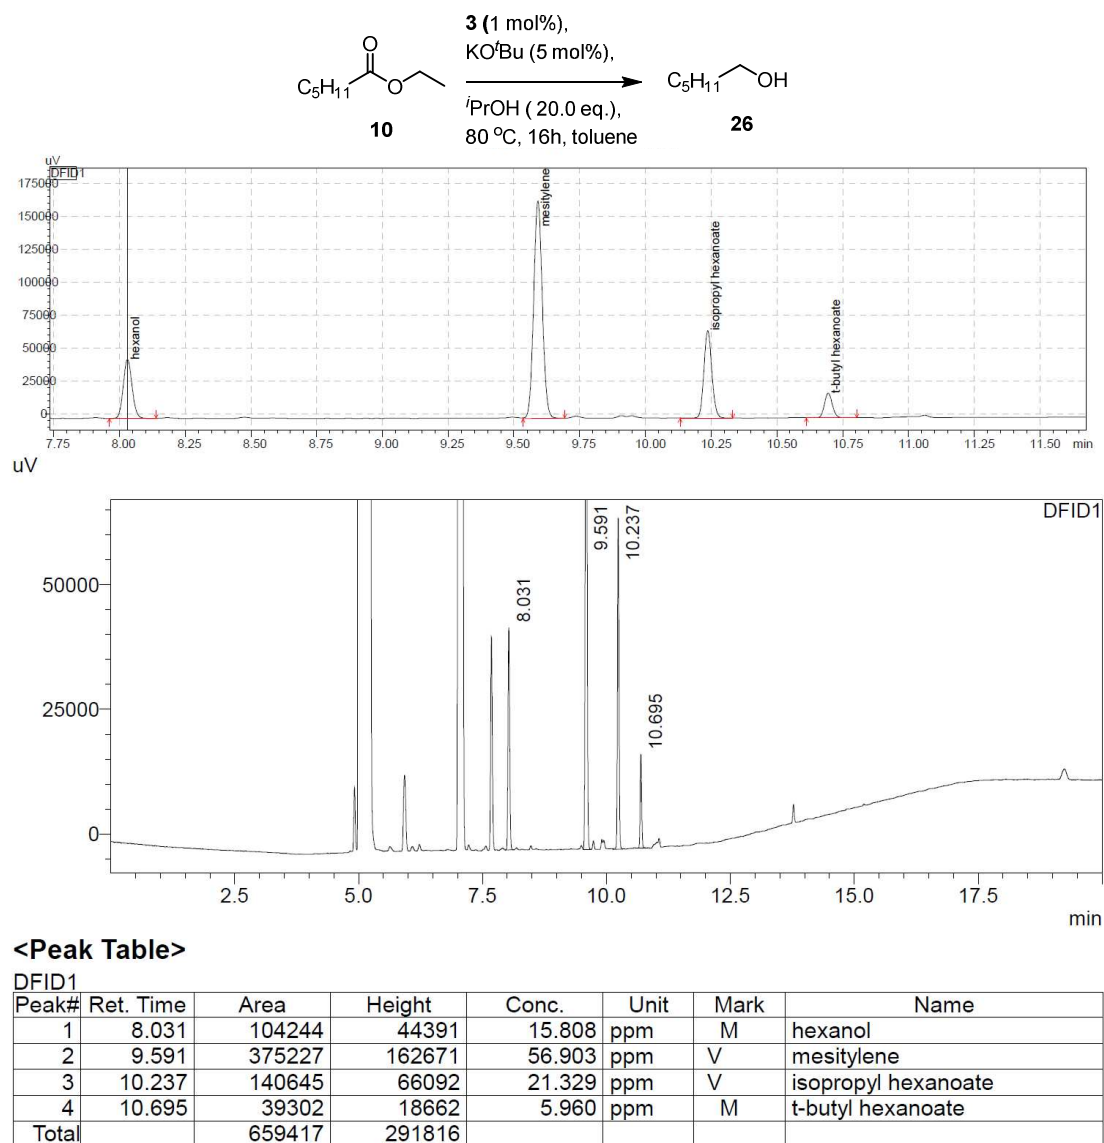

**Figure S45.** GC chromatograph (Table-3, Entry-9)

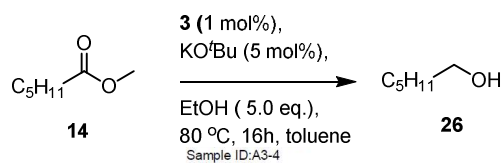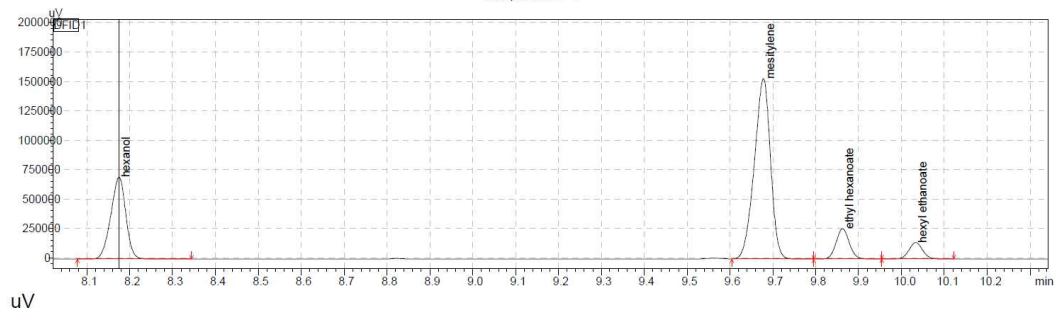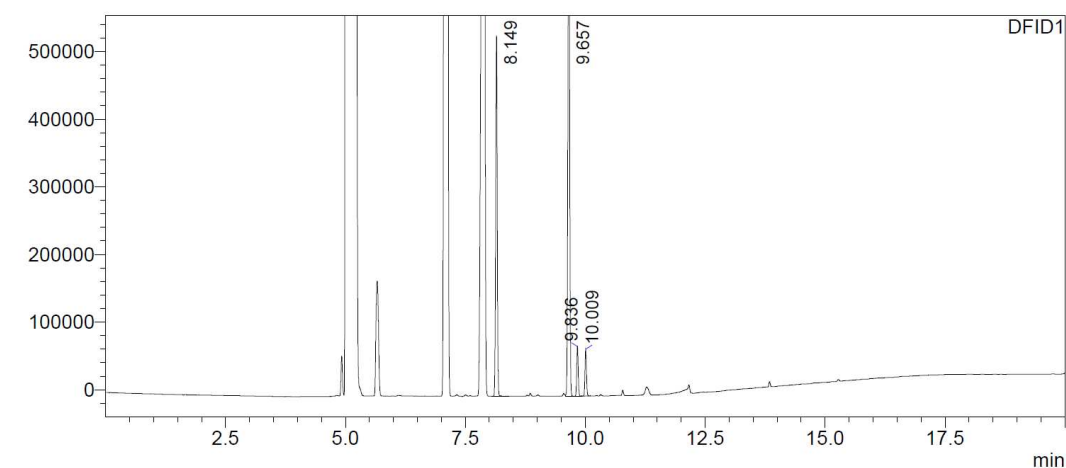

#### <Peak Table>

| Peak# | Ret. Time | Area    | Height  | Conc.  | Unit | Mark | Name            |
|-------|-----------|---------|---------|--------|------|------|-----------------|
| 1     | 8.149     | 1200587 | 526500  | 33.540 | ppm  | S    | hexanol         |
| 2     | 9.657     | 2072929 | 853797  | 57.909 | ppm  | V    | mesitylene      |
| 3     | 9.836     | 157848  | 73312   | 4.410  | ppm  |      | ethyl hexanoate |
| 4     | 10.009    | 148243  | 69163   | 4.141  | ppm  | V    | hexyl ethanoate |
| Total |           | 3579607 | 1522771 |        |      |      |                 |

Conversion factor for hexanol **26** was determined to be 0.65

**Figure S46.** GC chromatograph (Table-4, Entry-1)

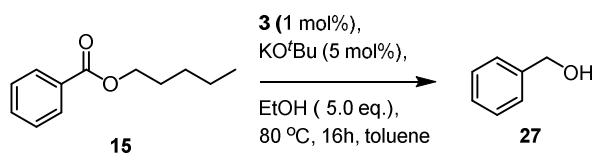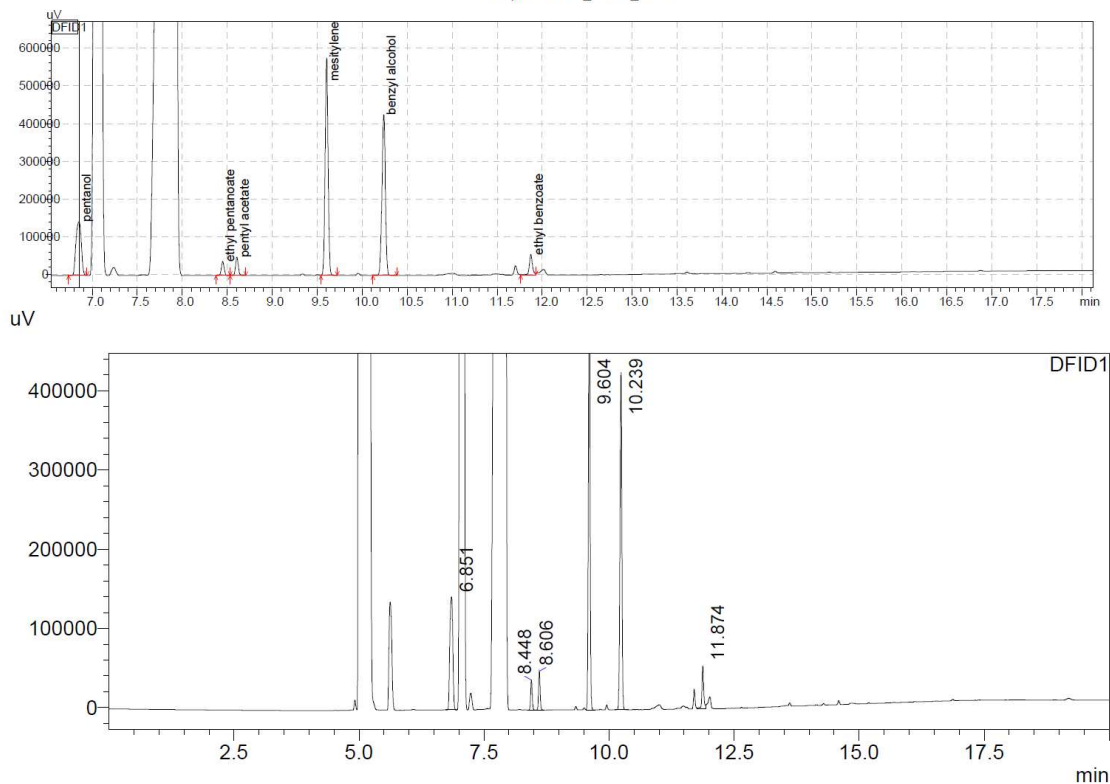

#### <Peak Table>

| Peak# | Ret. Time | Area    | Height  | Conc.  | Unit | Mark | Name             |
|-------|-----------|---------|---------|--------|------|------|------------------|
| 1     | 6.851     | 588624  | 142662  | 17.587 | ppm  | M    | pentanol         |
| 2     | 8.448     | 81367   | 37330   | 2.431  | ppm  | V    | ethyl pentanoate |
| 3     | 8.606     | 104350  | 48218   | 3.118  | ppm  | V    | pentyl acetate   |
| 4     | 9.604     | 1313541 | 570927  | 39.247 | ppm  | V    | mesitylene       |
| 5     | 10.239    | 1124616 | 421144  | 33.602 | ppm  | V    | benzyl alcohol   |
| 6     | 11.874    | 134374  | 54204   | 4.015  | ppm  | V    | ethyl benzoate   |
| Total |           | 3346871 | 1274485 |        |      |      |                  |

Conversion factor for benzyl alcohol **27** was determined to be 0.95

**Figure S47.** GC chromatograph (Table-4, Entry-2)

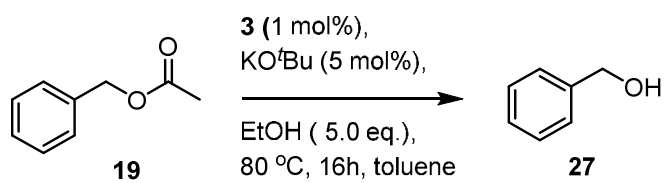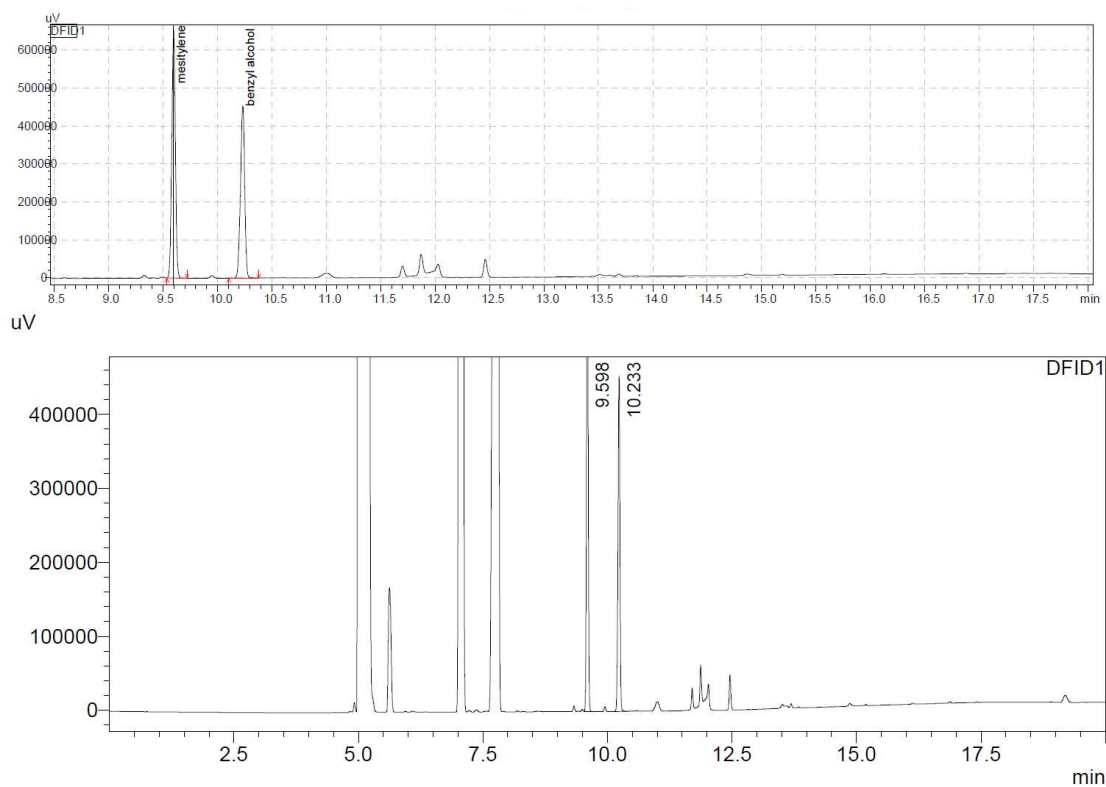

<Peak Table>

| DFID1 |           |         |         |        |      |      |                |
|-------|-----------|---------|---------|--------|------|------|----------------|
| Peak# | Ret. Time | Area    | Height  | Conc.  | Unit | Mark | Name           |
| 1     | 9.598     | 1525485 | 652745  | 55.634 | ppm  | V    | mesitylene     |
| 2     | 10.233    | 1216527 | 452003  | 44.366 | ppm  | V    | benzyl alcohol |
| Total |           | 2742012 | 1104748 |        |      |      |                |

**Figure S48.** GC chromatograph (Table-4, Entry-3)

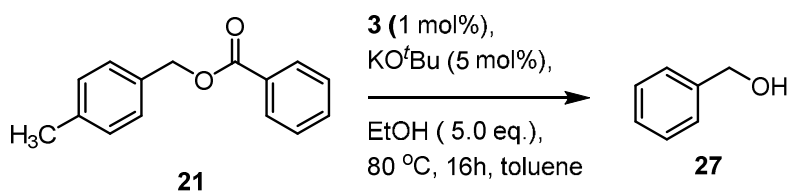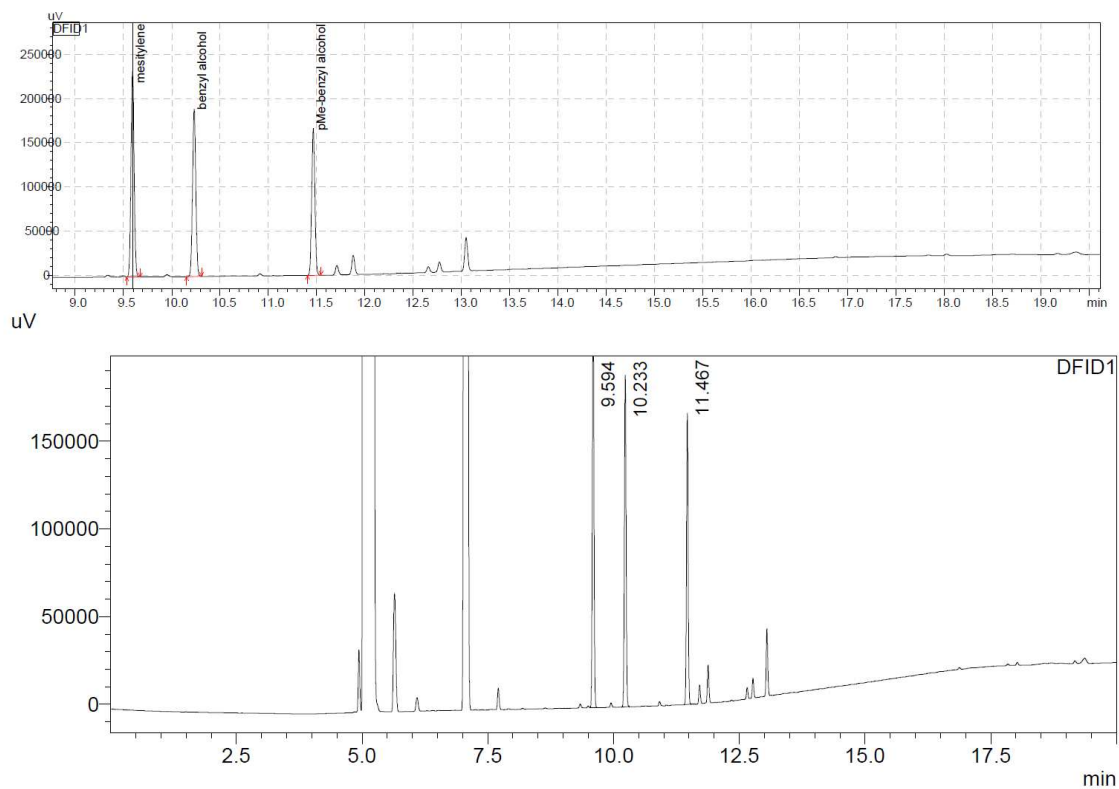

<Peak Table>

| Peak# | Ret. Time | Area    | Height | Conc.  | Unit | Mark | Name               |
|-------|-----------|---------|--------|--------|------|------|--------------------|
| 1     | 9.594     | 524887  | 231209 | 38.838 | ppm  | M    | mesitylene         |
| 2     | 10.233    | 445522  | 188601 | 32.966 | ppm  | M    | benzyl alcohol     |
| 3     | 11.467    | 381065  | 164034 | 28.196 | ppm  | M    | pMe-benzyl alcohol |
| Total |           | 1351473 | 583844 |        |      |      |                    |

Figure S49. GC chromatograph (Table-4, Entry-4)

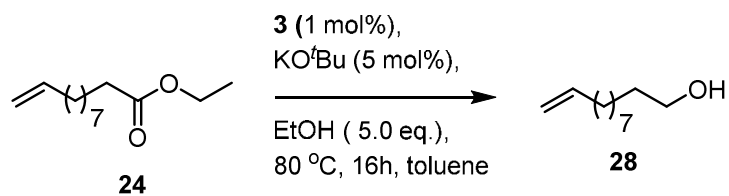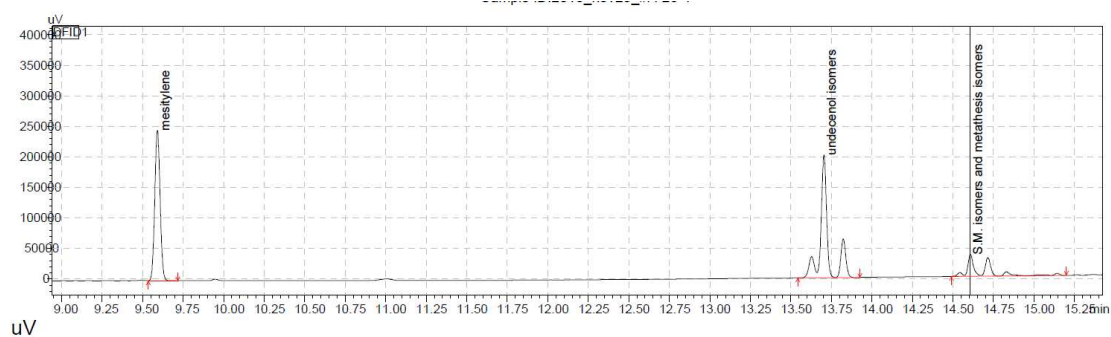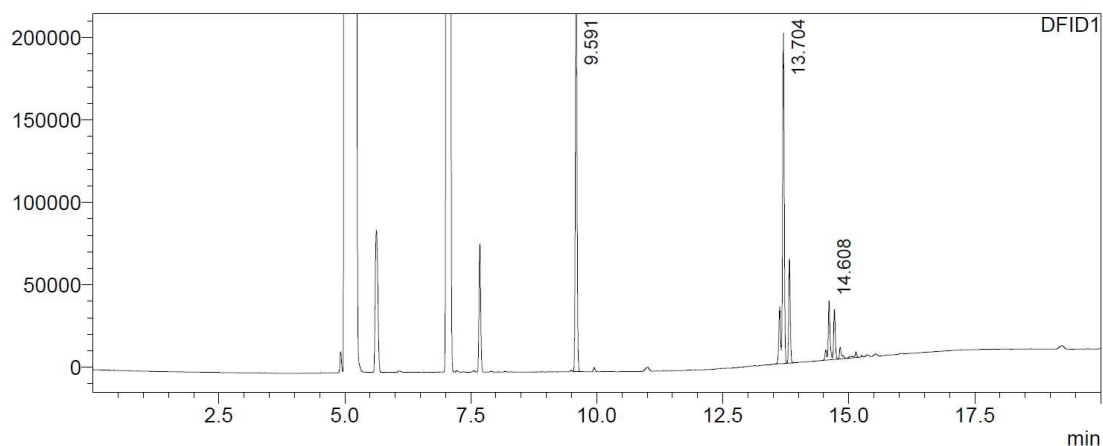

#### <Peak Table>

DFID1

| Peak# | Ret. Time | Area    | Height | Conc. | Unit | Mark | Name                           |
|-------|-----------|---------|--------|-------|------|------|--------------------------------|
| 1     | 9.591     | 561057  | 241769 | 0.000 | ppm  | V    | mesitylene                     |
| 2     | 13.704    | 659673  | 199898 | 0.000 | ppm  | M    | undecanol isomers              |
| 3     | 14.608    | 198019  | 35504  | 0.000 | ppm  | M    | S.M. isomers and metathesis is |
| Total |           | 1418749 | 477172 |       |      |      |                                |

Conversion factor used for undecanol was hexanol conversion factor multiplied by 2.

**Figure S50.** GC chromatograph (Table-4, Entry-5)

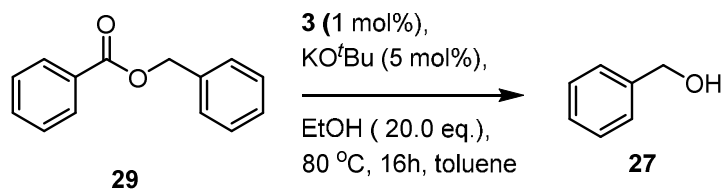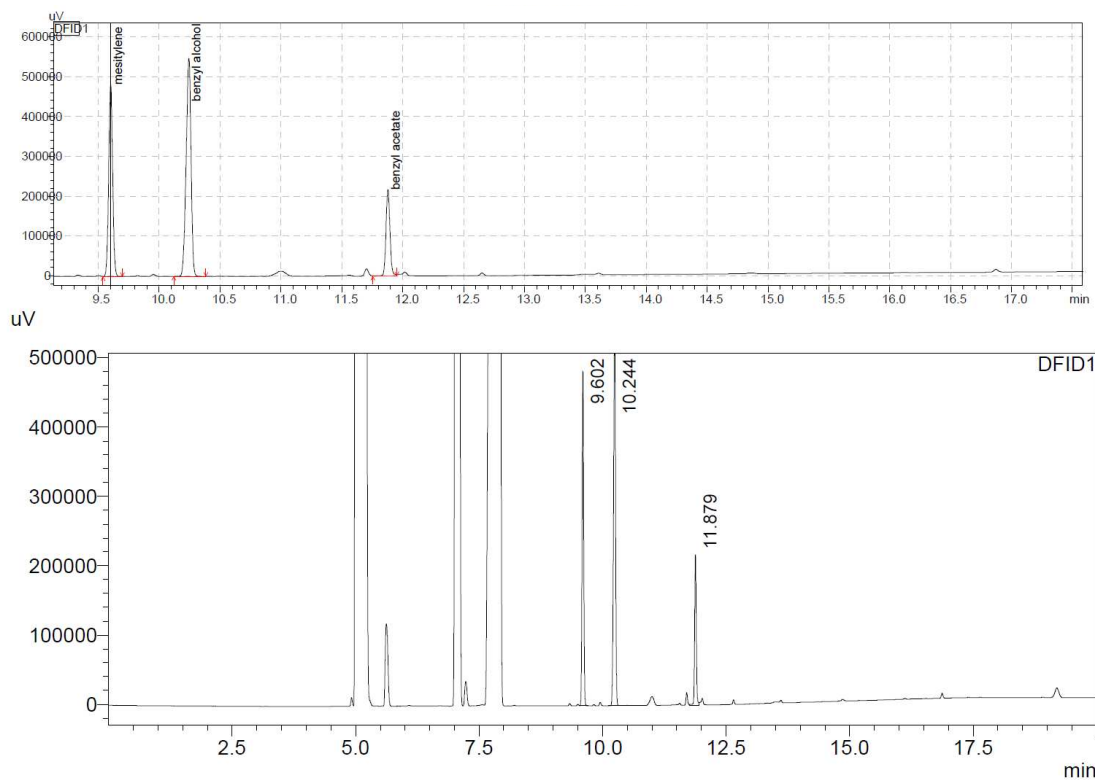

**<Peak Table>**

| Peak# | Ret. Time | Area    | Height  | Conc.  | Unit | Mark | Name           |
|-------|-----------|---------|---------|--------|------|------|----------------|
| 1     | 9.602     | 1086323 | 479862  | 34.890 | ppm  | V    | mesitylene     |
| 2     | 10.244    | 1530689 | 543752  | 49.162 | ppm  |      | benzyl alcohol |
| 3     | 11.879    | 496534  | 216292  | 15.948 | ppm  | V    | benzyl acetate |
| Total |           | 3113546 | 1239906 |        |      |      |                |

Conversion factor for benzyl alcohol was determined to be 0.95

**Figure S51.** GC chromatograph (Table-4, Entry-6)

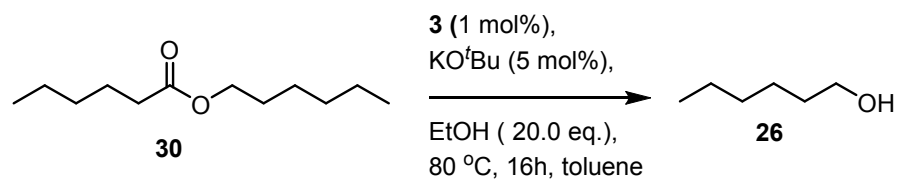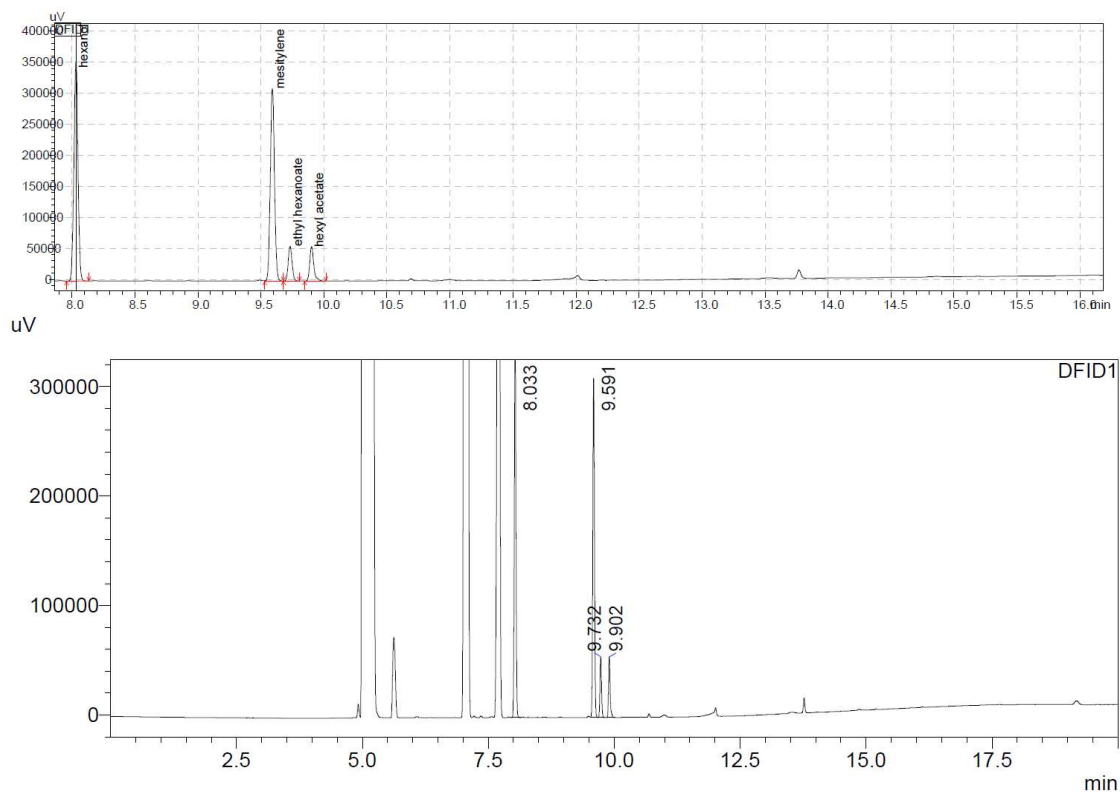

<Peak Table>

| Peak# | Ret. Time | Area    | Height | Conc.  | Unit | Mark | Name            |
|-------|-----------|---------|--------|--------|------|------|-----------------|
| 1     | 8.033     | 796835  | 350651 | 45.420 | ppm  | M    | hexanol         |
| 2     | 9.591     | 713831  | 305970 | 40.689 | ppm  | V    | mesitylene      |
| 3     | 9.732     | 119337  | 55059  | 6.802  | ppm  | V    | ethyl hexanoate |
| 4     | 9.902     | 124360  | 55013  | 7.089  | ppm  |      | hexyl acetate   |
| Total |           | 1754363 | 766694 |        |      |      |                 |

Figure S52. GC chromatograph (Table-4, Entry-7)



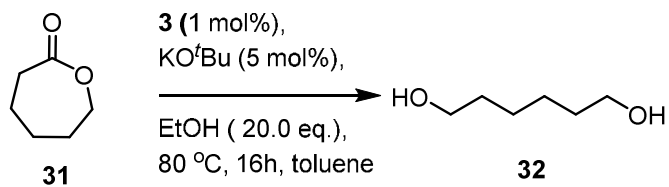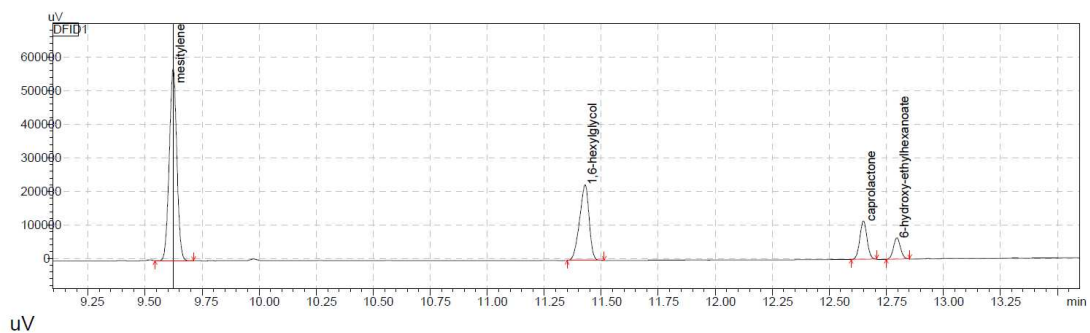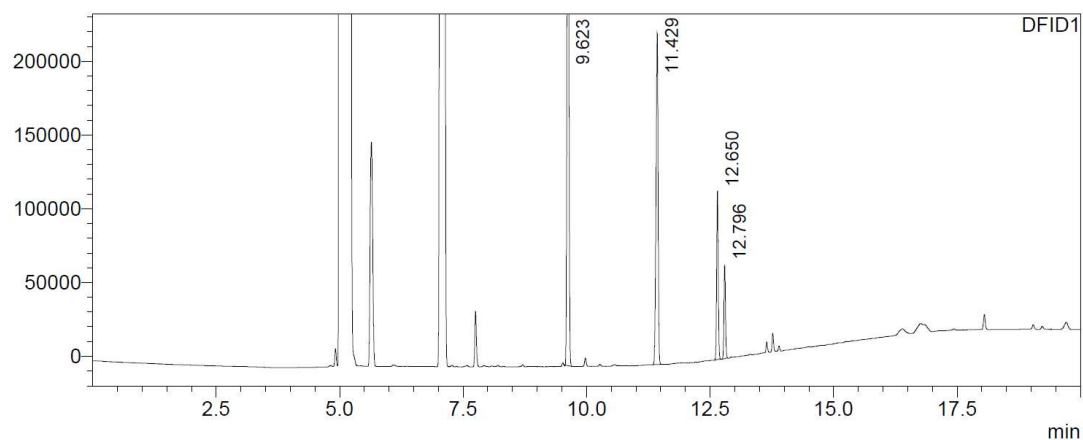

#### <Peak Table>

| Peak# | Ret. Time | Area    | Height | Conc.  | Unit | Mark | Name                     |
|-------|-----------|---------|--------|--------|------|------|--------------------------|
| 1     | 9.623     | 1319492 | 565944 | 55.987 | ppm  | M    | mesitylene               |
| 2     | 11.429    | 652136  | 223238 | 27.670 | ppm  | M    | 1,6-hexylglycol          |
| 3     | 12.650    | 250350  | 113473 | 10.622 | ppm  | M    | caprolactone             |
| 4     | 12.796    | 134817  | 62959  | 5.720  | ppm  | M    | 6-hydroxy-ethylhexanoate |
| Total |           | 2356795 | 965614 |        |      |      |                          |

Conversion factor for product diol **32** was determined to be 0.84.

**Figure S53.** GC chromatograph (Table-4, Entry-8)

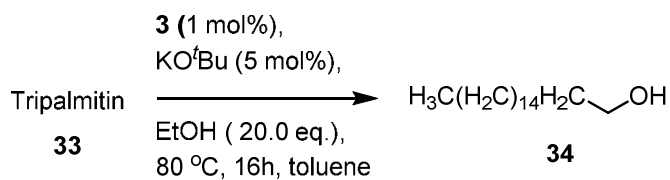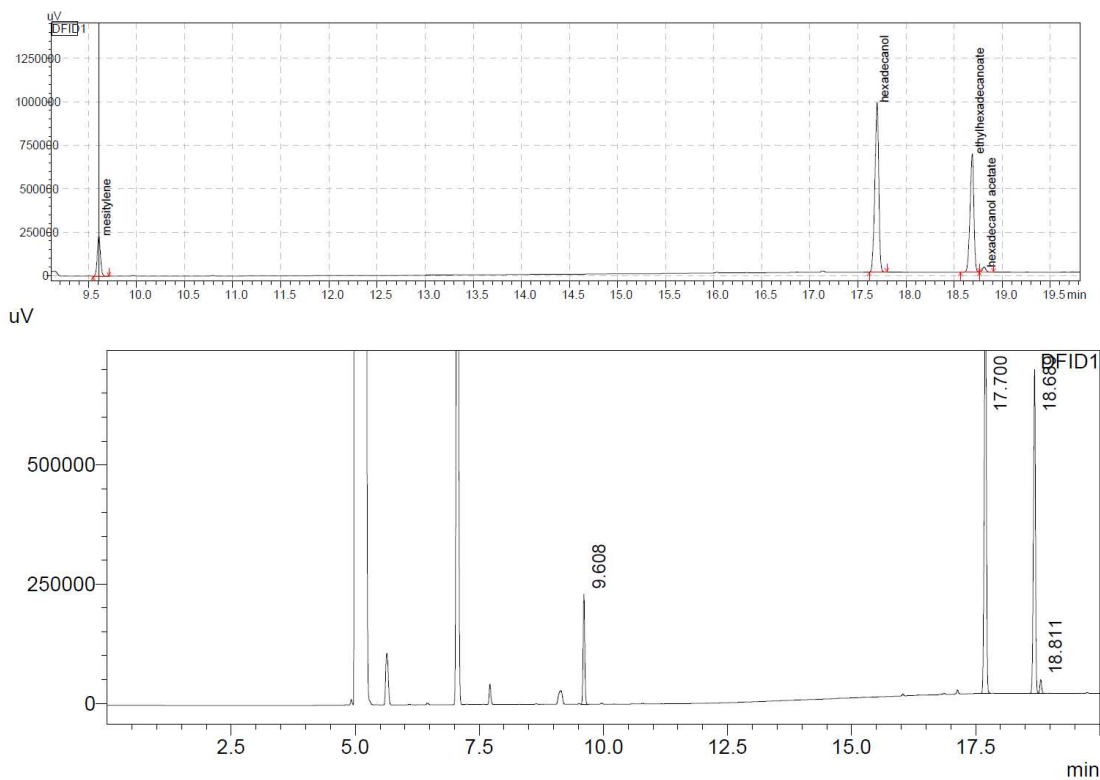

#### <Peak Table>

| Peak# | Ret. Time | Area    | Height  | Conc.  | Unit | Mark | Name                |
|-------|-----------|---------|---------|--------|------|------|---------------------|
| 1     | 9.608     | 526977  | 228530  | 10.156 | ppm  | V    | mesitylene          |
| 2     | 17.700    | 2713436 | 968840  | 52.295 | ppm  | M    | hexadecanol         |
| 3     | 18.689    | 1877327 | 677722  | 36.181 | ppm  |      | ethylhexadecanoate  |
| 4     | 18.811    | 70963   | 28774   | 1.368  | ppm  | V    | hexadecanol acetate |
| Total |           | 5188703 | 1903866 |        |      |      |                     |

Yield of hexadecanol divided by conversion factor 3.00 and further divided by 3 (triglyceride).

**Figure S54.** GC chromatograph (Table-4, Entry-9)

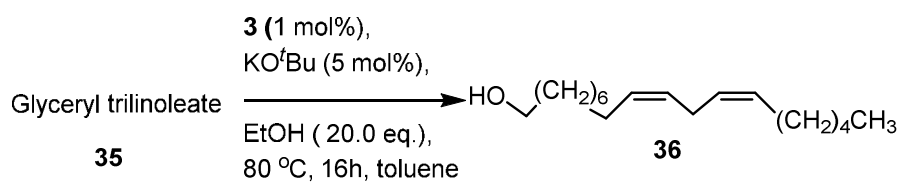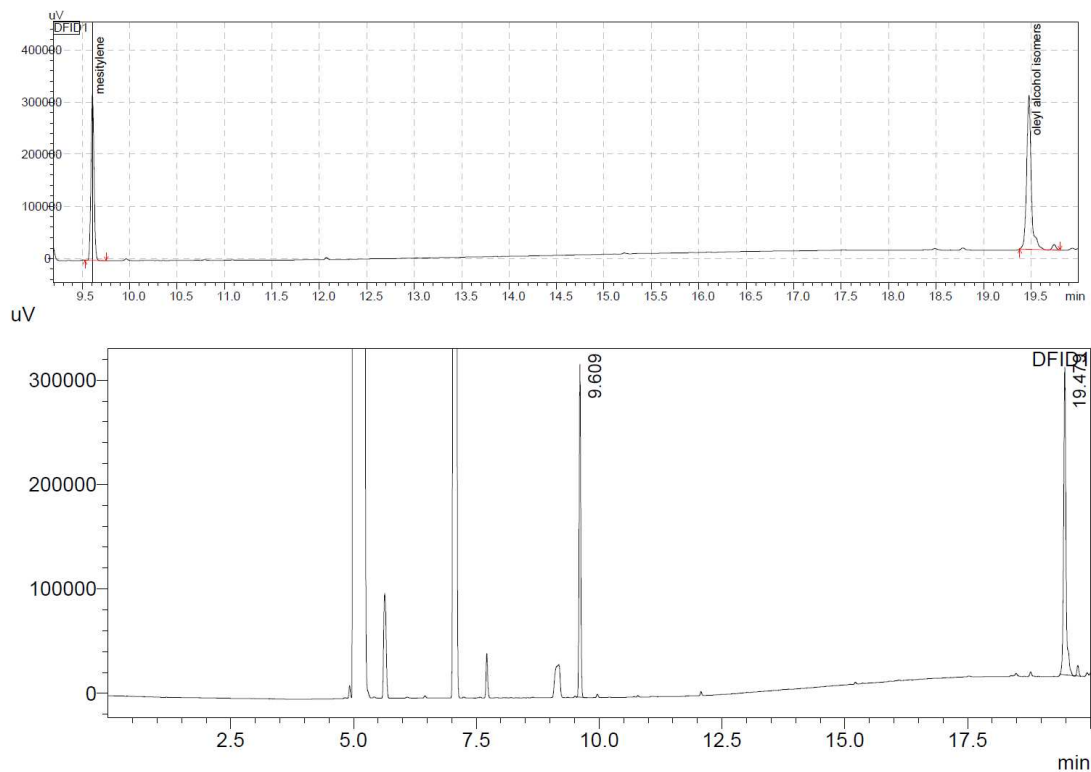

**<Peak Table>**

| Peak# | Ret. Time | Area    | Height | Conc.  | Unit | Mark | Name                  |
|-------|-----------|---------|--------|--------|------|------|-----------------------|
| 1     | 9.609     | 719681  | 316513 | 41.603 | ppm  | M    | mesitylene            |
| 2     | 19.479    | 1010198 | 293786 | 58.397 | ppm  | M    | oleyl alcohol isomers |
| Total |           | 1729879 | 610299 |        |      |      |                       |

Hexadecanol conversion factor 3.00 was used, and product was further divided by three (triglyceride)

**Figure S55.** GC chromatograph (Table-4, Entry-10)

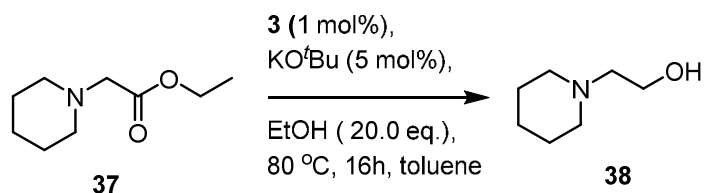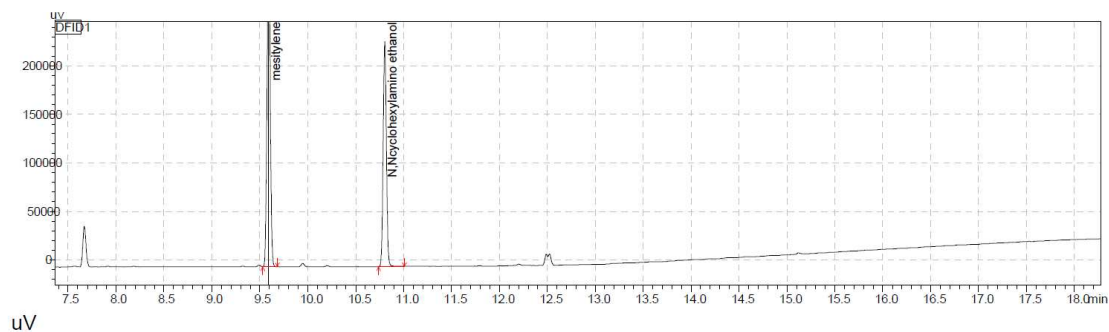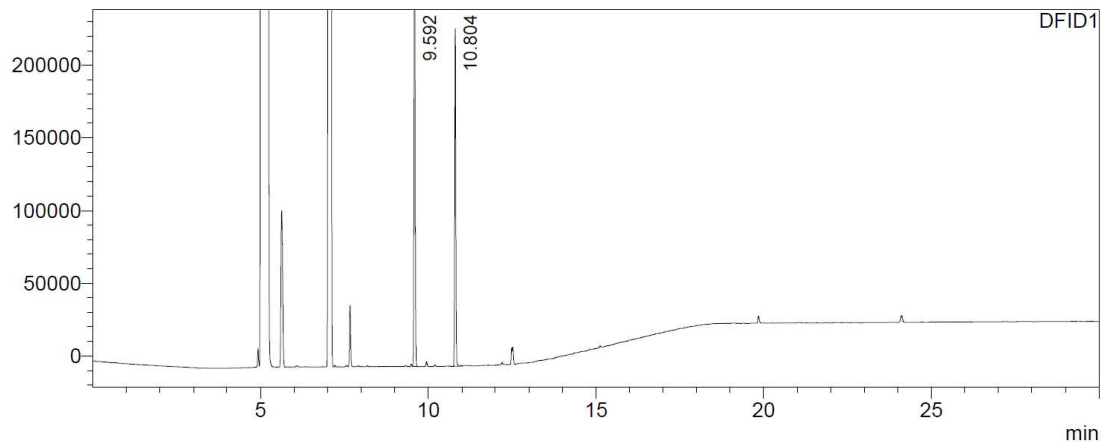

**<Peak Table>**

| Peak# | Ret. Time | Area    | Height | Conc.  | Unit | Mark | Name                        |
|-------|-----------|---------|--------|--------|------|------|-----------------------------|
| 1     | 9.592     | 807043  | 348794 | 59.699 | ppm  | V    | mesitylene                  |
| 2     | 10.804    | 544807  | 229159 | 40.301 | ppm  | V    | N,N-cyclohexylamino ethanol |
| Total |           | 1351850 | 577953 |        |      |      |                             |

Conversion factor used was based on ethyl-3N,N-dimethylamino propionate (0.67). Only trace starting material observed

**Figure S56.** GC chromatograph (Table-4, Entry-11)

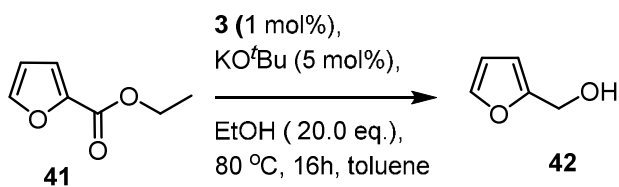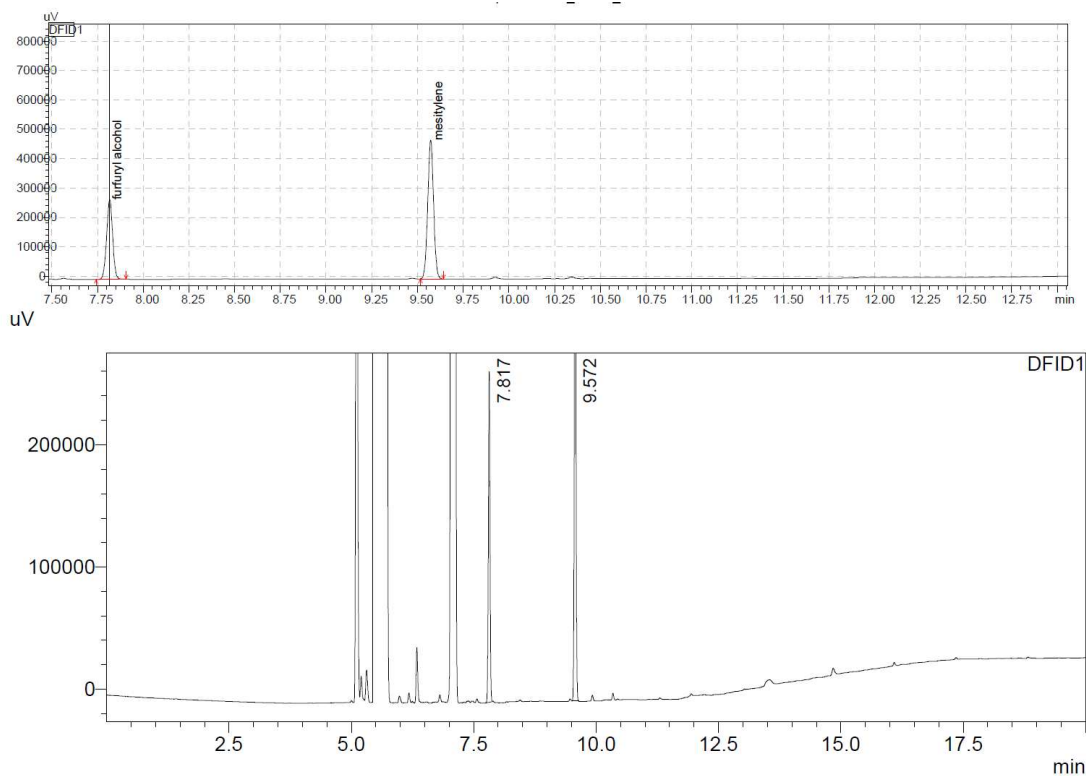

<Peak Table>

| Peak# | Ret. Time | Area    | Height | Conc.  | Unit | Mark | Name             |
|-------|-----------|---------|--------|--------|------|------|------------------|
| 1     | 7.817     | 618877  | 267525 | 36.994 | ppm  | M    | furfuryl alcohol |
| 2     | 9.572     | 1054049 | 464422 | 63.006 | ppm  | M    | mesitylene       |
| Total |           | 1672925 | 731946 |        |      |      |                  |

Conversion factor for furfuryl alcohol **42** is 0.62; only trace starting material is observed. Runs had to be performed in ethyl acetate as furfuryl alcohol retention time overlaps with acetone (solvent used for all other runs) homocoupling product.

**Figure S57.** GC chromatograph (Table-4, Entry-14)

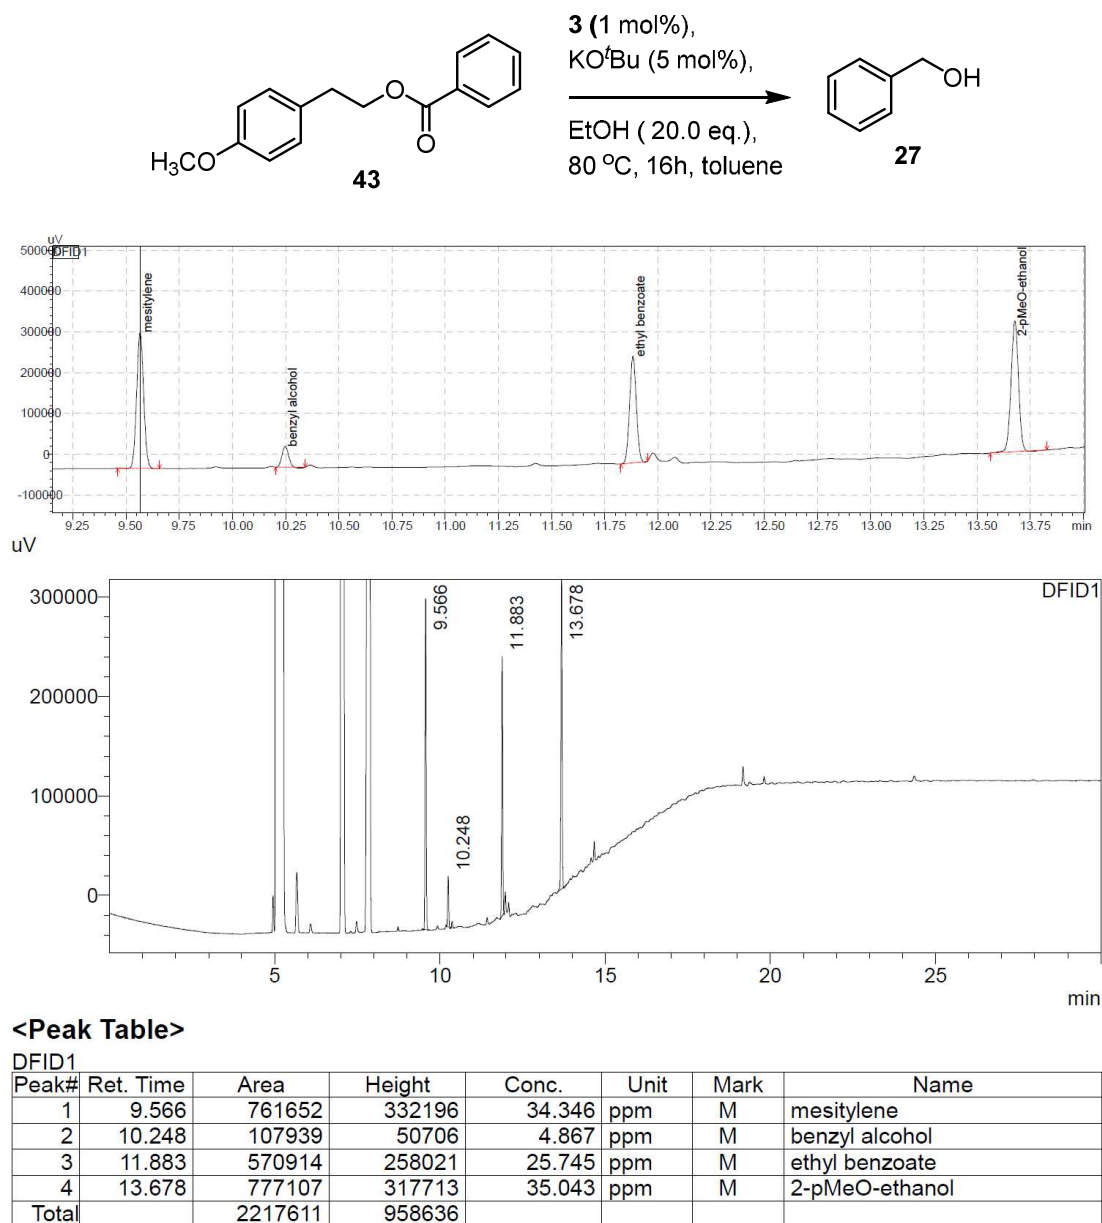

**Figure S58.** GC chromatograph (Table-4, Entry-15)

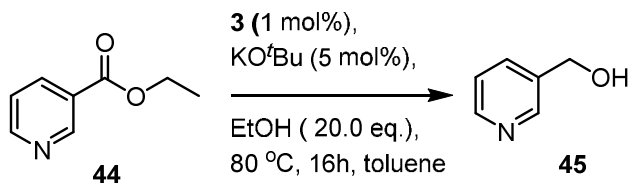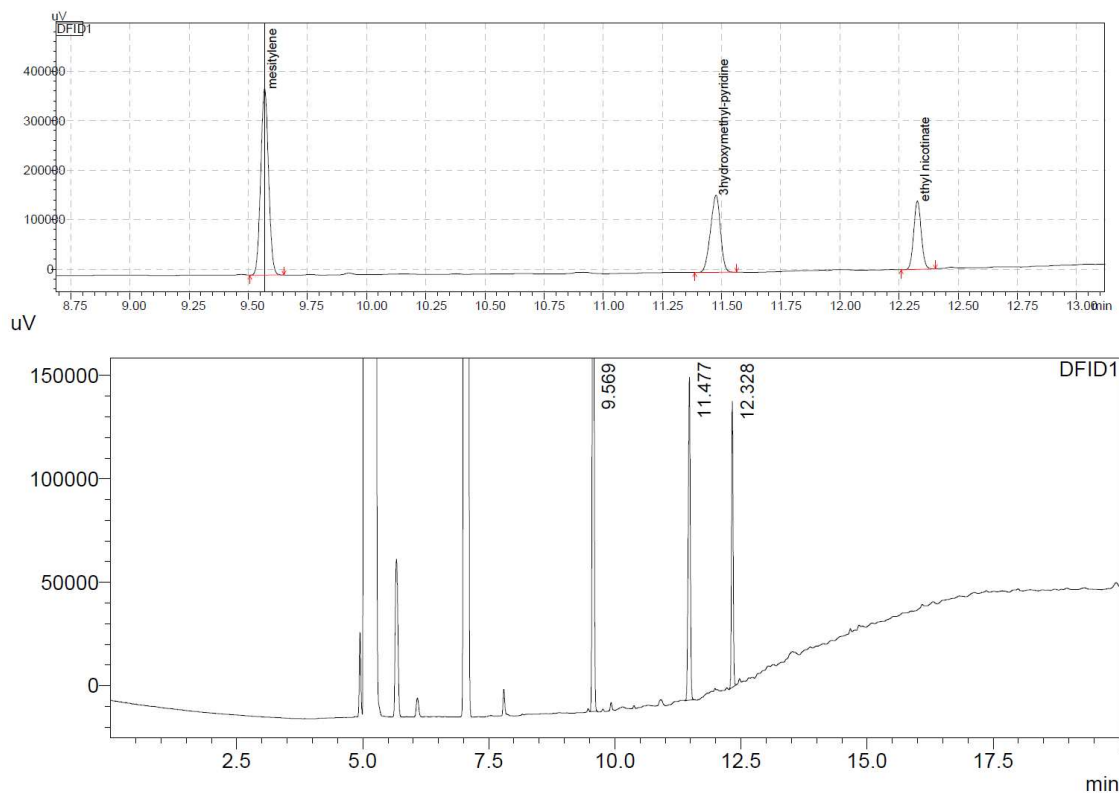

<Peak Table>

| Peak# | Ret. Time | Area    | Height | Conc.  | Unit | Mark | Name                    |
|-------|-----------|---------|--------|--------|------|------|-------------------------|
| 1     | 9.569     | 866099  | 375919 | 53.193 | ppm  | M    | mesitylene              |
| 2     | 11.477    | 457667  | 155613 | 28.108 | ppm  | M    | 3hydroxymethyl-pyridine |
| 3     | 12.328    | 304461  | 137579 | 18.699 | ppm  | M    | ethyl nicotinate        |
| Total |           | 1628227 | 669110 |        |      |      |                         |

Conversion factor for product was determined to be 0.73

**Figure S59.** GC chromatograph (Table-4, Entry-16)

## References

- (1) Spasyuk, D.; Smith, S.; Gusev, D. G. *Angew. Chem. Int. Ed.* **2013**, *52*, 2538-2542.
- (2) Khaskin, E.; Milstein, D. *ACS Catal.* **2013**, *3*, 448-452.
- (3) Ochiai, M.; Yoshimura, A.; Hoque, M.; Okubo, T.; Saito, M.; Miyamoto, K. *Org. Lett.* **2011**, *13*, 5568-5571.
- (4) Srimani, D.; Leitun, G.; Ben-David, Y.; Milstein, D. *Angew. Chem. Int. Ed.* **2014**, *53*, 11092-11095.
- (5) Khaskin, E.; Milstein, D. *Chem. Comm.* **2015**, *51*, 9002-9005.
- (6) Montag, M.; Zhang, J.; Milstein, D. *J. Am. Chem. Soc.* **2012**, *134*, 10325-10328.
- (7) Stanton, M. G.; Gagne, M. R. *J. Am. Chem. Soc.* **1997**, *119*, 5075-5076.
- (8) Parr R. G.; Yang W. In *Density-functional theory of atoms and molecules*; Oxford University Press: Oxford, **1989**.
- (9) Perdew, J. P.; Burke, K.; Ernzerhof, M. *Phys. Rev. Lett.* **1996**, *77*, 3865-3868.
- (10) Laikov, D. N. *Chem. Phys. Lett.* **1997**, *281*, 151-156.
- (11) Laikov, D. N.; Ustynyuk; Yu. A. *Russ. Chem. Bull.* **2005**, *54*, 820-826.
- (12) (a) Stevens, W. J.; Basch, H.; Krauss, M. *J. Chem. Phys.* **1984**, *81*, 6026-6033; (b) Stevens, W. J.; Basch, H.; Krauss, M.; Jansen, P. *Can. J. Chem.* **1992**, *70*, 612-630; (c) Cundari, T. R.; Stevens, W. J. *J. Chem. Phys.* **1993**, *98*, 5555-5565.
